# Supplementary material for: Genome-Wide Transcriptional Profiling Reveals MicroRNA-Correlated Genes and Biological Processes in Human Lymphoblastoid Cell Lines
Source: PLoS One. 2009 Jun 11;4(6):e5878. doi: 10.1371/journal.pone.0005878 (PMC2691578; doi:10.1371/journal.pone.0005878)
Supplement: Table S1 — Excel spreadsheet containing all miRNA-mRNA pairs with significant correlation (qFDR<0.01). (3.28 MB XLS) [file pone.0005878.s001.xls]

## Sheet: qFDR<0.01
mRNA Genes				microRNA		Pearson Correlation
mRNA probe ID	Gene Accession	Gene Name	Chr	microRNA	Chr	r	qFDR	p
10025	NM_000574.2	CD55	1	hsa-miR-181a	1	0.489809	0.000140508	9.60002e-07
10025	NM_000574.2	CD55	1	hsa-miR-181a	9	0.489809	0.000140508	9.60002e-07
10025	NM_000574.2	CD55	1	hsa-miR-181b	1	0.501002	8.94e-05	4.9245e-07
10025	NM_000574.2	CD55	1	hsa-miR-181b	9	0.501002	8.94e-05	4.9245e-07
10025	NM_000574.2	CD55	1	hsa-miR-181c	19	0.532663	2.79e-05	6.51554e-08
10025	NM_000574.2	CD55	1	hsa-miR-18b	X	0.383957	0.00420522	0.000187058
10025	NM_000574.2	CD55	1	hsa-miR-20b	X	0.374881	0.00578676	0.000272187
10025	NM_000574.2	CD55	1	hsa-miR-213	1	0.489869	0.000234489	9.56633e-07
10025	NM_000574.2	CD55	1	hsa-miR-30a-5p	6	0.431693	0.00485078	2.15438e-05
10025	NM_000574.2	CD55	1	hsa-miR-363	X	0.403233	0.00211071	8.12745e-05
10048	NM_000465.1	BARD1	2	hsa-miR-331	12	-0.448761	0.00126029	9.159e-06
10048	NM_000465.1	BARD1	2	hsa-miR-9	1	-0.380896	0.00824881	0.000212542
10048	NM_000465.1	BARD1	2	hsa-miR-9	5	-0.380896	0.00824881	0.000212542
10048	NM_000465.1	BARD1	2	hsa-miR-9	15	-0.380896	0.00824881	0.000212542
10048	NM_000465.1	BARD1	2	hsa-miR-9*	1	-0.377872	0.00773366	0.00024083
10048	NM_000465.1	BARD1	2	hsa-miR-9*	5	-0.377872	0.00773366	0.00024083
10048	NM_000465.1	BARD1	2	hsa-miR-9*	15	-0.377872	0.00773366	0.00024083
10048	NM_000465.1	BARD1	2	hsa-miR-98	X	-0.485512	0.000868838	1.23272e-06
10082	NM_173647.2	RNF149	2	hsa-miR-10a	17	0.431897	0.00109453	2.13305e-05
10082	NM_173647.2	RNF149	2	hsa-miR-130b	22	0.487049	0.00110376	1.1277e-06
10082	NM_173647.2	RNF149	2	hsa-miR-18b	X	0.623147	4.29e-08	5.41858e-11
10082	NM_173647.2	RNF149	2	hsa-miR-20b	X	0.512825	2.94e-05	2.36982e-07
10082	NM_173647.2	RNF149	2	hsa-miR-215	1	0.433109	0.009186	2.01029e-05
10082	NM_173647.2	RNF149	2	hsa-miR-363	X	0.527111	1.21e-05	9.43004e-08
10082	NM_173647.2	RNF149	2	hsa-miR-486	8	0.428143	0.00426532	2.55923e-05
10273	NM_013441.2	RCAN3	1	hsa-miR-181c	19	-0.365933	0.00951429	0.000389829
10273	NM_013441.2	RCAN3	1	hsa-miR-339	7	-0.427219	0.0029913	2.67571e-05
10273	NM_013441.2	RCAN3	1	hsa-miR-363	X	-0.367928	0.00592199	0.000360148
10273	NM_013441.2	RCAN3	1	hsa-miR-98	X	0.387982	0.0068962	0.000157837
10370	NM_020156.1	C1GALT1	7	hsa-miR-221	X	0.376989	0.00818071	0.000249722
10458	NM_001048201.1	UHRF1	19	hsa-miR-331	12	-0.489721	0.00036647	9.64964e-07
10458	NM_001048201.1	UHRF1	19	hsa-miR-9	1	-0.374484	0.00948715	0.000276621
10458	NM_001048201.1	UHRF1	19	hsa-miR-9	5	-0.374484	0.00948715	0.000276621
10458	NM_001048201.1	UHRF1	19	hsa-miR-9	15	-0.374484	0.00948715	0.000276621
10458	NM_001048201.1	UHRF1	19	hsa-miR-9*	1	-0.38817	0.0061084	0.000156582
10458	NM_001048201.1	UHRF1	19	hsa-miR-9*	5	-0.38817	0.0061084	0.000156582
10458	NM_001048201.1	UHRF1	19	hsa-miR-9*	15	-0.38817	0.0061084	0.000156582
10458	NM_001048201.1	UHRF1	19	hsa-miR-98	X	-0.425272	0.00330384	2.93754e-05
10524	NM_199413.1	PRC1	15	hsa-miR-18b	X	0.379232	0.00475066	0.000227704
10524	NM_199413.1	PRC1	15	hsa-miR-331	12	-0.500051	0.000245303	5.21671e-07
10524	NM_199413.1	PRC1	15	hsa-miR-363	X	0.349711	0.00971755	0.000728501
10524	NM_199413.1	PRC1	15	hsa-miR-486	8	0.405951	0.00725653	7.19613e-05
10524	NM_199413.1	PRC1	15	hsa-miR-551a	1	-0.469197	0.00437214	3.0903e-06
10524	NM_199413.1	PRC1	15	hsa-miR-98	X	-0.409277	0.0047161	6.19153e-05
10543	NM_033121.1	ANKRD13A	12	hsa-miR-18b	X	-0.428983	0.000971822	2.45748e-05
10543	NM_033121.1	ANKRD13A	12	hsa-miR-20b	X	-0.521303	1.78e-05	1.37859e-07
10543	NM_033121.1	ANKRD13A	12	hsa-miR-222	X	-0.373307	0.00999334	0.00029016
10543	NM_033121.1	ANKRD13A	12	hsa-miR-339	7	-0.474938	0.000886889	2.24848e-06
10543	NM_033121.1	ANKRD13A	12	hsa-miR-363	X	-0.511784	2.66e-05	2.53027e-07
10543	NM_033121.1	ANKRD13A	12	hsa-miR-9	1	0.50883	0.000249572	3.04362e-07
10543	NM_033121.1	ANKRD13A	12	hsa-miR-9	5	0.50883	0.000249572	3.04362e-07
10543	NM_033121.1	ANKRD13A	12	hsa-miR-9	15	0.50883	0.000249572	3.04362e-07
10543	NM_033121.1	ANKRD13A	12	hsa-miR-9*	1	0.515307	0.000142586	2.02533e-07
10543	NM_033121.1	ANKRD13A	12	hsa-miR-9*	5	0.515307	0.000142586	2.02533e-07
10543	NM_033121.1	ANKRD13A	12	hsa-miR-9*	15	0.515307	0.000142586	2.02533e-07
10563	NM_020062.3	SLC2A4RG	20	hsa-miR-181b	1	0.373216	0.00689262	0.000291231
10563	NM_020062.3	SLC2A4RG	20	hsa-miR-181b	9	0.373216	0.00689262	0.000291231
10563	NM_020062.3	SLC2A4RG	20	hsa-miR-18b	X	0.357287	0.00857911	0.000546247
10682	NM_007243.1	NRM	6	hsa-miR-181b	1	0.459466	0.000475621	5.2296e-06
10682	NM_007243.1	NRM	6	hsa-miR-181b	9	0.459466	0.000475621	5.2296e-06
10682	NM_007243.1	NRM	6	hsa-miR-34b	11	-0.520231	0.00148456	1.47754e-07
10682	NM_007243.1	NRM	6	hsa-miR-9	1	-0.397359	0.00562141	0.00010535
10682	NM_007243.1	NRM	6	hsa-miR-9	5	-0.397359	0.00562141	0.00010535
10682	NM_007243.1	NRM	6	hsa-miR-9	15	-0.397359	0.00562141	0.00010535
10682	NM_007243.1	NRM	6	hsa-miR-9*	1	-0.417935	0.00288067	4.15482e-05
10682	NM_007243.1	NRM	6	hsa-miR-9*	5	-0.417935	0.00288067	4.15482e-05
10682	NM_007243.1	NRM	6	hsa-miR-9*	15	-0.417935	0.00288067	4.15482e-05
10754	NM_020820.3	PREX1	20	hsa-miR-625	14	0.455848	0.00350337	6.33349e-06
20138	XM_001133189.1	INPP5A	10	hsa-miR-181a	1	0.403549	0.00314677	8.01369e-05
20138	XM_001133189.1	INPP5A	10	hsa-miR-181a	9	0.403549	0.00314677	8.01369e-05
20138	XM_001133189.1	INPP5A	10	hsa-miR-181b	1	0.374385	0.00665671	0.000277737
20138	XM_001133189.1	INPP5A	10	hsa-miR-181b	9	0.374385	0.00665671	0.000277737
20138	XM_001133189.1	INPP5A	10	hsa-miR-181c	19	0.403839	0.00335464	7.9106e-05
20138	XM_001133189.1	INPP5A	10	hsa-miR-18b	X	0.371774	0.00582589	0.000308708
20138	XM_001133189.1	INPP5A	10	hsa-miR-20b	X	0.408251	0.00205268	6.48658e-05
20138	XM_001133189.1	INPP5A	10	hsa-miR-213	1	0.405923	0.00376528	7.2052e-05
20138	XM_001133189.1	INPP5A	10	hsa-miR-363	X	0.425492	0.000998735	2.9068e-05
20202	NM_019013.1	FAM64A	17	hsa-miR-130a	11	0.471549	0.00167187	2.71469e-06
20202	NM_019013.1	FAM64A	17	hsa-miR-181b	1	0.400314	0.00332664	9.25152e-05
20202	NM_019013.1	FAM64A	17	hsa-miR-181b	9	0.400314	0.00332664	9.25152e-05
20202	NM_019013.1	FAM64A	17	hsa-miR-18b	X	0.466979	0.000228218	3.48894e-06
20202	NM_019013.1	FAM64A	17	hsa-miR-20b	X	0.467008	0.000241004	3.48343e-06
20202	NM_019013.1	FAM64A	17	hsa-miR-339	7	0.55142	5.16e-05	1.77664e-08
20202	NM_019013.1	FAM64A	17	hsa-miR-363	X	0.432892	0.000783437	2.03177e-05
20202	NM_019013.1	FAM64A	17	hsa-miR-9	1	-0.457005	0.00114357	5.95865e-06
20202	NM_019013.1	FAM64A	17	hsa-miR-9	5	-0.457005	0.00114357	5.95865e-06
20202	NM_019013.1	FAM64A	17	hsa-miR-9	15	-0.457005	0.00114357	5.95865e-06
20202	NM_019013.1	FAM64A	17	hsa-miR-9*	1	-0.512368	0.00015132	2.43903e-07
20202	NM_019013.1	FAM64A	17	hsa-miR-9*	5	-0.512368	0.00015132	2.43903e-07
20202	NM_019013.1	FAM64A	17	hsa-miR-9*	15	-0.512368	0.00015132	2.43903e-07
20242	XM_944469.1	LOC648659	15	hsa-miR-10a	17	-0.364333	0.00850403	0.000415239
20274	NM_024551.2	ADIPOR2	12	hsa-miR-33b	17	0.498292	0.00108502	5.80099e-07
20373	NM_004219.2	PTTG1	5	hsa-miR-10a	17	0.420385	0.0016434	3.70391e-05
20373	NM_004219.2	PTTG1	5	hsa-miR-130b	22	0.423545	0.00664264	3.18962e-05
20427	NM_002710.1	PPP1CC	12	hsa-miR-33b	17	0.420702	0.00631953	3.64903e-05
20451	NM_148976.1	PSMA1	11	hsa-miR-20b	X	0.359414	0.00882057	0.000503182
20451	NM_148976.1	PSMA1	11	hsa-miR-339	7	0.424692	0.00325121	3.02004e-05
20451	NM_148976.1	PSMA1	11	hsa-miR-363	X	0.354782	0.0084672	0.000601279
20670	NM_134421.1	HPCAL1	2	hsa-miR-181a	1	0.422342	0.00175584	3.377e-05
20670	NM_134421.1	HPCAL1	2	hsa-miR-181a	9	0.422342	0.00175584	3.377e-05
20670	NM_134421.1	HPCAL1	2	hsa-miR-181b	1	0.473986	0.000272486	2.37118e-06
20670	NM_134421.1	HPCAL1	2	hsa-miR-181b	9	0.473986	0.000272486	2.37118e-06
20670	NM_134421.1	HPCAL1	2	hsa-miR-181c	19	0.486418	0.000174179	1.16975e-06
20670	NM_134421.1	HPCAL1	2	hsa-miR-213	1	0.400935	0.00449827	9.00094e-05
20670	NM_134421.1	HPCAL1	2	hsa-miR-9*	1	-0.419664	0.00278555	3.83163e-05
20670	NM_134421.1	HPCAL1	2	hsa-miR-9*	5	-0.419664	0.00278555	3.83163e-05
20670	NM_134421.1	HPCAL1	2	hsa-miR-9*	15	-0.419664	0.00278555	3.83163e-05
20674	NM_015127.3	CLCC1	1	hsa-miR-331	12	-0.375615	0.00960938	0.000264162
50097	NM_014106.2	ZNF770	15	hsa-miR-9	1	-0.422449	0.00312999	3.35992e-05
50097	NM_014106.2	ZNF770	15	hsa-miR-9	5	-0.422449	0.00312999	3.35992e-05
50097	NM_014106.2	ZNF770	15	hsa-miR-9	15	-0.422449	0.00312999	3.35992e-05
50097	NM_014106.2	ZNF770	15	hsa-miR-9*	1	-0.381337	0.00709978	0.000208683
50097	NM_014106.2	ZNF770	15	hsa-miR-9*	5	-0.381337	0.00709978	0.000208683
50097	NM_014106.2	ZNF770	15	hsa-miR-9*	15	-0.381337	0.00709978	0.000208683
50156	NM_005561.3	LAMP1	13	hsa-miR-18b	X	-0.394921	0.00306977	0.000117163
50156	NM_005561.3	LAMP1	13	hsa-miR-33b	17	-0.398313	0.00917395	0.000101037
50176	NM_005880.2	DNAJA2	16	hsa-miR-20b	X	-0.375616	0.0056597	0.000264151
50176	NM_005880.2	DNAJA2	16	hsa-miR-363	X	-0.373084	0.00518107	0.000292793
50224	NM_144766.1	RGS13	1	hsa-miR-10a	17	0.517257	4.19e-05	1.78861e-07
50224	NM_144766.1	RGS13	1	hsa-miR-18b	X	0.393522	0.00319475	0.000124484
50224	NM_144766.1	RGS13	1	hsa-miR-194	1	0.4104	0.00683309	5.88293e-05
50224	NM_144766.1	RGS13	1	hsa-miR-194	11	0.4104	0.00683309	5.88293e-05
50224	NM_144766.1	RGS13	1	hsa-miR-20b	X	0.401065	0.00259231	8.94929e-05
50224	NM_144766.1	RGS13	1	hsa-miR-363	X	0.411062	0.00162583	5.70778e-05
50224	NM_144766.1	RGS13	1	hsa-miR-486	8	0.395678	0.00851809	0.00011337
50301	NM_001039933.1	CD79B	17	hsa-miR-181a	1	0.40955	0.00263623	6.11515e-05
50301	NM_001039933.1	CD79B	17	hsa-miR-181a	9	0.40955	0.00263623	6.11515e-05
50301	NM_001039933.1	CD79B	17	hsa-miR-181b	1	0.459458	0.000475621	5.23183e-06
50301	NM_001039933.1	CD79B	17	hsa-miR-181b	9	0.459458	0.000475621	5.23183e-06
50301	NM_001039933.1	CD79B	17	hsa-miR-181c	19	0.408309	0.0029722	6.46955e-05
50301	NM_001039933.1	CD79B	17	hsa-miR-213	1	0.450316	0.000977759	8.45283e-06
50324	NM_152686.2	DNAJC18	5	hsa-miR-221	X	-0.3782	0.00794445	0.000237602
50324	NM_152686.2	DNAJC18	5	hsa-miR-222	X	-0.396051	0.00552833	0.000111543
50324	NM_152686.2	DNAJC18	5	hsa-miR-339	7	-0.50696	0.000270964	3.41811e-07
50348	NM_144998.2	STRA13	17	HS_243.1	16	0.491283	0.0051504	8.804e-07
50348	NM_144998.2	STRA13	17	hsa-miR-339	7	0.382315	0.0091471	0.000200355
50348	NM_144998.2	STRA13	17	hsa-miR-9	1	-0.375686	0.00923977	0.000263397
50348	NM_144998.2	STRA13	17	hsa-miR-9	5	-0.375686	0.00923977	0.000263397
50348	NM_144998.2	STRA13	17	hsa-miR-9	15	-0.375686	0.00923977	0.000263397
50348	NM_144998.2	STRA13	17	hsa-miR-9*	1	-0.370348	0.00955942	0.000326935
50348	NM_144998.2	STRA13	17	hsa-miR-9*	5	-0.370348	0.00955942	0.000326935
50348	NM_144998.2	STRA13	17	hsa-miR-9*	15	-0.370348	0.00955942	0.000326935
50465	XM_936525.1	LOC647460	2	hsa-miR-9	1	-0.39531	0.00583771	0.0001152
50465	XM_936525.1	LOC647460	2	hsa-miR-9	5	-0.39531	0.00583771	0.0001152
50465	XM_936525.1	LOC647460	2	hsa-miR-9	15	-0.39531	0.00583771	0.0001152
50465	XM_936525.1	LOC647460	2	hsa-miR-9*	1	-0.37318	0.00878047	0.000291656
50465	XM_936525.1	LOC647460	2	hsa-miR-9*	5	-0.37318	0.00878047	0.000291656
50465	XM_936525.1	LOC647460	2	hsa-miR-9*	15	-0.37318	0.00878047	0.000291656
50519	NM_015086.1	DDN	12	hsa-miR-221	X	-0.455412	0.000700425	6.48041e-06
50519	NM_015086.1	DDN	12	hsa-miR-222	X	-0.484317	0.000267503	1.3207e-06
50521	NM_004850.3	ROCK2	2	hsa-miR-363	X	-0.429303	0.000886565	2.41972e-05
50528	NM_152515.2	CKAP2L	2	hsa-miR-331	12	-0.453642	0.0010598	7.11041e-06
50528	NM_152515.2	CKAP2L	2	hsa-miR-98	X	-0.392468	0.0064469	0.000130277
50544	NM_001042470.1	SUMF2	7	hsa-miR-221	X	-0.369187	0.00994841	0.000342501
50632	NM_005898.4	CAPRIN1	11	hsa-miR-363	X	-0.356428	0.00818832	0.000564576
50671	NM_003380.2	VIM	10	hsa-miR-10a	17	0.369453	0.00733458	0.000338876
50671	NM_003380.2	VIM	10	hsa-miR-130b	22	0.501323	0.000787828	4.82942e-07
50671	NM_003380.2	VIM	10	hsa-miR-151	8	-0.589645	5.55e-06	9.67109e-10
50671	NM_003380.2	VIM	10	hsa-miR-18b	X	0.464691	0.000249059	3.95062e-06
50671	NM_003380.2	VIM	10	hsa-miR-20b	X	0.400341	0.00265033	9.24049e-05
50671	NM_003380.2	VIM	10	hsa-miR-30a-5p	6	0.454519	0.00234681	6.79139e-06
50671	NM_003380.2	VIM	10	hsa-miR-30b	8	0.424496	0.00731111	3.04841e-05
50671	NM_003380.2	VIM	10	hsa-miR-363	X	0.422413	0.00109945	3.36566e-05
50671	NM_003380.2	VIM	10	hsa-miR-486	8	0.45641	0.00187875	6.14873e-06
50685	XM_945490.1	RBM4	11	hsa-miR-10a	17	-0.395968	0.00364244	0.000111947
60072	NM_037370.1	CCNDBP1	15	hsa-miR-9	1	0.418605	0.00327215	4.02667e-05
60072	NM_037370.1	CCNDBP1	15	hsa-miR-9	5	0.418605	0.00327215	4.02667e-05
60072	NM_037370.1	CCNDBP1	15	hsa-miR-9	15	0.418605	0.00327215	4.02667e-05
60072	NM_037370.1	CCNDBP1	15	hsa-miR-9*	1	0.420569	0.00275883	3.67196e-05
60072	NM_037370.1	CCNDBP1	15	hsa-miR-9*	5	0.420569	0.00275883	3.67196e-05
60072	NM_037370.1	CCNDBP1	15	hsa-miR-9*	15	0.420569	0.00275883	3.67196e-05
60202	CB159370		11	hsa-miR-18b	X	-0.380994	0.0045812	0.000211679
60202	CB159370		11	hsa-miR-20b	X	-0.359858	0.00873813	0.000494595
60202	CB159370		11	hsa-miR-363	X	-0.38244	0.00390223	0.000199312
60202	CB159370		11	hsa-miR-486	8	-0.40093	0.00768042	9.00293e-05
60259	NM_133263.2	PPARGC1B	5	hsa-miR-138	3	0.43815	0.00745848	1.56723e-05
60259	NM_133263.2	PPARGC1B	5	hsa-miR-138	16	0.43815	0.00745848	1.56723e-05
60372	NM_000078.1	CETP	16	hsa-miR-221	X	-0.426659	0.00201176	2.74869e-05
60372	NM_000078.1	CETP	16	hsa-miR-222	X	-0.435175	0.00167747	1.81615e-05
60433	NM_152994.2	CCDC128	2	hsa-miR-9	1	-0.380135	0.00834833	0.000219356
60433	NM_152994.2	CCDC128	2	hsa-miR-9	5	-0.380135	0.00834833	0.000219356
60433	NM_152994.2	CCDC128	2	hsa-miR-9	15	-0.380135	0.00834833	0.000219356
60451	NM_024896.2	ERMP1	9	hsa-miR-18b	X	0.409952	0.00188584	6.00428e-05
60451	NM_024896.2	ERMP1	9	hsa-miR-20b	X	0.444997	0.000568604	1.11044e-05
60451	NM_024896.2	ERMP1	9	hsa-miR-363	X	0.389758	0.00317594	0.000146338
60546	AK057981		4	hsa-miR-10a	17	0.359888	0.00944349	0.00049402
60546	AK057981		4	hsa-miR-181a	1	0.417881	0.00196279	4.16531e-05
60546	AK057981		4	hsa-miR-181a	9	0.417881	0.00196279	4.16531e-05
60546	AK057981		4	hsa-miR-181b	1	0.51046	6.18e-05	2.74927e-07
60546	AK057981		4	hsa-miR-181b	9	0.51046	6.18e-05	2.74927e-07
60546	AK057981		4	hsa-miR-181c	19	0.425496	0.00175422	2.90624e-05
60546	AK057981		4	hsa-miR-18b	X	0.403367	0.00233517	8.07903e-05
60546	AK057981		4	hsa-miR-20b	X	0.358146	0.00898624	0.000528465
60546	AK057981		4	hsa-miR-213	1	0.398235	0.00475966	0.000101383
60546	AK057981		4	hsa-miR-221	X	0.591109	1.14e-06	8.5853e-10
60546	AK057981		4	hsa-miR-222	X	0.610893	3.12e-07	1.61699e-10
60546	AK057981		4	hsa-miR-363	X	0.47568	0.000143209	2.15703e-06
60598	NM_015245.2	ANKS1A	6	hsa-miR-18b	X	0.358999	0.00823811	0.000511332
60598	NM_015245.2	ANKS1A	6	hsa-miR-221	X	0.373656	0.0087473	0.000286083
60609	NM_001032290.1	PSRC1	1	hsa-miR-181b	1	0.410291	0.00247041	5.91224e-05
60609	NM_001032290.1	PSRC1	1	hsa-miR-181b	9	0.410291	0.00247041	5.91224e-05
60609	NM_001032290.1	PSRC1	1	hsa-miR-18b	X	0.40554	0.00216919	7.33029e-05
60609	NM_001032290.1	PSRC1	1	hsa-miR-221	X	0.517066	7.65e-05	1.81058e-07
60609	NM_001032290.1	PSRC1	1	hsa-miR-222	X	0.499735	0.000168832	5.31739e-07
60609	NM_001032290.1	PSRC1	1	hsa-miR-363	X	0.369887	0.00563352	0.000333036
60609	NM_001032290.1	PSRC1	1	hsa-miR-9*	1	-0.415638	0.00300306	4.62358e-05
60609	NM_001032290.1	PSRC1	1	hsa-miR-9*	5	-0.415638	0.00300306	4.62358e-05
60609	NM_001032290.1	PSRC1	1	hsa-miR-9*	15	-0.415638	0.00300306	4.62358e-05
60609	NM_001032290.1	PSRC1	1	hsa-miR-98	X	-0.377791	0.00906564	0.000241633
60692	NM_003607.3	CDC42BPA	1	hsa-miR-10a	17	0.527415	2.52e-05	9.24264e-08
60692	NM_003607.3	CDC42BPA	1	hsa-miR-181a	1	0.519896	3.47e-05	1.50982e-07
60692	NM_003607.3	CDC42BPA	1	hsa-miR-181a	9	0.519896	3.47e-05	1.50982e-07
60692	NM_003607.3	CDC42BPA	1	hsa-miR-181b	1	0.431462	0.00131048	2.17879e-05
60692	NM_003607.3	CDC42BPA	1	hsa-miR-181b	9	0.431462	0.00131048	2.17879e-05
60692	NM_003607.3	CDC42BPA	1	hsa-miR-181c	19	0.470836	0.000343697	2.82375e-06
60692	NM_003607.3	CDC42BPA	1	hsa-miR-18b	X	0.59032	3.63e-07	9.15506e-10
60692	NM_003607.3	CDC42BPA	1	hsa-miR-192	11	0.440173	0.00370353	1.41663e-05
60692	NM_003607.3	CDC42BPA	1	hsa-miR-194	1	0.477264	0.00108569	1.9734e-06
60692	NM_003607.3	CDC42BPA	1	hsa-miR-194	11	0.477264	0.00108569	1.9734e-06
60692	NM_003607.3	CDC42BPA	1	hsa-miR-20b	X	0.617003	6.57e-08	9.43017e-11
60692	NM_003607.3	CDC42BPA	1	hsa-miR-213	1	0.397247	0.0048874	0.000105868
60692	NM_003607.3	CDC42BPA	1	hsa-miR-30a-5p	6	0.407007	0.0097612	6.86184e-05
60692	NM_003607.3	CDC42BPA	1	hsa-miR-30d	8	0.433329	0.0087145	1.98873e-05
60692	NM_003607.3	CDC42BPA	1	hsa-miR-363	X	0.662866	1.62e-09	1.10183e-12
60707	NM_176801.1	ADD1	4	hsa-miR-221	X	0.369449	0.00987884	0.00033893
70025	NM_199331.2	HOMER2	15	hsa-miR-221	X	0.510506	0.000101927	2.74137e-07
70025	NM_199331.2	HOMER2	15	hsa-miR-222	X	0.505027	0.00013973	3.85092e-07
70025	NM_199331.2	HOMER2	15	hsa-miR-9*	1	-0.385931	0.00640484	0.000172154
70025	NM_199331.2	HOMER2	15	hsa-miR-9*	5	-0.385931	0.00640484	0.000172154
70025	NM_199331.2	HOMER2	15	hsa-miR-9*	15	-0.385931	0.00640484	0.000172154
70048	NM_001077493.1	NFKB2	10	hsa-miR-98	X	0.386804	0.00707804	0.00016592
70092	NM_014221.3	MTCP1	X	hsa-miR-33b	17	-0.40336	0.00859855	8.08155e-05
70092	NM_014221.3	MTCP1	X	hsa-miR-98	X	0.393099	0.00638317	0.00012678
70132	NM_018192.2	LEPREL1	3	hsa-miR-181a	1	-0.489249	0.000143021	9.91992e-07
70132	NM_018192.2	LEPREL1	3	hsa-miR-181a	9	-0.489249	0.000143021	9.91992e-07
70132	NM_018192.2	LEPREL1	3	hsa-miR-181b	1	-0.487132	0.000177478	1.12227e-06
70132	NM_018192.2	LEPREL1	3	hsa-miR-181b	9	-0.487132	0.000177478	1.12227e-06
70132	NM_018192.2	LEPREL1	3	hsa-miR-181c	19	-0.494534	0.000123768	7.26348e-07
70132	NM_018192.2	LEPREL1	3	hsa-miR-18b	X	-0.388254	0.00371898	0.000156024
70132	NM_018192.2	LEPREL1	3	hsa-miR-20b	X	-0.379268	0.00498955	0.000227365
70132	NM_018192.2	LEPREL1	3	hsa-miR-213	1	-0.39975	0.00464454	9.48469e-05
70132	NM_018192.2	LEPREL1	3	hsa-miR-221	X	-0.504282	0.000129203	4.03121e-07
70132	NM_018192.2	LEPREL1	3	hsa-miR-222	X	-0.493273	0.000209298	7.82796e-07
70132	NM_018192.2	LEPREL1	3	hsa-miR-30a-5p	6	-0.430763	0.0049314	2.25422e-05
70132	NM_018192.2	LEPREL1	3	hsa-miR-30d	8	-0.495011	0.00304364	7.06018e-07
70132	NM_018192.2	LEPREL1	3	hsa-miR-363	X	-0.517603	1.98e-05	1.74945e-07
70132	NM_018192.2	LEPREL1	3	hsa-miR-9*	1	0.411901	0.00339657	5.49278e-05
70132	NM_018192.2	LEPREL1	3	hsa-miR-9*	5	0.411901	0.00339657	5.49278e-05
70132	NM_018192.2	LEPREL1	3	hsa-miR-9*	15	0.411901	0.00339657	5.49278e-05
70221	XM_928041.1	LOC644964	19	hsa-miR-10a	17	-0.393604	0.00385861	0.000124044
70221	XM_928041.1	LOC644964	19	hsa-miR-181a	1	-0.407953	0.00271411	6.57469e-05
70221	XM_928041.1	LOC644964	19	hsa-miR-181a	9	-0.407953	0.00271411	6.57469e-05
70221	XM_928041.1	LOC644964	19	hsa-miR-181b	1	-0.443958	0.000818849	1.1706e-05
70221	XM_928041.1	LOC644964	19	hsa-miR-181b	9	-0.443958	0.000818849	1.1706e-05
70221	XM_928041.1	LOC644964	19	hsa-miR-181c	19	-0.383104	0.00613806	0.00019386
70221	XM_928041.1	LOC644964	19	hsa-miR-18b	X	-0.428604	0.000985293	2.50291e-05
70221	XM_928041.1	LOC644964	19	hsa-miR-20b	X	-0.418936	0.0014287	3.96474e-05
70221	XM_928041.1	LOC644964	19	hsa-miR-30a-5p	6	-0.50236	0.000451467	4.53401e-07
70221	XM_928041.1	LOC644964	19	hsa-miR-30b	8	-0.452083	0.00346394	7.71254e-06
70221	XM_928041.1	LOC644964	19	hsa-miR-30d	8	-0.43626	0.00833741	1.72136e-05
70221	XM_928041.1	LOC644964	19	hsa-miR-363	X	-0.410609	0.00164915	5.8271e-05
70307	NM_001012321.1	RPSA	3	hsa-miR-192	11	-0.454331	0.00249746	6.85862e-06
70491	NM_014943.3	ZHX2	8	hsa-miR-181b	1	0.429742	0.00138137	2.3688e-05
70491	NM_014943.3	ZHX2	8	hsa-miR-181b	9	0.429742	0.00138137	2.3688e-05
70491	NM_014943.3	ZHX2	8	hsa-miR-213	1	0.386612	0.00657273	0.000167273
70554	NM_015000.2	STK38L	12	hsa-miR-181a	1	-0.389819	0.00475175	0.000145958
70554	NM_015000.2	STK38L	12	hsa-miR-181a	9	-0.389819	0.00475175	0.000145958
70554	NM_015000.2	STK38L	12	hsa-miR-181c	19	-0.401715	0.00357409	8.69513e-05
70554	NM_015000.2	STK38L	12	hsa-miR-18b	X	-0.376302	0.00516077	0.000256848
70554	NM_015000.2	STK38L	12	hsa-miR-20b	X	-0.419586	0.00141111	3.84569e-05
70554	NM_015000.2	STK38L	12	hsa-miR-339	7	-0.382718	0.00909101	0.000197013
70554	NM_015000.2	STK38L	12	hsa-miR-363	X	-0.428208	0.000915739	2.55122e-05
70554	NM_015000.2	STK38L	12	hsa-miR-9*	1	0.392302	0.0056115	0.000131212
70554	NM_015000.2	STK38L	12	hsa-miR-9*	5	0.392302	0.0056115	0.000131212
70554	NM_015000.2	STK38L	12	hsa-miR-9*	15	0.392302	0.0056115	0.000131212
70601	DA077127		8	hsa-miR-18b	X	-0.387052	0.00386064	0.000164187
70601	DA077127		8	hsa-miR-20b	X	-0.399164	0.00273103	9.73272e-05
70601	DA077127		8	hsa-miR-363	X	-0.380564	0.00415354	0.000215491
110112	NM_001042588.1	SNUPN	15	hsa-miR-221	X	0.390983	0.0055635	0.000138864
110152	NM_014740.2	EIF4A3	17	hsa-miR-221	X	-0.403778	0.0039639	7.93218e-05
110152	NM_014740.2	EIF4A3	17	hsa-miR-222	X	-0.385707	0.00723654	0.000173789
110326	NM_024819.3	DCAKD	17	hsa-miR-221	X	-0.370256	0.00968285	0.000328145
110537	NM_025108.2	C16orf59	16	hsa-miR-331	12	-0.398071	0.00516641	0.000102115
130050	NM_172164.1	NASP	1	hsa-miR-139	11	-0.477913	0.00613886	1.90252e-06
130050	NM_172164.1	NASP	1	hsa-miR-33b	17	0.396041	0.00931802	0.000111592
130050	NM_172164.1	NASP	1	hsa-miR-98	X	-0.391538	0.00650956	0.000135595
130138	NM_181671.1	PITPNC1	17	hsa-miR-221	X	-0.4611	0.000560569	4.79283e-06
130138	NM_181671.1	PITPNC1	17	hsa-miR-222	X	-0.475485	0.000388713	2.18071e-06
130138	NM_181671.1	PITPNC1	17	hsa-miR-339	7	-0.381401	0.00940346	0.000208128
130138	NM_181671.1	PITPNC1	17	hsa-miR-33b	17	-0.411005	0.00757173	5.72267e-05
130138	NM_181671.1	PITPNC1	17	hsa-miR-551a	1	0.453943	0.00630154	6.99936e-06
130192	NM_005622.3	ACSM3	16	hsa-miR-10a	17	0.356974	0.00997989	0.000552862
130192	NM_005622.3	ACSM3	16	hsa-miR-18b	X	0.613088	8.93e-08	1.33399e-10
130192	NM_005622.3	ACSM3	16	hsa-miR-20b	X	0.638199	1.59e-08	1.32296e-11
130192	NM_005622.3	ACSM3	16	hsa-miR-363	X	0.622005	4.08e-08	6.01188e-11
130192	NM_005622.3	ACSM3	16	hsa-miR-486	8	0.472462	0.00131434	2.58084e-06
130289	NM_005779.2	LHFPL2	5	hsa-miR-10a	17	0.35755	0.00983923	0.000540746
130307	NM_005190.3	CCNC	6	hsa-miR-10a	17	-0.408801	0.00244655	6.32683e-05
130307	NM_005190.3	CCNC	6	hsa-miR-181a	1	-0.375967	0.00696788	0.000260391
130307	NM_005190.3	CCNC	6	hsa-miR-181a	9	-0.375967	0.00696788	0.000260391
130307	NM_005190.3	CCNC	6	hsa-miR-18b	X	-0.387292	0.00383189	0.000162526
130307	NM_005190.3	CCNC	6	hsa-miR-192	11	-0.417439	0.00570445	4.25212e-05
130307	NM_005190.3	CCNC	6	hsa-miR-20b	X	-0.377714	0.00523086	0.000242399
130307	NM_005190.3	CCNC	6	hsa-miR-215	1	-0.429489	0.00972054	2.39802e-05
130307	NM_005190.3	CCNC	6	hsa-miR-363	X	-0.437191	0.000675097	1.64375e-05
130349	NM_001129.3	AEBP1	7	hsa-miR-18b	X	0.375001	0.00529547	0.00027086
130349	NM_001129.3	AEBP1	7	hsa-miR-192	11	0.459312	0.00224005	5.27264e-06
130349	NM_001129.3	AEBP1	7	hsa-miR-194	1	0.42031	0.0055937	3.71701e-05
130349	NM_001129.3	AEBP1	7	hsa-miR-194	11	0.42031	0.0055937	3.71701e-05
130349	NM_001129.3	AEBP1	7	hsa-miR-20b	X	0.422525	0.00129671	3.34785e-05
130349	NM_001129.3	AEBP1	7	hsa-miR-363	X	0.42424	0.0010321	3.08584e-05
130364	NM_024519.2	FAM65A	16	hsa-miR-18b	X	0.353303	0.00964137	0.000636106
130364	NM_024519.2	FAM65A	16	hsa-miR-20b	X	0.410499	0.00191624	5.85642e-05
130364	NM_024519.2	FAM65A	16	hsa-miR-363	X	0.369056	0.0057386	0.000344299
130491	NM_003504.3	CDC45L	22	hsa-miR-331	12	-0.468607	0.000743827	3.19193e-06
130491	NM_003504.3	CDC45L	22	hsa-miR-98	X	-0.400272	0.00558693	9.2687e-05
130497	NM_004765.2	BCL7C	16	hsa-miR-33b	17	-0.397917	0.00924454	0.000102807
130524	NM_145063.2	C6orf130	6	hsa-miR-181b	1	0.415913	0.00203341	4.56497e-05
130524	NM_145063.2	C6orf130	6	hsa-miR-181b	9	0.415913	0.00203341	4.56497e-05
130717	NM_001040020.1	FAM3C	7	hsa-miR-625	14	-0.430503	0.00607306	2.28289e-05
150017	NM_177424.2	STX12	1	hsa-miR-222	X	-0.393532	0.00582594	0.00012443
150017	NM_177424.2	STX12	1	hsa-miR-331	12	0.390489	0.00606578	0.000141835
150113	NM_024520.1	C2orf47	2	hsa-miR-213	1	0.375689	0.00900216	0.000263365
150113	NM_024520.1	C2orf47	2	hsa-miR-30d	8	0.453415	0.00683133	7.19524e-06
150202	NM_153837.1	GPR114	16	hsa-miR-181a	1	-0.377867	0.0066294	0.000240879
150202	NM_153837.1	GPR114	16	hsa-miR-181a	9	-0.377867	0.0066294	0.000240879
150202	NM_153837.1	GPR114	16	hsa-miR-213	1	-0.406928	0.00369523	6.88634e-05
150202	NM_153837.1	GPR114	16	hsa-miR-30b	8	-0.441291	0.00399102	1.33933e-05
150414	NM_015180.4	SYNE2	14	hsa-miR-10a	17	0.365354	0.00831518	0.000398855
150414	NM_015180.4	SYNE2	14	hsa-miR-181a	1	0.408365	0.00271411	6.45316e-05
150414	NM_015180.4	SYNE2	14	hsa-miR-181a	9	0.408365	0.00271411	6.45316e-05
150414	NM_015180.4	SYNE2	14	hsa-miR-181b	1	0.428738	0.00141467	2.48676e-05
150414	NM_015180.4	SYNE2	14	hsa-miR-181b	9	0.428738	0.00141467	2.48676e-05
150414	NM_015180.4	SYNE2	14	hsa-miR-181c	19	0.452183	0.000698125	7.67252e-06
150414	NM_015180.4	SYNE2	14	hsa-miR-18b	X	0.459489	0.000299224	5.2232e-06
150414	NM_015180.4	SYNE2	14	hsa-miR-20b	X	0.450339	0.000475274	8.44278e-06
150414	NM_015180.4	SYNE2	14	hsa-miR-213	1	0.3876	0.00637646	0.000160418
150414	NM_015180.4	SYNE2	14	hsa-miR-363	X	0.48294	0.000102616	1.42942e-06
150538	NM_020127.1	TUFT1	1	hsa-miR-221	X	-0.479464	0.00029997	1.74272e-06
150538	NM_020127.1	TUFT1	1	hsa-miR-222	X	-0.493767	0.000209298	7.60205e-07
150538	NM_020127.1	TUFT1	1	hsa-miR-331	12	0.387839	0.0067009	0.000158799
150538	NM_020127.1	TUFT1	1	hsa-miR-339	7	-0.39193	0.00735858	0.00013333
150538	NM_020127.1	TUFT1	1	hsa-miR-9	1	0.431693	0.00236983	2.15438e-05
150538	NM_020127.1	TUFT1	1	hsa-miR-9	5	0.431693	0.00236983	2.15438e-05
150538	NM_020127.1	TUFT1	1	hsa-miR-9	15	0.431693	0.00236983	2.15438e-05
150538	NM_020127.1	TUFT1	1	hsa-miR-9*	1	0.428793	0.00222539	2.48016e-05
150538	NM_020127.1	TUFT1	1	hsa-miR-9*	5	0.428793	0.00222539	2.48016e-05
150538	NM_020127.1	TUFT1	1	hsa-miR-9*	15	0.428793	0.00222539	2.48016e-05
150538	NM_020127.1	TUFT1	1	hsa-miR-98	X	0.431627	0.00288077	2.16133e-05
150630	NM_000700.1	ANXA1	9	hsa-miR-10a	17	0.373783	0.0065547	0.000284613
150632	NM_022136.3	SAMSN1	21	hsa-miR-18b	X	-0.374902	0.00530489	0.000271954
160037	NM_015305.2	ANGEL1	14	hsa-miR-10a	17	-0.376845	0.00603224	0.0002512
160110	NM_139242.2	MTFMT	15	hsa-miR-181a	1	-0.435167	0.0011623	1.81687e-05
160110	NM_139242.2	MTFMT	15	hsa-miR-181a	9	-0.435167	0.0011623	1.81687e-05
160110	NM_139242.2	MTFMT	15	hsa-miR-181b	1	-0.409937	0.00247769	6.00839e-05
160110	NM_139242.2	MTFMT	15	hsa-miR-181b	9	-0.409937	0.00247769	6.00839e-05
160110	NM_139242.2	MTFMT	15	hsa-miR-181c	19	-0.379737	0.00669852	0.000223
160110	NM_139242.2	MTFMT	15	hsa-miR-221	X	-0.444579	0.00106497	1.13428e-05
160110	NM_139242.2	MTFMT	15	hsa-miR-222	X	-0.39512	0.00558596	0.000116155
160113	NM_006808.2	SEC61B	9	hsa-miR-10a	17	-0.359345	0.0095578	0.000504529
160113	NM_006808.2	SEC61B	9	hsa-miR-130a	11	-0.436713	0.00492909	1.68318e-05
160113	NM_006808.2	SEC61B	9	hsa-miR-181a	1	-0.450947	0.000632222	8.18113e-06
160113	NM_006808.2	SEC61B	9	hsa-miR-181a	9	-0.450947	0.000632222	8.18113e-06
160113	NM_006808.2	SEC61B	9	hsa-miR-181b	1	-0.476546	0.000251987	2.05473e-06
160113	NM_006808.2	SEC61B	9	hsa-miR-181b	9	-0.476546	0.000251987	2.05473e-06
160113	NM_006808.2	SEC61B	9	hsa-miR-181c	19	-0.44987	0.000723818	8.64996e-06
160113	NM_006808.2	SEC61B	9	hsa-miR-18b	X	-0.383661	0.00424679	0.000189393
160113	NM_006808.2	SEC61B	9	hsa-miR-20b	X	-0.367464	0.00711984	0.00036686
160113	NM_006808.2	SEC61B	9	hsa-miR-213	1	-0.398589	0.00475107	9.98194e-05
160113	NM_006808.2	SEC61B	9	hsa-miR-363	X	-0.369895	0.00563352	0.00033293
160128	NM_004310.3	RHOH	4	hsa-miR-221	X	0.389543	0.00586657	0.000147688
160128	NM_004310.3	RHOH	4	hsa-miR-222	X	0.437809	0.00152788	1.59405e-05
160180	NM_002064.1	GLRX	5	hsa-miR-181b	1	0.424795	0.00155932	3.00524e-05
160180	NM_002064.1	GLRX	5	hsa-miR-181b	9	0.424795	0.00155932	3.00524e-05
160180	NM_002064.1	GLRX	5	hsa-miR-18b	X	0.357238	0.00857911	0.000547278
160180	NM_002064.1	GLRX	5	hsa-miR-213	1	0.438883	0.00142716	1.51101e-05
160195	CK819959		10	hsa-miR-18b	X	-0.40848	0.00198756	6.41961e-05
160195	CK819959		10	hsa-miR-363	X	-0.408507	0.00174979	6.41176e-05
160241	NM_002859.1	PXN	12	hsa-miR-181b	1	0.409591	0.00250604	6.10376e-05
160241	NM_002859.1	PXN	12	hsa-miR-181b	9	0.409591	0.00250604	6.10376e-05
160241	NM_002859.1	PXN	12	hsa-miR-222	X	0.375488	0.00952486	0.000265535
160273	NM_148177.1	FBXO32	8	hsa-miR-139	11	0.455712	0.00748037	6.37898e-06
160326	NR_002324.1	SNORA62	3	hsa-miR-213	1	-0.398161	0.00475966	0.000101713
160377	NM_002305.3	LGALS1	22	hsa-miR-9*	1	0.371962	0.00910392	0.000306376
160377	NM_002305.3	LGALS1	22	hsa-miR-9*	5	0.371962	0.00910392	0.000306376
160377	NM_002305.3	LGALS1	22	hsa-miR-9*	15	0.371962	0.00910392	0.000306376
160470	NM_006963.3	ZNF22	10	hsa-miR-18b	X	0.428012	0.00100931	2.57545e-05
160470	NM_006963.3	ZNF22	10	hsa-miR-20b	X	0.429546	0.00100342	2.39141e-05
160470	NM_006963.3	ZNF22	10	hsa-miR-331	12	-0.382381	0.00790378	0.000199804
160470	NM_006963.3	ZNF22	10	hsa-miR-363	X	0.40064	0.00231382	9.11918e-05
160543	NM_012267.3	HSPBP1	19	hsa-miR-30a-5p	6	0.429009	0.00516983	2.45439e-05
160594	NM_207351.3	PRRT3	3	hsa-miR-98	X	0.377667	0.00906564	0.000242868
160682	NM_012426.3	SF3B3	16	hsa-miR-381	14	-0.498109	0.00521134	5.86522e-07
160703	NM_002338.2	LSAMP	3	hsa-miR-181a	1	-0.469617	0.000299426	3.01982e-06
160703	NM_002338.2	LSAMP	3	hsa-miR-181a	9	-0.469617	0.000299426	3.01982e-06
160703	NM_002338.2	LSAMP	3	hsa-miR-181b	1	-0.503694	7.89e-05	4.17913e-07
160703	NM_002338.2	LSAMP	3	hsa-miR-181b	9	-0.503694	7.89e-05	4.17913e-07
160703	NM_002338.2	LSAMP	3	hsa-miR-181c	19	-0.459962	0.000548471	5.09321e-06
160703	NM_002338.2	LSAMP	3	hsa-miR-20b	X	-0.355438	0.00959344	0.000586398
160703	NM_002338.2	LSAMP	3	hsa-miR-213	1	-0.37508	0.00916482	0.000269989
160703	NM_002338.2	LSAMP	3	hsa-miR-30a-5p	6	-0.538941	9.32e-05	4.25484e-08
160703	NM_002338.2	LSAMP	3	hsa-miR-30b	8	-0.418042	0.00767013	4.1341e-05
160703	NM_002338.2	LSAMP	3	hsa-miR-30d	8	-0.437445	0.00833741	1.62315e-05
160703	NM_002338.2	LSAMP	3	hsa-miR-331	12	0.470599	0.0007148	2.8609e-06
160703	NM_002338.2	LSAMP	3	hsa-miR-363	X	-0.366759	0.00613508	0.000377278
240189	NM_152274.2	FAM58A	5	hsa-miR-130a	11	-0.403375	0.00967873	8.07615e-05
240224	BX101252		14	hsa-miR-20b	X	-0.360599	0.00865905	0.000480562
240224	BX101252		14	hsa-miR-363	X	-0.353317	0.00874979	0.000635768
240240	NM_015328.1	KIAA0828	7	hsa-miR-9	1	0.41902	0.00325938	3.94916e-05
240240	NM_015328.1	KIAA0828	7	hsa-miR-9	5	0.41902	0.00325938	3.94916e-05
240240	NM_015328.1	KIAA0828	7	hsa-miR-9	15	0.41902	0.00325938	3.94916e-05
240240	NM_015328.1	KIAA0828	7	hsa-miR-9*	1	0.402471	0.00432299	8.40797e-05
240240	NM_015328.1	KIAA0828	7	hsa-miR-9*	5	0.402471	0.00432299	8.40797e-05
240240	NM_015328.1	KIAA0828	7	hsa-miR-9*	15	0.402471	0.00432299	8.40797e-05
240468	NM_058172.3	ANTXR2	4	hsa-miR-10a	17	0.447619	0.000645239	9.7125e-06
240468	NM_058172.3	ANTXR2	4	hsa-miR-181b	1	0.467245	0.000349174	3.4387e-06
240468	NM_058172.3	ANTXR2	4	hsa-miR-181b	9	0.467245	0.000349174	3.4387e-06
240468	NM_058172.3	ANTXR2	4	hsa-miR-18b	X	0.552422	3.79e-06	1.65375e-08
240468	NM_058172.3	ANTXR2	4	hsa-miR-20b	X	0.533544	1.09e-05	6.14054e-08
240468	NM_058172.3	ANTXR2	4	hsa-miR-221	X	0.384217	0.00674456	0.000185029
240468	NM_058172.3	ANTXR2	4	hsa-miR-339	7	0.468938	0.00101419	3.13453e-06
240468	NM_058172.3	ANTXR2	4	hsa-miR-34b	11	-0.448395	0.00704965	9.33308e-06
240468	NM_058172.3	ANTXR2	4	hsa-miR-363	X	0.560531	2.46e-06	9.17744e-09
240471	NM_001039933.1	CD79B	17	hsa-miR-181a	1	0.456208	0.000526615	6.21455e-06
240471	NM_001039933.1	CD79B	17	hsa-miR-181a	9	0.456208	0.000526615	6.21455e-06
240471	NM_001039933.1	CD79B	17	hsa-miR-181b	1	0.419609	0.00180481	3.84153e-05
240471	NM_001039933.1	CD79B	17	hsa-miR-181b	9	0.419609	0.00180481	3.84153e-05
240471	NM_001039933.1	CD79B	17	hsa-miR-181c	19	0.382585	0.00620956	0.00019811
240471	NM_001039933.1	CD79B	17	hsa-miR-20b	X	0.399723	0.0027064	9.49599e-05
240471	NM_001039933.1	CD79B	17	hsa-miR-213	1	0.47953	0.000355912	1.73621e-06
240471	NM_001039933.1	CD79B	17	hsa-miR-363	X	0.393874	0.00280237	0.000122603
240482	NM_003920.2	TIMELESS	12	hsa-miR-331	12	-0.525668	0.00019691	1.03699e-07
240482	NM_003920.2	TIMELESS	12	hsa-miR-551a	1	-0.452165	0.00633791	7.67971e-06
240487	NM_006027.3	EXO1	1	hsa-miR-331	12	-0.374479	0.00983846	0.000276677
240520	XM_001133149.1	LOC731486	11	hsa-miR-18b	X	0.353319	0.00964137	0.00063572
240520	XM_001133149.1	LOC731486	11	hsa-miR-363	X	0.351284	0.00932767	0.000686628
240564	NM_004237.2	TRIP13	5	hsa-miR-331	12	-0.465001	0.000778743	3.88486e-06
240564	NM_004237.2	TRIP13	5	hsa-miR-33b	17	0.403334	0.00859855	8.09093e-05
240564	NM_004237.2	TRIP13	5	hsa-miR-98	X	-0.437693	0.00247928	1.60327e-05
240600	XM_001131588.1	LOC389599	7	hsa-miR-10a	17	-0.4101	0.00231687	5.96394e-05
240600	XM_001131588.1	LOC389599	7	hsa-miR-151	8	0.442894	0.00315076	1.23537e-05
240753	NM_133491.2	SAT2	17	hsa-miR-331	12	0.418485	0.00286911	4.04935e-05
270068	NM_031942.4	CDCA7	2	hsa-miR-181b	1	0.37888	0.00596117	0.000231036
270068	NM_031942.4	CDCA7	2	hsa-miR-181b	9	0.37888	0.00596117	0.000231036
270068	NM_031942.4	CDCA7	2	hsa-miR-331	12	-0.449921	0.0012071	8.6272e-06
270068	NM_031942.4	CDCA7	2	hsa-miR-339	7	0.536109	9e-05	5.16218e-08
270068	NM_031942.4	CDCA7	2	hsa-miR-9	1	-0.385226	0.00751015	0.000177346
270068	NM_031942.4	CDCA7	2	hsa-miR-9	5	-0.385226	0.00751015	0.000177346
270068	NM_031942.4	CDCA7	2	hsa-miR-9	15	-0.385226	0.00751015	0.000177346
270068	NM_031942.4	CDCA7	2	hsa-miR-9*	1	-0.423047	0.00257978	3.26598e-05
270068	NM_031942.4	CDCA7	2	hsa-miR-9*	5	-0.423047	0.00257978	3.26598e-05
270068	NM_031942.4	CDCA7	2	hsa-miR-9*	15	-0.423047	0.00257978	3.26598e-05
270068	NM_031942.4	CDCA7	2	hsa-miR-98	X	-0.444452	0.00224696	1.14162e-05
270164	NM_001826.1	CKS1B	1	hsa-miR-10a	17	0.394478	0.00375685	0.000119437
270164	NM_001826.1	CKS1B	1	hsa-miR-130b	22	0.471847	0.00207102	2.6703e-06
270164	NM_001826.1	CKS1B	1	hsa-miR-18b	X	0.43352	0.000836112	1.97018e-05
270164	NM_001826.1	CKS1B	1	hsa-miR-20b	X	0.373483	0.00601644	0.000288097
270164	NM_001826.1	CKS1B	1	hsa-miR-331	12	-0.433328	0.00183324	1.98883e-05
270164	NM_001826.1	CKS1B	1	hsa-miR-363	X	0.371222	0.0054437	0.00031565
270167	NM_018309.1	TBC1D23	3	hsa-miR-213	1	-0.390878	0.0057906	0.000139491
270324	NM_000690.2	ALDH2	12	hsa-miR-10a	17	0.451965	0.000559111	7.76002e-06
270324	NM_000690.2	ALDH2	12	hsa-miR-130a	11	0.429033	0.00585364	2.45154e-05
270324	NM_000690.2	ALDH2	12	hsa-miR-181a	1	0.426936	0.00152572	2.71236e-05
270324	NM_000690.2	ALDH2	12	hsa-miR-181a	9	0.426936	0.00152572	2.71236e-05
270324	NM_000690.2	ALDH2	12	hsa-miR-181b	1	0.430919	0.0013371	2.23718e-05
270324	NM_000690.2	ALDH2	12	hsa-miR-181b	9	0.430919	0.0013371	2.23718e-05
270324	NM_000690.2	ALDH2	12	hsa-miR-181c	19	0.424879	0.00178678	2.99321e-05
270324	NM_000690.2	ALDH2	12	hsa-miR-18b	X	0.518196	2.04e-05	1.68423e-07
270324	NM_000690.2	ALDH2	12	hsa-miR-20b	X	0.477141	0.000151343	1.98712e-06
270324	NM_000690.2	ALDH2	12	hsa-miR-221	X	0.481835	0.000273343	1.52273e-06
270324	NM_000690.2	ALDH2	12	hsa-miR-222	X	0.485749	0.000265959	1.21594e-06
270324	NM_000690.2	ALDH2	12	hsa-miR-363	X	0.533301	9.34e-06	6.24187e-08
270341	NM_014767.1	SPOCK2	10	hsa-miR-98	X	0.451967	0.00191981	7.75921e-06
270358	NM_002601.2	PDE6D	2	hsa-miR-222	X	0.380707	0.008307	0.000214216
270400	NM_015184.3	PLCL2	3	hsa-miR-10a	17	-0.436869	0.000938669	1.67021e-05
270400	NM_015184.3	PLCL2	3	hsa-miR-130b	22	-0.438926	0.0048593	1.50777e-05
270400	NM_015184.3	PLCL2	3	hsa-miR-18b	X	-0.536025	7.91e-06	5.19172e-08
270400	NM_015184.3	PLCL2	3	hsa-miR-20b	X	-0.437218	0.000754788	1.64155e-05
270400	NM_015184.3	PLCL2	3	hsa-miR-363	X	-0.452039	0.000370975	7.73021e-06
270400	NM_015184.3	PLCL2	3	hsa-miR-486	8	-0.409392	0.00688531	6.15925e-05
270519	NM_030578.2	MGC4093	19	hsa-miR-18b	X	0.459785	0.000298204	5.14149e-06
270519	NM_030578.2	MGC4093	19	hsa-miR-20b	X	0.474902	0.000167375	2.25301e-06
270519	NM_030578.2	MGC4093	19	hsa-miR-363	X	0.386005	0.00355729	0.000171618
270593	NM_018664.1	SNFT	1	hsa-miR-10a	17	0.377931	0.0058562	0.000240246
270593	NM_018664.1	SNFT	1	hsa-miR-18b	X	0.374046	0.00544403	0.00028159
270600	NM_139173.2	NHEDC1	4	hsa-miR-365	16	-0.519285	0.00181035	1.57043e-07
270600	NM_139173.2	NHEDC1	4	hsa-miR-365	17	-0.519285	0.00181035	1.57043e-07
270722	NM_004930.1	CAPZB	1	hsa-miR-213	1	0.3862	0.0066629	0.000170211
290037	NM_018078.2	LARP2	4	hsa-miR-181a	1	-0.374138	0.00736423	0.000280539
290037	NM_018078.2	LARP2	4	hsa-miR-181a	9	-0.374138	0.00736423	0.000280539
290041	NM_001077621.1	VPS37D	7	hsa-miR-9*	1	-0.419326	0.00278555	3.8929e-05
290041	NM_001077621.1	VPS37D	7	hsa-miR-9*	5	-0.419326	0.00278555	3.8929e-05
290041	NM_001077621.1	VPS37D	7	hsa-miR-9*	15	-0.419326	0.00278555	3.8929e-05
290048	NM_001336.2	CTSZ	20	hsa-miR-126*	9	-0.463374	0.00690208	4.24185e-06
290091	NM_006759.3	UGP2	2	hsa-miR-221	X	0.402902	0.00405638	8.24822e-05
290091	NM_006759.3	UGP2	2	hsa-miR-222	X	0.382781	0.00789075	0.000196495
290131	NM_182922.2	HEATR3	16	hsa-miR-181a	1	-0.378871	0.00644726	0.000231122
290131	NM_182922.2	HEATR3	16	hsa-miR-181a	9	-0.378871	0.00644726	0.000231122
290148	XR_017692.1	LOC647121	1	hsa-miR-221	X	0.4786	0.000305813	1.8301e-06
290148	XR_017692.1	LOC647121	1	hsa-miR-222	X	0.491808	0.000222376	8.53588e-07
290193	NM_001042762.1	FIGNL1	7	hsa-miR-331	12	-0.419876	0.00277596	3.79365e-05
290239	NM_207127.1	PAOX	10	hsa-miR-34b	11	-0.46666	0.00541292	3.55011e-06
290386	NM_005873.2	RGS19	20	hsa-miR-181b	1	0.447753	0.000717562	9.64596e-06
290386	NM_005873.2	RGS19	20	hsa-miR-181b	9	0.447753	0.000717562	9.64596e-06
290386	NM_005873.2	RGS19	20	hsa-miR-181c	19	0.386355	0.00556062	0.0001691
290386	NM_005873.2	RGS19	20	hsa-miR-222	X	0.38535	0.00728654	0.000176423
290390	NM_016513.3	ICK	6	hsa-miR-181a	1	0.451941	0.000610199	7.7697e-06
290390	NM_016513.3	ICK	6	hsa-miR-181a	9	0.451941	0.000610199	7.7697e-06
290390	NM_016513.3	ICK	6	hsa-miR-181b	1	0.49139	0.000150215	8.74872e-07
290390	NM_016513.3	ICK	6	hsa-miR-181b	9	0.49139	0.000150215	8.74872e-07
290390	NM_016513.3	ICK	6	hsa-miR-181c	19	0.498529	0.000112009	5.7188e-07
290390	NM_016513.3	ICK	6	hsa-miR-213	1	0.403118	0.00414294	8.16922e-05
290390	NM_016513.3	ICK	6	hsa-miR-30a-5p	6	0.412433	0.00849258	5.36038e-05
290392	BX537514		12	hsa-miR-18b	X	-0.352374	0.00988366	0.000658915
290392	BX537514		12	hsa-miR-20b	X	-0.373903	0.00594223	0.00028323
290392	BX537514		12	hsa-miR-363	X	-0.36185	0.00706534	0.000457696
290452	NM_213674.1	TPM2	9	hsa-miR-10a	17	0.402247	0.00303339	8.49212e-05
290452	NM_213674.1	TPM2	9	hsa-miR-18b	X	0.389011	0.00368429	0.000151077
290452	NM_213674.1	TPM2	9	hsa-miR-20b	X	0.467765	0.000233024	3.34243e-06
290452	NM_213674.1	TPM2	9	hsa-miR-363	X	0.412906	0.00152857	5.24516e-05
290468	NM_024094.1	DCC1	8	hsa-miR-331	12	-0.4476	0.00130005	9.72197e-06
290538	NM_014034.2	ASF1A	6	hsa-miR-9	1	-0.418407	0.00327305	4.06415e-05
290538	NM_014034.2	ASF1A	6	hsa-miR-9	5	-0.418407	0.00327305	4.06415e-05
290538	NM_014034.2	ASF1A	6	hsa-miR-9	15	-0.418407	0.00327305	4.06415e-05
290538	NM_014034.2	ASF1A	6	hsa-miR-9*	1	-0.390828	0.00578887	0.00013979
290538	NM_014034.2	ASF1A	6	hsa-miR-9*	5	-0.390828	0.00578887	0.00013979
290538	NM_014034.2	ASF1A	6	hsa-miR-9*	15	-0.390828	0.00578887	0.00013979
290670	NM_015306.1	USP24	1	hsa-miR-10a	17	-0.369832	0.00730839	0.000333771
290670	NM_015306.1	USP24	1	hsa-miR-18b	X	-0.436276	0.00075196	1.72e-05
290670	NM_015306.1	USP24	1	hsa-miR-192	11	-0.438963	0.00383619	1.50499e-05
290670	NM_015306.1	USP24	1	hsa-miR-194	1	-0.40123	0.00878961	8.88413e-05
290670	NM_015306.1	USP24	1	hsa-miR-194	11	-0.40123	0.00878961	8.88413e-05
290670	NM_015306.1	USP24	1	hsa-miR-20b	X	-0.486138	9.98e-05	1.18888e-06
290670	NM_015306.1	USP24	1	hsa-miR-363	X	-0.511059	2.69e-05	2.64805e-07
360053	XM_001133189.1	INPP5A	10	hsa-miR-181a	1	0.436509	0.00113782	1.70028e-05
360053	XM_001133189.1	INPP5A	10	hsa-miR-181a	9	0.436509	0.00113782	1.70028e-05
360053	XM_001133189.1	INPP5A	10	hsa-miR-181b	1	0.428532	0.00141858	2.51163e-05
360053	XM_001133189.1	INPP5A	10	hsa-miR-181b	9	0.428532	0.00141858	2.51163e-05
360053	XM_001133189.1	INPP5A	10	hsa-miR-181c	19	0.415289	0.00243078	4.69897e-05
360053	XM_001133189.1	INPP5A	10	hsa-miR-18b	X	0.428983	0.000971822	2.45748e-05
360053	XM_001133189.1	INPP5A	10	hsa-miR-20b	X	0.450067	0.000479022	8.56236e-06
360053	XM_001133189.1	INPP5A	10	hsa-miR-213	1	0.425037	0.00220023	2.97071e-05
360053	XM_001133189.1	INPP5A	10	hsa-miR-363	X	0.447758	0.000449909	9.64349e-06
360133	NM_178448.2	C9orf140	9	hsa-miR-130b	22	0.466165	0.00207102	3.64703e-06
360133	NM_178448.2	C9orf140	9	hsa-miR-18b	X	0.372038	0.00580097	0.000305438
360136	NM_005647.2	TBL1X	X	hsa-miR-18b	X	0.391118	0.0034318	0.000138062
360136	NM_005647.2	TBL1X	X	hsa-miR-339	7	0.458705	0.00135669	5.44555e-06
360136	NM_005647.2	TBL1X	X	hsa-miR-363	X	0.386433	0.00351956	0.000168543
360136	NM_005647.2	TBL1X	X	hsa-miR-9	1	-0.380551	0.00827575	0.000215607
360136	NM_005647.2	TBL1X	X	hsa-miR-9	5	-0.380551	0.00827575	0.000215607
360136	NM_005647.2	TBL1X	X	hsa-miR-9	15	-0.380551	0.00827575	0.000215607
360136	NM_005647.2	TBL1X	X	hsa-miR-9*	1	-0.385387	0.00646402	0.000176148
360136	NM_005647.2	TBL1X	X	hsa-miR-9*	5	-0.385387	0.00646402	0.000176148
360136	NM_005647.2	TBL1X	X	hsa-miR-9*	15	-0.385387	0.00646402	0.000176148
360187	NM_206831.1	DPH3	3	hsa-miR-331	12	0.396918	0.00524201	0.000107402
360187	NM_206831.1	DPH3	3	hsa-miR-9	1	0.387951	0.00698816	0.000158045
360187	NM_206831.1	DPH3	3	hsa-miR-9	5	0.387951	0.00698816	0.000158045
360187	NM_206831.1	DPH3	3	hsa-miR-9	15	0.387951	0.00698816	0.000158045
360187	NM_206831.1	DPH3	3	hsa-miR-9*	1	0.434308	0.00197123	1.89538e-05
360187	NM_206831.1	DPH3	3	hsa-miR-9*	5	0.434308	0.00197123	1.89538e-05
360187	NM_206831.1	DPH3	3	hsa-miR-9*	15	0.434308	0.00197123	1.89538e-05
360187	NM_206831.1	DPH3	3	hsa-miR-98	X	0.397695	0.0057629	0.000103812
360193	NM_176812.3	CHMP4B	20	hsa-miR-331	12	0.409998	0.00362337	5.99172e-05
360193	NM_176812.3	CHMP4B	20	hsa-miR-98	X	0.393299	0.00638317	0.00012569
360204	NM_020177.2	FEM1C	5	hsa-miR-30b	8	-0.422035	0.00732597	3.42643e-05
360343	NM_005103.3	FEZ1	11	hsa-miR-221	X	0.393582	0.00519863	0.000124162
360463	NM_018838.3	NDUFA12	12	hsa-miR-9	1	0.461302	0.00109148	4.74129e-06
360463	NM_018838.3	NDUFA12	12	hsa-miR-9	5	0.461302	0.00109148	4.74129e-06
360463	NM_018838.3	NDUFA12	12	hsa-miR-9	15	0.461302	0.00109148	4.74129e-06
360463	NM_018838.3	NDUFA12	12	hsa-miR-9*	1	0.484249	0.000433377	1.32588e-06
360463	NM_018838.3	NDUFA12	12	hsa-miR-9*	5	0.484249	0.000433377	1.32588e-06
360463	NM_018838.3	NDUFA12	12	hsa-miR-9*	15	0.484249	0.000433377	1.32588e-06
360544	NM_002642.3	PIGC	1	hsa-miR-139	11	-0.450207	0.00748037	8.50061e-06
360544	NM_002642.3	PIGC	1	hsa-miR-181b	1	0.394916	0.00380291	0.000117189
360544	NM_002642.3	PIGC	1	hsa-miR-181b	9	0.394916	0.00380291	0.000117189
360544	NM_002642.3	PIGC	1	hsa-miR-181c	19	0.389987	0.00508661	0.000144913
360600	NM_181877.3	ZSCAN2	15	hsa-miR-363	X	-0.372505	0.00527221	0.000299731
360600	NM_181877.3	ZSCAN2	15	hsa-miR-9	1	0.378847	0.00848298	0.000231351
360600	NM_181877.3	ZSCAN2	15	hsa-miR-9	5	0.378847	0.00848298	0.000231351
360600	NM_181877.3	ZSCAN2	15	hsa-miR-9	15	0.378847	0.00848298	0.000231351
360600	NM_181877.3	ZSCAN2	15	hsa-miR-9*	1	0.405942	0.00404364	7.19905e-05
360600	NM_181877.3	ZSCAN2	15	hsa-miR-9*	5	0.405942	0.00404364	7.19905e-05
360600	NM_181877.3	ZSCAN2	15	hsa-miR-9*	15	0.405942	0.00404364	7.19905e-05
360639	NM_002436.2	MPP1	X	hsa-miR-18b	X	0.369898	0.00614903	0.00033289
360639	NM_002436.2	MPP1	X	hsa-miR-213	1	0.426856	0.0021328	2.72281e-05
360639	NM_002436.2	MPP1	X	hsa-miR-363	X	0.349753	0.00971755	0.000727353
360671	NM_012329.2	MMD	17	hsa-miR-625	14	-0.444834	0.00488398	1.11968e-05
360685	NM_001039091.1	PRPS2	X	HS_200	12	0.484128	0.00259077	1.33514e-06
360685	NM_001039091.1	PRPS2	X	hsa-miR-9	1	-0.449621	0.00141928	8.76188e-06
360685	NM_001039091.1	PRPS2	X	hsa-miR-9	5	-0.449621	0.00141928	8.76188e-06
360685	NM_001039091.1	PRPS2	X	hsa-miR-9	15	-0.449621	0.00141928	8.76188e-06
360685	NM_001039091.1	PRPS2	X	hsa-miR-9*	1	-0.424035	0.0025693	3.11612e-05
360685	NM_001039091.1	PRPS2	X	hsa-miR-9*	5	-0.424035	0.0025693	3.11612e-05
360685	NM_001039091.1	PRPS2	X	hsa-miR-9*	15	-0.424035	0.0025693	3.11612e-05
380019	NM_012247.3	SEPHS1	10	hsa-miR-331	12	-0.390588	0.00606578	0.000141235
380041	NM_001035254.1	FAM102A	9	hsa-miR-181a	1	-0.485619	0.000166683	1.22512e-06
380041	NM_001035254.1	FAM102A	9	hsa-miR-181a	9	-0.485619	0.000166683	1.22512e-06
380041	NM_001035254.1	FAM102A	9	hsa-miR-181b	1	-0.449827	0.000676581	8.66919e-06
380041	NM_001035254.1	FAM102A	9	hsa-miR-181b	9	-0.449827	0.000676581	8.66919e-06
380041	NM_001035254.1	FAM102A	9	hsa-miR-181c	19	-0.453739	0.000682518	7.07444e-06
380041	NM_001035254.1	FAM102A	9	hsa-miR-20b	X	-0.42804	0.00105004	2.57198e-05
380041	NM_001035254.1	FAM102A	9	hsa-miR-30b	8	-0.41172	0.0089042	5.53851e-05
380041	NM_001035254.1	FAM102A	9	hsa-miR-339	7	-0.385558	0.0087642	0.000174884
380041	NM_001035254.1	FAM102A	9	hsa-miR-363	X	-0.397866	0.00245229	0.000103037
380068	NM_025126.2	RNF34	12	hsa-miR-18b	X	-0.386262	0.00391389	0.000169765
380068	NM_025126.2	RNF34	12	hsa-miR-20b	X	-0.405378	0.00223068	7.3838e-05
380068	NM_025126.2	RNF34	12	hsa-miR-222	X	-0.407385	0.00401241	6.74573e-05
380068	NM_025126.2	RNF34	12	hsa-miR-363	X	-0.430044	0.000860233	2.33435e-05
380072	NM_080658.1	ACY3	11	hsa-miR-20b	X	-0.42241	0.00129826	3.36614e-05
380072	NM_080658.1	ACY3	11	hsa-miR-363	X	-0.43504	0.000727182	1.82828e-05
380372	NM_005009.2	NME4	16	hsa-miR-20b	X	0.372181	0.00622713	0.00030368
380386	NM_058166.3	TRIM6	11	hsa-miR-130a	11	0.426802	0.00585364	2.72988e-05
380386	NM_058166.3	TRIM6	11	hsa-miR-222	X	0.394865	0.00558596	0.000117448
380386	NM_058166.3	TRIM6	11	hsa-miR-339	7	0.402804	0.00580466	8.28429e-05
380504	NM_014394.2	GHITM	10	hsa-miR-181a	1	-0.421996	0.00175584	3.43276e-05
380504	NM_014394.2	GHITM	10	hsa-miR-181a	9	-0.421996	0.00175584	3.43276e-05
380504	NM_014394.2	GHITM	10	hsa-miR-181b	1	-0.455642	0.000521213	6.40251e-06
380504	NM_014394.2	GHITM	10	hsa-miR-181b	9	-0.455642	0.000521213	6.40251e-06
380504	NM_014394.2	GHITM	10	hsa-miR-181c	19	-0.444375	0.0008593	1.14609e-05
380504	NM_014394.2	GHITM	10	hsa-miR-213	1	-0.392657	0.00547453	0.000129221
380504	NM_014394.2	GHITM	10	hsa-miR-30d	8	-0.440231	0.00833741	1.41252e-05
380504	NM_014394.2	GHITM	10	hsa-miR-363	X	-0.36468	0.00647023	0.000409603
380537	NM_005702.2	ERAL1	17	hsa-miR-10a	17	-0.357683	0.00983923	0.000537983
380541	NM_003971.3	SPAG9	17	hsa-miR-30b	8	-0.423155	0.00732597	3.24928e-05
380563	NM_016510.3	SCLY	2	hsa-miR-181b	1	0.381892	0.00545379	0.000203918
380563	NM_016510.3	SCLY	2	hsa-miR-181b	9	0.381892	0.00545379	0.000203918
380672	NM_001081562.1	DMPK	19	hsa-miR-331	12	0.394613	0.00554988	0.00011874
380682	NM_005354.3	JUND	19	hsa-miR-181a	1	-0.386543	0.00519745	0.000167761
380682	NM_005354.3	JUND	19	hsa-miR-181a	9	-0.386543	0.00519745	0.000167761
380682	NM_005354.3	JUND	19	hsa-miR-20b	X	-0.387936	0.00386345	0.000158146
380682	NM_005354.3	JUND	19	hsa-miR-213	1	-0.372413	0.00973704	0.000300848
380682	NM_005354.3	JUND	19	hsa-miR-30b	8	-0.540985	0.000314047	3.69667e-08
380731	NM_006000.1	TUBA4A	2	hsa-miR-10a	17	0.390758	0.00420636	0.00014021
380731	NM_006000.1	TUBA4A	2	hsa-miR-181a	1	0.381852	0.00590749	0.000204258
380731	NM_006000.1	TUBA4A	2	hsa-miR-181a	9	0.381852	0.00590749	0.000204258
380731	NM_006000.1	TUBA4A	2	hsa-miR-18b	X	0.611774	9.3e-08	1.49709e-10
380731	NM_006000.1	TUBA4A	2	hsa-miR-192	11	0.418921	0.00567906	3.96752e-05
380731	NM_006000.1	TUBA4A	2	hsa-miR-20b	X	0.659135	2.46e-09	1.62869e-12
380731	NM_006000.1	TUBA4A	2	hsa-miR-363	X	0.66538	1.49e-09	8.44085e-13
380731	NM_006000.1	TUBA4A	2	hsa-miR-9*	1	-0.38068	0.00721571	0.000214456
380731	NM_006000.1	TUBA4A	2	hsa-miR-9*	5	-0.38068	0.00721571	0.000214456
380731	NM_006000.1	TUBA4A	2	hsa-miR-9*	15	-0.38068	0.00721571	0.000214456
380736	NM_003703.1	NOL14	4	hsa-miR-10a	17	-0.390163	0.00425419	0.000143827
380736	NM_003703.1	NOL14	4	hsa-miR-18b	X	-0.416323	0.00156491	4.47887e-05
380736	NM_003703.1	NOL14	4	hsa-miR-20b	X	-0.45974	0.000315434	5.15384e-06
380736	NM_003703.1	NOL14	4	hsa-miR-363	X	-0.468601	0.000193115	3.19298e-06
430093	XM_937968.2	LOC401115	4	HS_200	12	-0.429265	0.00933511	2.42417e-05
430215	NM_001005404.3	YPEL2	17	hsa-miR-181a	1	0.377611	0.00666135	0.000243427
430215	NM_001005404.3	YPEL2	17	hsa-miR-181a	9	0.377611	0.00666135	0.000243427
430215	NM_001005404.3	YPEL2	17	hsa-miR-181b	1	0.415658	0.00204796	4.61929e-05
430215	NM_001005404.3	YPEL2	17	hsa-miR-181b	9	0.415658	0.00204796	4.61929e-05
430215	NM_001005404.3	YPEL2	17	hsa-miR-181c	19	0.416203	0.00239758	4.50391e-05
430279	NM_018140.3	CEP72	5	hsa-miR-551a	1	-0.431151	0.00926776	2.21205e-05
430369	NM_001012968.2	SPIN4	X	hsa-miR-18b	X	0.386393	0.00391389	0.000168828
430369	NM_001012968.2	SPIN4	X	hsa-miR-20b	X	0.359471	0.00881862	0.000502072
430369	NM_001012968.2	SPIN4	X	hsa-miR-331	12	-0.493738	0.000314352	7.61514e-07
430369	NM_001012968.2	SPIN4	X	hsa-miR-9	1	-0.372797	0.00985939	0.000296213
430369	NM_001012968.2	SPIN4	X	hsa-miR-9	5	-0.372797	0.00985939	0.000296213
430369	NM_001012968.2	SPIN4	X	hsa-miR-9	15	-0.372797	0.00985939	0.000296213
430369	NM_001012968.2	SPIN4	X	hsa-miR-9*	1	-0.41931	0.00278555	3.89582e-05
430369	NM_001012968.2	SPIN4	X	hsa-miR-9*	5	-0.41931	0.00278555	3.89582e-05
430369	NM_001012968.2	SPIN4	X	hsa-miR-9*	15	-0.41931	0.00278555	3.89582e-05
430369	NM_001012968.2	SPIN4	X	hsa-miR-98	X	-0.505556	0.00046114	3.72757e-07
430634	XM_936043.1	LOC641996	7	hsa-miR-139	11	0.438838	0.00901906	1.5144e-05
450114	NM_153236.3	GIMAP7	7	hsa-miR-151	8	0.462716	0.00144118	4.39482e-06
450603	NM_001287.3	CLCN7	16	hsa-miR-222	X	-0.375284	0.00952777	0.000267753
460072	NM_080668.2	CDCA5	11	hsa-miR-331	12	-0.38909	0.00639987	0.000150569
460072	NM_080668.2	CDCA5	11	hsa-miR-98	X	-0.374992	0.00959835	0.000270959
460093	NM_182666.1	UBE2E1	3	hsa-miR-181b	1	0.426976	0.00147387	2.70715e-05
460093	NM_182666.1	UBE2E1	3	hsa-miR-181b	9	0.426976	0.00147387	2.70715e-05
460093	NM_182666.1	UBE2E1	3	hsa-miR-221	X	0.419324	0.00254839	3.89327e-05
460093	NM_182666.1	UBE2E1	3	hsa-miR-222	X	0.40271	0.00466973	8.31903e-05
460093	NM_182666.1	UBE2E1	3	hsa-miR-30b	8	0.473035	0.00223492	2.50004e-06
460333	NM_015941.2	ATP6V1H	8	hsa-miR-98	X	0.375181	0.00959835	0.00026888
460373	NM_006893.2	LGTN	1	hsa-miR-10a	17	-0.470103	0.00028489	2.94016e-06
460373	NM_006893.2	LGTN	1	hsa-miR-18b	X	-0.402827	0.00235331	8.27581e-05
460373	NM_006893.2	LGTN	1	hsa-miR-20b	X	-0.362388	0.00823918	0.000448172
460373	NM_006893.2	LGTN	1	hsa-miR-363	X	-0.384419	0.00371235	0.000183467
460373	NM_006893.2	LGTN	1	hsa-miR-486	8	-0.407634	0.00702806	6.67025e-05
460450	NM_178558.3	ZNF680	7	hsa-miR-9	1	-0.382954	0.0078906	0.00019508
460450	NM_178558.3	ZNF680	7	hsa-miR-9	5	-0.382954	0.0078906	0.00019508
460450	NM_178558.3	ZNF680	7	hsa-miR-9	15	-0.382954	0.0078906	0.00019508
460450	NM_178558.3	ZNF680	7	hsa-miR-98	X	-0.408594	0.0047161	6.38651e-05
460601	NM_004801.3	NRXN1	2	hsa-miR-30b	8	-0.406255	0.00956173	7.09838e-05
460608	NM_006573.3	TNFSF13B	13	hsa-miR-10a	17	0.382327	0.00513113	0.000200254
460630	NM_003684.3	MKNK1	1	hsa-miR-625	14	-0.416888	0.00789785	4.3627e-05
460754	NM_021872.2	CDC25B	20	hsa-miR-130b	22	0.417993	0.00711531	4.14358e-05
460754	NM_021872.2	CDC25B	20	hsa-miR-18b	X	0.478833	0.00013664	1.80614e-06
460754	NM_021872.2	CDC25B	20	hsa-miR-20b	X	0.357561	0.00913156	0.000540516
460754	NM_021872.2	CDC25B	20	hsa-miR-331	12	-0.436561	0.00170733	1.6959e-05
460754	NM_021872.2	CDC25B	20	hsa-miR-363	X	0.402229	0.00217522	8.49892e-05
460754	NM_021872.2	CDC25B	20	hsa-miR-9*	1	-0.382597	0.00691685	0.000198011
460754	NM_021872.2	CDC25B	20	hsa-miR-9*	5	-0.382597	0.00691685	0.000198011
460754	NM_021872.2	CDC25B	20	hsa-miR-9*	15	-0.382597	0.00691685	0.000198011
460754	NM_021872.2	CDC25B	20	hsa-miR-98	X	-0.398354	0.00569633	0.000100855
510025	NM_015116.1	LRCH1	13	hsa-miR-221	X	-0.39449	0.00511336	0.000119375
510025	NM_015116.1	LRCH1	13	hsa-miR-222	X	-0.416004	0.00307902	4.54572e-05
510039	NM_002583.2	PAWR	12	hsa-miR-221	X	-0.473299	0.000362917	2.46362e-06
510039	NM_002583.2	PAWR	12	hsa-miR-222	X	-0.495676	0.000196975	6.78572e-07
510128	NM_004419.3	DUSP5	10	hsa-miR-222	X	0.38628	0.00716456	0.000169636
510187	NM_014301.2	ISCU	12	hsa-miR-33b	17	-0.391793	0.00995439	0.000134118
510187	NM_014301.2	ISCU	12	hsa-miR-98	X	0.420654	0.00350733	3.65729e-05
510326	NM_020524.2	PBXIP1	1	hsa-miR-98	X	0.481495	0.000960388	1.55258e-06
510528	NM_001025367.1	VEGFA	6	hsa-miR-33b	17	0.397555	0.00930292	0.00010445
510544	NM_000791.3	DHFR	5	hsa-miR-331	12	-0.511296	0.000245303	2.60899e-07
510544	NM_000791.3	DHFR	5	hsa-miR-98	X	-0.374539	0.00967687	0.000276003
510632	NM_001018020.1	TPM1	15	hsa-miR-181a	1	0.420976	0.00181236	3.6022e-05
510632	NM_001018020.1	TPM1	15	hsa-miR-181a	9	0.420976	0.00181236	3.6022e-05
510632	NM_001018020.1	TPM1	15	hsa-miR-181c	19	0.386841	0.00550555	0.00016566
510632	NM_001018020.1	TPM1	15	hsa-miR-213	1	0.41157	0.00332417	5.57668e-05
510681	NM_004302.3	ACVR1B	12	hsa-miR-181b	1	0.412522	0.00229154	5.33852e-05
510681	NM_004302.3	ACVR1B	12	hsa-miR-181b	9	0.412522	0.00229154	5.33852e-05
510681	NM_004302.3	ACVR1B	12	hsa-miR-181c	19	0.398801	0.00387787	9.88937e-05
510681	NM_004302.3	ACVR1B	12	hsa-miR-221	X	0.693312	3.39e-10	3.64379e-14
510681	NM_004302.3	ACVR1B	12	hsa-miR-222	X	0.7221	9.77e-12	9.62073e-16
510681	NM_004302.3	ACVR1B	12	hsa-miR-339	7	0.401108	0.0061817	8.93227e-05
510681	NM_004302.3	ACVR1B	12	hsa-miR-363	X	0.359153	0.00760714	0.000508294
510687	NM_024613.2	PLEKHF2	8	hsa-miR-151	8	0.414413	0.00813914	4.89328e-05
510725	NM_003904.3	ZNF259	11	hsa-miR-9	1	0.379448	0.00839153	0.000225681
510725	NM_003904.3	ZNF259	11	hsa-miR-9	5	0.379448	0.00839153	0.000225681
510725	NM_003904.3	ZNF259	11	hsa-miR-9	15	0.379448	0.00839153	0.000225681
510725	NM_003904.3	ZNF259	11	hsa-miR-9*	1	0.409284	0.00363671	6.18956e-05
510725	NM_003904.3	ZNF259	11	hsa-miR-9*	5	0.409284	0.00363671	6.18956e-05
510725	NM_003904.3	ZNF259	11	hsa-miR-9*	15	0.409284	0.00363671	6.18956e-05
510768	NM_014747.2	RIMS3	1	hsa-miR-10a	17	0.453513	0.000531182	7.1585e-06
510768	NM_014747.2	RIMS3	1	hsa-miR-194	1	0.416796	0.00608004	4.38142e-05
510768	NM_014747.2	RIMS3	1	hsa-miR-194	11	0.416796	0.00608004	4.38142e-05
510768	NM_014747.2	RIMS3	1	hsa-miR-20b	X	0.380544	0.00482968	0.000215669
510768	NM_014747.2	RIMS3	1	hsa-miR-363	X	0.355844	0.00828651	0.000577357
520079	NM_002194.2	INPP1	2	hsa-miR-331	12	0.402947	0.00448138	8.2317e-05
520079	NM_002194.2	INPP1	2	hsa-miR-9*	1	0.375492	0.00823049	0.000265491
520079	NM_002194.2	INPP1	2	hsa-miR-9*	5	0.375492	0.00823049	0.000265491
520079	NM_002194.2	INPP1	2	hsa-miR-9*	15	0.375492	0.00823049	0.000265491
520079	NM_002194.2	INPP1	2	hsa-miR-98	X	0.397262	0.00583574	0.000105799
520204	NM_001002860.2	BTBD7	14	hsa-miR-10a	17	0.395721	0.00364244	0.000113158
520204	NM_001002860.2	BTBD7	14	hsa-miR-18b	X	0.388543	0.00368765	0.000154118
520204	NM_001002860.2	BTBD7	14	hsa-miR-20b	X	0.369491	0.00670297	0.000338361
520204	NM_001002860.2	BTBD7	14	hsa-miR-363	X	0.39958	0.00238896	9.55603e-05
520327	XM_928619.1	LOC645609	1	hsa-miR-139	11	0.4358	0.00901906	1.76097e-05
520333	NM_138957.2	MAPK1	22	hsa-miR-10a	17	-0.474711	0.000242998	2.27718e-06
520333	NM_138957.2	MAPK1	22	hsa-miR-151	8	0.457927	0.00176036	5.67498e-06
520333	NM_138957.2	MAPK1	22	hsa-miR-486	8	-0.415559	0.00582711	4.64054e-05
520360	NM_020448.3	NPAL3	1	hsa-miR-10a	17	-0.532535	2.22e-05	6.57181e-08
520360	NM_020448.3	NPAL3	1	hsa-miR-151	8	0.486439	0.000799526	1.16832e-06
520360	NM_020448.3	NPAL3	1	hsa-miR-486	8	-0.426316	0.00437929	2.79431e-05
520544	NM_001012753.1	ZNF763	19	hsa-miR-98	X	-0.442114	0.00230064	1.28497e-05
540113	NM_024684.2	C11orf67	11	hsa-miR-181a	1	0.408217	0.00271411	6.49657e-05
540113	NM_024684.2	C11orf67	11	hsa-miR-181a	9	0.408217	0.00271411	6.49657e-05
540113	NM_024684.2	C11orf67	11	hsa-miR-181b	1	0.440451	0.000916141	1.39703e-05
540113	NM_024684.2	C11orf67	11	hsa-miR-181b	9	0.440451	0.000916141	1.39703e-05
540113	NM_024684.2	C11orf67	11	hsa-miR-181c	19	0.389623	0.00512784	0.000147184
540113	NM_024684.2	C11orf67	11	hsa-miR-18b	X	0.363526	0.00724073	0.000428624
540113	NM_024684.2	C11orf67	11	hsa-miR-213	1	0.430536	0.00187719	2.27924e-05
540139	NM_020478.3	ANK1	8	hsa-miR-10a	17	0.425476	0.00136559	2.90902e-05
540139	NM_020478.3	ANK1	8	hsa-miR-18b	X	0.445693	0.000526807	1.07177e-05
540139	NM_020478.3	ANK1	8	hsa-miR-192	11	0.411231	0.00704249	5.66385e-05
540139	NM_020478.3	ANK1	8	hsa-miR-20b	X	0.436667	0.000761577	1.68702e-05
540139	NM_020478.3	ANK1	8	hsa-miR-215	1	0.469179	0.00376927	3.09336e-06
540139	NM_020478.3	ANK1	8	hsa-miR-363	X	0.470815	0.000175795	2.82702e-06
540139	NM_020478.3	ANK1	8	hsa-miR-486	8	0.561855	3.81e-05	8.32359e-09
540204	NM_002114.2	HIVEP1	6	hsa-miR-221	X	-0.380471	0.00755897	0.000216323
540204	NM_002114.2	HIVEP1	6	hsa-miR-222	X	-0.401944	0.00475261	8.6072e-05
540241	NM_003809.2	TNFSF12	17	hsa-miR-18b	X	0.364201	0.00712028	0.000417402
540241	NM_003809.2	TNFSF12	17	hsa-miR-20b	X	0.362484	0.00823918	0.000446492
540241	NM_003809.2	TNFSF12	17	hsa-miR-363	X	0.42052	0.00117324	3.68045e-05
540292	NM_022036.2	GPRC5C	17	hsa-miR-10a	17	0.387875	0.00447345	0.000158556
540292	NM_022036.2	GPRC5C	17	hsa-miR-18b	X	0.45157	0.000426108	7.92094e-06
540292	NM_022036.2	GPRC5C	17	hsa-miR-20b	X	0.438296	0.000730631	1.55588e-05
540292	NM_022036.2	GPRC5C	17	hsa-miR-363	X	0.454706	0.000333619	6.72513e-06
540348	NM_022495.5	C14orf135	14	hsa-miR-363	X	-0.364767	0.00646999	0.000408201
540397	NM_020342.1	SLC39A10	2	hsa-miR-18b	X	0.363543	0.00724073	0.000428338
540397	NM_020342.1	SLC39A10	2	hsa-miR-221	X	0.446513	0.000984906	1.02783e-05
540397	NM_020342.1	SLC39A10	2	hsa-miR-222	X	0.4082	0.0039086	6.50158e-05
540470	NM_018090.3	NECAP2	1	HS_188	12	-0.444998	0.00983762	1.11038e-05
540470	NM_018090.3	NECAP2	1	HS_200	12	-0.445417	0.00848104	1.08695e-05
540470	NM_018090.3	NECAP2	1	hsa-miR-9	1	0.531568	0.000105415	7.01207e-08
540470	NM_018090.3	NECAP2	1	hsa-miR-9	5	0.531568	0.000105415	7.01207e-08
540470	NM_018090.3	NECAP2	1	hsa-miR-9	15	0.531568	0.000105415	7.01207e-08
540470	NM_018090.3	NECAP2	1	hsa-miR-9*	1	0.512103	0.00015132	2.48004e-07
540470	NM_018090.3	NECAP2	1	hsa-miR-9*	5	0.512103	0.00015132	2.48004e-07
540470	NM_018090.3	NECAP2	1	hsa-miR-9*	15	0.512103	0.00015132	2.48004e-07
540470	NM_018090.3	NECAP2	1	hsa-miR-98	X	0.377397	0.00908841	0.000245576
540491	NM_018639.3	WSB2	12	hsa-miR-10a	17	-0.394579	0.00375457	0.000118915
540491	NM_018639.3	WSB2	12	hsa-miR-130b	22	-0.410691	0.00794244	5.80533e-05
540491	NM_018639.3	WSB2	12	hsa-miR-181b	1	-0.377475	0.00618084	0.000244791
540491	NM_018639.3	WSB2	12	hsa-miR-181b	9	-0.377475	0.00618084	0.000244791
540491	NM_018639.3	WSB2	12	hsa-miR-181c	19	-0.376522	0.00715793	0.000254546
540491	NM_018639.3	WSB2	12	hsa-miR-18b	X	-0.361751	0.00762847	0.000459468
540491	NM_018639.3	WSB2	12	hsa-miR-363	X	-0.40669	0.00186817	6.96064e-05
540746	NM_198186.2	ASTN2	9	hsa-miR-130b	22	-0.42946	0.00546626	2.40139e-05
540746	NM_198186.2	ASTN2	9	hsa-miR-18b	X	-0.375528	0.00524973	0.000265101
540762	NM_145018.2	C11orf82	11	hsa-miR-551a	1	-0.430836	0.00926776	2.24623e-05
580050	NM_016616.3	TXNDC3	7	hsa-miR-151	8	0.416488	0.00750187	4.44465e-05
580072	NM_002087.2	GRN	17	hsa-miR-181a	1	-0.363889	0.00949263	0.000422555
580072	NM_002087.2	GRN	17	hsa-miR-181a	9	-0.363889	0.00949263	0.000422555
580072	NM_002087.2	GRN	17	hsa-miR-181b	1	-0.384189	0.00510862	0.000185247
580072	NM_002087.2	GRN	17	hsa-miR-181b	9	-0.384189	0.00510862	0.000185247
580091	XM_928275.1	LOC645236	9	hsa-miR-10a	17	-0.404371	0.00285611	7.72467e-05
580091	XM_928275.1	LOC645236	9	hsa-miR-130a	11	-0.413097	0.00817453	5.1993e-05
580091	XM_928275.1	LOC645236	9	hsa-miR-181a	1	-0.436723	0.00113646	1.68234e-05
580091	XM_928275.1	LOC645236	9	hsa-miR-181a	9	-0.436723	0.00113646	1.68234e-05
580091	XM_928275.1	LOC645236	9	hsa-miR-181b	1	-0.483708	0.000195706	1.36778e-06
580091	XM_928275.1	LOC645236	9	hsa-miR-181b	9	-0.483708	0.000195706	1.36778e-06
580091	XM_928275.1	LOC645236	9	hsa-miR-181c	19	-0.445762	0.000827199	1.068e-05
580091	XM_928275.1	LOC645236	9	hsa-miR-18b	X	-0.520286	1.86e-05	1.4723e-07
580091	XM_928275.1	LOC645236	9	hsa-miR-20b	X	-0.479289	0.000138712	1.7601e-06
580091	XM_928275.1	LOC645236	9	hsa-miR-221	X	-0.422189	0.00237698	3.40155e-05
580091	XM_928275.1	LOC645236	9	hsa-miR-222	X	-0.393737	0.00580108	0.000123332
580091	XM_928275.1	LOC645236	9	hsa-miR-30a-5p	6	-0.549255	7.57e-05	2.0726e-08
580091	XM_928275.1	LOC645236	9	hsa-miR-30b	8	-0.498325	0.00089962	5.78948e-07
580091	XM_928275.1	LOC645236	9	hsa-miR-30d	8	-0.495514	0.00304364	6.85163e-07
580091	XM_928275.1	LOC645236	9	hsa-miR-363	X	-0.498992	5.12e-05	5.56141e-07
580167	NM_152354.3	ZNF285A	19	hsa-miR-339	7	0.383336	0.00909101	0.000191988
580280	NM_000126.2	ETFA	15	hsa-miR-221	X	-0.405489	0.00373179	7.34709e-05
580280	NM_000126.2	ETFA	15	hsa-miR-222	X	-0.405617	0.0042654	7.30498e-05
580280	NM_000126.2	ETFA	15	hsa-miR-551b	3	0.458836	0.00347769	5.40779e-06
580280	NM_000126.2	ETFA	15	hsa-miR-9	1	0.437663	0.00198967	1.60566e-05
580280	NM_000126.2	ETFA	15	hsa-miR-9	5	0.437663	0.00198967	1.60566e-05
580280	NM_000126.2	ETFA	15	hsa-miR-9	15	0.437663	0.00198967	1.60566e-05
580280	NM_000126.2	ETFA	15	hsa-miR-9*	1	0.471286	0.000644366	2.75445e-06
580280	NM_000126.2	ETFA	15	hsa-miR-9*	5	0.471286	0.000644366	2.75445e-06
580280	NM_000126.2	ETFA	15	hsa-miR-9*	15	0.471286	0.000644366	2.75445e-06
580280	NM_000126.2	ETFA	15	hsa-miR-98	X	0.423108	0.00335727	3.25653e-05
580292	NM_020347.2	LZTFL1	3	hsa-miR-20b	X	-0.358204	0.00898313	0.000527283
580367	NM_004508.2	IDI1	10	hsa-miR-181c	19	-0.421364	0.00199682	3.53685e-05
580368	NM_006263.2	PSME1	14	hsa-miR-34b	11	-0.449095	0.00704965	9.0028e-06
580411	NM_174928.1	N6AMT2	13	HS_244	16	-0.546252	0.000266631	2.56184e-08
580411	NM_174928.1	N6AMT2	13	HS_244	16	-0.546252	0.000266631	2.56184e-08
580411	NM_174928.1	N6AMT2	13	hsa-miR-213	1	-0.375623	0.00900216	0.000264075
580437	NM_003033.2	ST3GAL1	8	hsa-miR-181b	1	0.445802	0.000762506	1.06583e-05
580437	NM_003033.2	ST3GAL1	8	hsa-miR-181b	9	0.445802	0.000762506	1.06583e-05
580437	NM_003033.2	ST3GAL1	8	hsa-miR-181c	19	0.481603	0.000209591	1.54304e-06
580437	NM_003033.2	ST3GAL1	8	hsa-miR-221	X	0.414336	0.00288892	4.91071e-05
580437	NM_003033.2	ST3GAL1	8	hsa-miR-222	X	0.441036	0.00137833	1.3566e-05
580437	NM_003033.2	ST3GAL1	8	hsa-miR-9*	1	-0.379123	0.00755721	0.000228731
580437	NM_003033.2	ST3GAL1	8	hsa-miR-9*	5	-0.379123	0.00755721	0.000228731
580437	NM_003033.2	ST3GAL1	8	hsa-miR-9*	15	-0.379123	0.00755721	0.000228731
580465	NM_173544.2	FAM129C	19	hsa-miR-10a	17	-0.481467	0.000187276	1.55507e-06
580465	NM_173544.2	FAM129C	19	hsa-miR-130b	22	-0.413433	0.00770933	5.11951e-05
580537	NM_032415.2	CARD11	7	hsa-miR-10a	17	-0.36807	0.00765857	0.000358117
580537	NM_032415.2	CARD11	7	hsa-miR-181a	1	-0.531527	1.84e-05	7.03134e-08
580537	NM_032415.2	CARD11	7	hsa-miR-181a	9	-0.531527	1.84e-05	7.03134e-08
580537	NM_032415.2	CARD11	7	hsa-miR-181b	1	-0.4695	0.000318897	3.0393e-06
580537	NM_032415.2	CARD11	7	hsa-miR-181b	9	-0.4695	0.000318897	3.0393e-06
580537	NM_032415.2	CARD11	7	hsa-miR-181c	19	-0.483545	0.000199067	1.38065e-06
580537	NM_032415.2	CARD11	7	hsa-miR-18b	X	-0.408585	0.00198515	6.38912e-05
580537	NM_032415.2	CARD11	7	hsa-miR-192	11	-0.400868	0.00857587	9.02767e-05
580537	NM_032415.2	CARD11	7	hsa-miR-194	1	-0.418697	0.00579764	4.00937e-05
580537	NM_032415.2	CARD11	7	hsa-miR-194	11	-0.418697	0.00579764	4.00937e-05
580537	NM_032415.2	CARD11	7	hsa-miR-20b	X	-0.409807	0.0019564	6.04406e-05
580537	NM_032415.2	CARD11	7	hsa-miR-213	1	-0.551104	1.44e-05	1.81718e-08
580537	NM_032415.2	CARD11	7	hsa-miR-363	X	-0.413111	0.00151919	5.19595e-05
580603	NM_001098526.1	AMICA1	11	hsa-miR-181a	1	0.386452	0.00519745	0.000168408
580603	NM_001098526.1	AMICA1	11	hsa-miR-181a	9	0.386452	0.00519745	0.000168408
580603	NM_001098526.1	AMICA1	11	hsa-miR-181c	19	0.421776	0.00198224	3.46867e-05
580603	NM_001098526.1	AMICA1	11	hsa-miR-18b	X	0.526509	1.35e-05	9.81186e-08
580603	NM_001098526.1	AMICA1	11	hsa-miR-192	11	0.430205	0.00448118	2.31618e-05
580603	NM_001098526.1	AMICA1	11	hsa-miR-194	1	0.445433	0.00241759	1.08606e-05
580603	NM_001098526.1	AMICA1	11	hsa-miR-194	11	0.445433	0.00241759	1.08606e-05
580603	NM_001098526.1	AMICA1	11	hsa-miR-20b	X	0.566239	1.65e-06	6.00545e-09
580603	NM_001098526.1	AMICA1	11	hsa-miR-363	X	0.580797	7.22e-07	1.96174e-09
580612	NM_139164.1	STARD4	5	hsa-miR-18b	X	-0.386574	0.00391389	0.000167542
580612	NM_139164.1	STARD4	5	hsa-miR-20b	X	-0.393747	0.00319229	0.000123279
580612	NM_139164.1	STARD4	5	hsa-miR-363	X	-0.37881	0.004381	0.000231704
580681	NM_024828.2	C9orf82	9	hsa-miR-10a	17	-0.372739	0.00671032	0.000296909
580681	NM_024828.2	C9orf82	9	hsa-miR-192	11	-0.406039	0.00769295	7.16771e-05
580681	NM_024828.2	C9orf82	9	hsa-miR-215	1	-0.487274	0.00203441	1.11305e-06
580681	NM_024828.2	C9orf82	9	hsa-miR-363	X	-0.354998	0.00842523	0.000596341
580681	NM_024828.2	C9orf82	9	hsa-miR-486	8	-0.418802	0.00530023	3.9897e-05
610026	NM_002801.2	PSMB10	16	hsa-miR-18b	X	0.35216	0.0098958	0.000664274
610026	NM_002801.2	PSMB10	16	hsa-miR-20b	X	0.408031	0.00205465	6.55152e-05
610026	NM_002801.2	PSMB10	16	hsa-miR-363	X	0.370621	0.00553942	0.000323371
610082	NM_001493.1	GDI1	X	hsa-miR-331	12	0.453255	0.0010598	7.25561e-06
610195	NM_012388.2	PLDN	15	hsa-miR-221	X	-0.414122	0.00289569	4.95946e-05
610291	NM_173701.1	WARS	14	hsa-miR-138	3	-0.480345	0.00279794	1.65769e-06
610291	NM_173701.1	WARS	14	hsa-miR-138	16	-0.480345	0.00279794	1.65769e-06
610341	NM_002033.2	FUT4	11	hsa-miR-10a	17	0.470585	0.000283726	2.86311e-06
610341	NM_002033.2	FUT4	11	hsa-miR-130b	22	0.405966	0.00926144	7.19128e-05
610341	NM_002033.2	FUT4	11	hsa-miR-18b	X	0.483508	0.000111454	1.38359e-06
610341	NM_002033.2	FUT4	11	hsa-miR-192	11	0.518397	0.000188354	1.66265e-07
610341	NM_002033.2	FUT4	11	hsa-miR-194	1	0.465905	0.00135748	3.69893e-06
610341	NM_002033.2	FUT4	11	hsa-miR-194	11	0.465905	0.00135748	3.69893e-06
610341	NM_002033.2	FUT4	11	hsa-miR-20b	X	0.498839	5.14e-05	5.61296e-07
610341	NM_002033.2	FUT4	11	hsa-miR-215	1	0.443587	0.00664481	1.19281e-05
610341	NM_002033.2	FUT4	11	hsa-miR-363	X	0.519867	1.78e-05	1.51264e-07
610400	NM_031157.2	HNRPA1	12	hsa-miR-331	12	-0.436479	0.00170733	1.7028e-05
610563	NM_002129.2	HMGB2	4	hsa-miR-551a	1	-0.427338	0.00940979	2.66043e-05
610762	NM_004697.3	PRPF4	9	hsa-miR-34b	11	-0.465	0.00541292	3.88507e-06
620209	NM_001013653.2	LRRC26	9	hsa-miR-126*	9	0.467121	0.00657197	3.46203e-06
620209	NM_001013653.2	LRRC26	9	hsa-miR-18b	X	0.382189	0.00445876	0.00020141
620209	NM_001013653.2	LRRC26	9	hsa-miR-194	1	0.437599	0.00324745	1.61077e-05
620209	NM_001013653.2	LRRC26	9	hsa-miR-194	11	0.437599	0.00324745	1.61077e-05
620209	NM_001013653.2	LRRC26	9	hsa-miR-20b	X	0.417143	0.00152632	4.31119e-05
620209	NM_001013653.2	LRRC26	9	hsa-miR-363	X	0.424341	0.00103107	3.07102e-05
620209	NM_001013653.2	LRRC26	9	hsa-miR-486	8	0.396586	0.00839482	0.000108971
620215	NM_001039548.1	FLJ33790	11	hsa-miR-33b	17	0.41168	0.00757173	5.54867e-05
620246	NM_002528.4	NTHL1	16	hsa-miR-30b	8	0.415317	0.00822959	4.69288e-05
620278	NM_006951.3	TAF5	10	hsa-miR-10a	17	-0.378475	0.00579079	0.000234926
620408	NM_006420.2	ARFGEF2	20	hsa-miR-181b	1	-0.404052	0.00300798	7.83566e-05
620408	NM_006420.2	ARFGEF2	20	hsa-miR-181b	9	-0.404052	0.00300798	7.83566e-05
620408	NM_006420.2	ARFGEF2	20	hsa-miR-181c	19	-0.424146	0.00182703	3.09969e-05
620408	NM_006420.2	ARFGEF2	20	hsa-miR-213	1	-0.422527	0.00236052	3.34753e-05
620470	NM_005113.2	GOLGA5	14	hsa-miR-20b	X	-0.411766	0.00185524	5.52686e-05
620470	NM_005113.2	GOLGA5	14	hsa-miR-213	1	-0.393617	0.00533461	0.000123974
620494	NM_001034.1	RRM2	5	hsa-miR-18b	X	0.359032	0.00823811	0.00051068
620494	NM_001034.1	RRM2	5	hsa-miR-331	12	-0.468212	0.000743827	3.26172e-06
620494	NM_001034.1	RRM2	5	hsa-miR-486	8	0.462666	0.00168308	4.40666e-06
620504	NM_000283.2	PDE6B	4	hsa-miR-551b	3	-0.44093	0.00552217	1.36385e-05
620520	NM_002735.1	PRKAR1B	7	hsa-miR-221	X	-0.382218	0.00719168	0.000201167
620520	NM_002735.1	PRKAR1B	7	hsa-miR-222	X	-0.3814	0.00816735	0.000208137
620601	NM_003094.2	SNRPE	1	hsa-miR-486	8	-0.389768	0.00999874	0.000146276
620735	NM_006479.3	RAD51AP1	12	hsa-miR-10a	17	0.393077	0.00390423	0.0001269
620735	NM_006479.3	RAD51AP1	12	hsa-miR-130a	11	0.415105	0.00770746	4.73917e-05
620735	NM_006479.3	RAD51AP1	12	hsa-miR-130b	22	0.402468	0.00989232	8.40909e-05
620735	NM_006479.3	RAD51AP1	12	hsa-miR-18b	X	0.46102	0.000282951	4.81339e-06
620735	NM_006479.3	RAD51AP1	12	hsa-miR-20b	X	0.389854	0.00364889	0.000145739
620735	NM_006479.3	RAD51AP1	12	hsa-miR-331	12	-0.448225	0.00127695	9.41499e-06
620735	NM_006479.3	RAD51AP1	12	hsa-miR-33b	17	0.45348	0.00291689	7.17085e-06
620735	NM_006479.3	RAD51AP1	12	hsa-miR-363	X	0.39892	0.00240415	9.83776e-05
620735	NM_006479.3	RAD51AP1	12	hsa-miR-486	8	0.410824	0.00669524	5.77019e-05
620735	NM_006479.3	RAD51AP1	12	hsa-miR-551a	1	-0.466348	0.00446992	3.61091e-06
620735	NM_006479.3	RAD51AP1	12	hsa-miR-98	X	-0.443818	0.00226881	1.17894e-05
630333	NM_012320.3	LYPLA3	16	hsa-miR-221	X	0.37941	0.00772973	0.000226036
630450	NM_001547.4	IFIT2	10	hsa-miR-181a	1	0.402843	0.00318273	8.26992e-05
630450	NM_001547.4	IFIT2	10	hsa-miR-181a	9	0.402843	0.00318273	8.26992e-05
630450	NM_001547.4	IFIT2	10	hsa-miR-181b	1	0.459834	0.000475621	5.12808e-06
630450	NM_001547.4	IFIT2	10	hsa-miR-181b	9	0.459834	0.000475621	5.12808e-06
630450	NM_001547.4	IFIT2	10	hsa-miR-181c	19	0.444982	0.000839905	1.11128e-05
630450	NM_001547.4	IFIT2	10	hsa-miR-213	1	0.439773	0.00137767	1.44528e-05
630450	NM_001547.4	IFIT2	10	hsa-miR-221	X	0.435724	0.00150736	1.7676e-05
630450	NM_001547.4	IFIT2	10	hsa-miR-222	X	0.441589	0.00136787	1.3194e-05
630450	NM_001547.4	IFIT2	10	hsa-miR-339	7	0.421837	0.00346659	3.45868e-05
630450	NM_001547.4	IFIT2	10	hsa-miR-363	X	0.383948	0.0037553	0.000187129
630500	NM_003756.2	EIF3H	8	hsa-miR-10a	17	-0.372196	0.00678651	0.000303496
630524	NM_015345.2	DAAM2	6	hsa-miR-10a	17	0.517965	4.18e-05	1.70936e-07
630524	NM_015345.2	DAAM2	6	hsa-miR-18b	X	0.58543	5.14e-07	1.35816e-09
630524	NM_015345.2	DAAM2	6	hsa-miR-20b	X	0.592127	3.25e-07	7.90022e-10
630524	NM_015345.2	DAAM2	6	hsa-miR-363	X	0.559543	2.56e-06	9.86845e-09
630543	NM_001006610.1	SIAH1	16	hsa-miR-33b	17	0.437521	0.00387758	1.61703e-05
630746	NM_018009.3	TAPBPL	12	hsa-miR-10a	17	0.363576	0.0085992	0.000427783
630746	NM_018009.3	TAPBPL	12	hsa-miR-18b	X	0.437708	0.0007075	1.60207e-05
630746	NM_018009.3	TAPBPL	12	hsa-miR-20b	X	0.415462	0.00162493	4.66145e-05
630746	NM_018009.3	TAPBPL	12	hsa-miR-363	X	0.409827	0.00169063	6.03856e-05
650110	NM_002067.2	GNA11	19	hsa-miR-331	12	-0.475628	0.000627572	2.16332e-06
650110	NM_002067.2	GNA11	19	hsa-miR-9*	1	-0.399068	0.00466841	9.77393e-05
650110	NM_002067.2	GNA11	19	hsa-miR-9*	5	-0.399068	0.00466841	9.77393e-05
650110	NM_002067.2	GNA11	19	hsa-miR-9*	15	-0.399068	0.00466841	9.77393e-05
650113	NM_025245.1	PBX4	19	hsa-miR-221	X	-0.379475	0.00772973	0.000225429
650113	NM_025245.1	PBX4	19	hsa-miR-9	1	0.49273	0.00040509	8.08361e-07
650113	NM_025245.1	PBX4	19	hsa-miR-9	5	0.49273	0.00040509	8.08361e-07
650113	NM_025245.1	PBX4	19	hsa-miR-9	15	0.49273	0.00040509	8.08361e-07
650113	NM_025245.1	PBX4	19	hsa-miR-9*	1	0.462715	0.000820891	4.39506e-06
650113	NM_025245.1	PBX4	19	hsa-miR-9*	5	0.462715	0.000820891	4.39506e-06
650113	NM_025245.1	PBX4	19	hsa-miR-9*	15	0.462715	0.000820891	4.39506e-06
650152	NM_138445.2	GPR146	7	hsa-miR-181b	1	0.42691	0.00147387	2.71575e-05
650152	NM_138445.2	GPR146	7	hsa-miR-181b	9	0.42691	0.00147387	2.71575e-05
650152	NM_138445.2	GPR146	7	hsa-miR-18b	X	0.378672	0.00483347	0.000233027
650152	NM_138445.2	GPR146	7	hsa-miR-221	X	0.409759	0.00332627	6.05728e-05
650152	NM_138445.2	GPR146	7	hsa-miR-222	X	0.43422	0.00174239	1.9036e-05
650152	NM_138445.2	GPR146	7	hsa-miR-339	7	0.492801	0.000474138	8.04974e-07
650152	NM_138445.2	GPR146	7	hsa-miR-363	X	0.370867	0.00550061	0.00032019
650152	NM_138445.2	GPR146	7	hsa-miR-9	1	-0.519317	0.000162563	1.5672e-07
650152	NM_138445.2	GPR146	7	hsa-miR-9	5	-0.519317	0.000162563	1.5672e-07
650152	NM_138445.2	GPR146	7	hsa-miR-9	15	-0.519317	0.000162563	1.5672e-07
650152	NM_138445.2	GPR146	7	hsa-miR-9*	1	-0.545434	6.43e-05	2.7131e-08
650152	NM_138445.2	GPR146	7	hsa-miR-9*	5	-0.545434	6.43e-05	2.7131e-08
650152	NM_138445.2	GPR146	7	hsa-miR-9*	15	-0.545434	6.43e-05	2.7131e-08
650164	NM_000896.1	CYP4F3	19	hsa-miR-130a	11	-0.416529	0.00749897	4.43618e-05
650164	NM_000896.1	CYP4F3	19	hsa-miR-181a	1	-0.398495	0.0037097	0.000100232
650164	NM_000896.1	CYP4F3	19	hsa-miR-181a	9	-0.398495	0.0037097	0.000100232
650164	NM_000896.1	CYP4F3	19	hsa-miR-181b	1	-0.398298	0.00349714	0.000101103
650164	NM_000896.1	CYP4F3	19	hsa-miR-181b	9	-0.398298	0.00349714	0.000101103
650164	NM_000896.1	CYP4F3	19	hsa-miR-181c	19	-0.404415	0.00330647	7.70947e-05
650164	NM_000896.1	CYP4F3	19	hsa-miR-18b	X	-0.413541	0.00169286	5.09411e-05
650164	NM_000896.1	CYP4F3	19	hsa-miR-20b	X	-0.415347	0.00162737	4.68636e-05
650164	NM_000896.1	CYP4F3	19	hsa-miR-363	X	-0.425911	0.000982689	2.84908e-05
650164	NM_000896.1	CYP4F3	19	hsa-miR-9*	1	0.376958	0.00787437	0.000250039
650164	NM_000896.1	CYP4F3	19	hsa-miR-9*	5	0.376958	0.00787437	0.000250039
650164	NM_000896.1	CYP4F3	19	hsa-miR-9*	15	0.376958	0.00787437	0.000250039
650167	NM_022121.2	PERP	6	hsa-miR-18b	X	-0.498967	5.57e-05	5.56981e-07
650167	NM_022121.2	PERP	6	hsa-miR-20b	X	-0.524192	1.55e-05	1.14231e-07
650167	NM_022121.2	PERP	6	hsa-miR-363	X	-0.514681	2.3e-05	2.10743e-07
650451	NM_199229.1	RPE	2	hsa-miR-331	12	-0.419349	0.00277596	3.8887e-05
650451	NM_199229.1	RPE	2	hsa-miR-486	8	0.411878	0.00646199	5.49857e-05
650543	NM_004117.2	FKBP5	6	hsa-miR-625	14	-0.429655	0.00607306	2.37881e-05
650546	NM_002448.3	MSX1	4	hsa-miR-10a	17	0.57035	2.76e-06	4.40271e-09
650546	NM_002448.3	MSX1	4	hsa-miR-181a	1	0.419544	0.00187996	3.85328e-05
650546	NM_002448.3	MSX1	4	hsa-miR-181a	9	0.419544	0.00187996	3.85328e-05
650546	NM_002448.3	MSX1	4	hsa-miR-181c	19	0.376288	0.00716827	0.000256995
650546	NM_002448.3	MSX1	4	hsa-miR-18b	X	0.47717	0.000147519	1.98388e-06
650546	NM_002448.3	MSX1	4	hsa-miR-20b	X	0.499605	4.96e-05	5.35934e-07
650546	NM_002448.3	MSX1	4	hsa-miR-213	1	0.380916	0.0076178	0.000212366
650546	NM_002448.3	MSX1	4	hsa-miR-363	X	0.466683	0.000208726	3.54567e-06
650546	NM_002448.3	MSX1	4	hsa-miR-486	8	0.440589	0.00276467	1.38739e-05
650608	NM_006571.2	DCTN6	8	hsa-miR-10a	17	0.403465	0.0029354	8.04379e-05
650608	NM_006571.2	DCTN6	8	hsa-miR-18b	X	0.442944	0.000585838	1.23225e-05
650608	NM_006571.2	DCTN6	8	hsa-miR-20b	X	0.367085	0.00718165	0.000372427
650608	NM_006571.2	DCTN6	8	hsa-miR-363	X	0.393833	0.00280237	0.000122821
650626	NM_175624.2	RAB3IP	12	hsa-miR-9	1	0.381357	0.0081771	0.00020851
650626	NM_175624.2	RAB3IP	12	hsa-miR-9	5	0.381357	0.0081771	0.00020851
650626	NM_175624.2	RAB3IP	12	hsa-miR-9	15	0.381357	0.0081771	0.00020851
650647	XM_376463.3	MGC39372	6	hsa-miR-363	X	0.400385	0.00233336	9.22254e-05
650661	XM_944534.1	LOC442597	7	hsa-miR-20b	X	-0.359883	0.00873813	0.000494115
650717	NM_001031714.3	C14orf173	14	hsa-miR-15a	13	0.514384	0.00256036	2.14747e-07
670041	CR596519		7	hsa-miR-10a	17	-0.417196	0.00179478	4.30056e-05
670041	CR596519		7	hsa-miR-18b	X	-0.415911	0.00157349	4.56539e-05
670041	CR596519		7	hsa-miR-20b	X	-0.397361	0.00292865	0.000105341
670041	CR596519		7	hsa-miR-221	X	-0.470492	0.000399248	2.87783e-06
670041	CR596519		7	hsa-miR-222	X	-0.409764	0.00372893	6.0559e-05
670041	CR596519		7	hsa-miR-30b	8	-0.460077	0.0030849	5.06207e-06
670041	CR596519		7	hsa-miR-363	X	-0.409267	0.00170392	6.19435e-05
670091	NM_016625.2	RSRC1	3	hsa-miR-10a	17	0.420784	0.00162177	3.63495e-05
670091	NM_016625.2	RSRC1	3	hsa-miR-18b	X	0.39283	0.00325319	0.00012826
670091	NM_016625.2	RSRC1	3	hsa-miR-486	8	0.434827	0.00355413	1.84757e-05
670092	NM_001078172.1	FAM127B	X	hsa-miR-18b	X	0.371636	0.0058458	0.00031043
670092	NM_001078172.1	FAM127B	X	hsa-miR-221	X	0.391742	0.005432	0.000134412
670092	NM_001078172.1	FAM127B	X	hsa-miR-222	X	0.375243	0.00952777	0.000268201
670132	NM_014746.2	RNF144	2	hsa-miR-130a	11	0.405894	0.0093642	7.2146e-05
670139	NM_015163.4	TRIM9	14	hsa-miR-10a	17	0.395104	0.00369762	0.000116236
670139	NM_015163.4	TRIM9	14	hsa-miR-181a	1	0.380498	0.00611724	0.000216081
670139	NM_015163.4	TRIM9	14	hsa-miR-181a	9	0.380498	0.00611724	0.000216081
670139	NM_015163.4	TRIM9	14	hsa-miR-18b	X	0.405953	0.00214402	7.19549e-05
670139	NM_015163.4	TRIM9	14	hsa-miR-20b	X	0.43601	0.000780715	1.74278e-05
670139	NM_015163.4	TRIM9	14	hsa-miR-363	X	0.459383	0.000274448	5.25275e-06
670196	NM_175709.2	CBX7	22	hsa-miR-181b	1	-0.416399	0.00200699	4.46308e-05
670196	NM_175709.2	CBX7	22	hsa-miR-181b	9	-0.416399	0.00200699	4.46308e-05
670196	NM_175709.2	CBX7	22	hsa-miR-221	X	-0.396836	0.00479373	0.000107787
670196	NM_175709.2	CBX7	22	hsa-miR-222	X	-0.427001	0.00225177	2.7039e-05
670196	NM_175709.2	CBX7	22	hsa-miR-34b	11	0.430812	0.00924299	2.24885e-05
670324	NM_000170.2	GLDC	9	hsa-miR-181a	1	-0.368697	0.00837227	0.000349272
670324	NM_000170.2	GLDC	9	hsa-miR-181a	9	-0.368697	0.00837227	0.000349272
670324	NM_000170.2	GLDC	9	hsa-miR-213	1	-0.395971	0.00505008	0.000111933
670382	NM_207406.2	CCDC4	4	hsa-miR-181a	1	0.363083	0.00970777	0.000436139
670382	NM_207406.2	CCDC4	4	hsa-miR-181a	9	0.363083	0.00970777	0.000436139
670382	NM_207406.2	CCDC4	4	hsa-miR-181c	19	0.42548	0.00175422	2.90846e-05
670382	NM_207406.2	CCDC4	4	hsa-miR-18b	X	0.435404	0.000777282	1.79575e-05
670382	NM_207406.2	CCDC4	4	hsa-miR-20b	X	0.437646	0.000746916	1.60702e-05
670382	NM_207406.2	CCDC4	4	hsa-miR-363	X	0.47819	0.000126246	1.873e-06
670398	NM_006327.2	TIMM23	10	hsa-miR-9*	1	0.389034	0.00603193	0.000150929
670398	NM_006327.2	TIMM23	10	hsa-miR-9*	5	0.389034	0.00603193	0.000150929
670398	NM_006327.2	TIMM23	10	hsa-miR-9*	15	0.389034	0.00603193	0.000150929
670398	NM_006327.2	TIMM23	10	hsa-miR-98	X	0.387652	0.0068962	0.000160064
670441	AJ227862		5	hsa-miR-339	7	0.393683	0.00699984	0.000123621
670441	AJ227862		5	hsa-miR-98	X	-0.409006	0.0047161	6.26822e-05
670494	NM_005486.1	TOM1L1	17	hsa-miR-10a	17	0.465959	0.000320527	3.6881e-06
670593	NM_014622.4	LOH11CR2A	11	hsa-miR-221	X	0.487696	0.000224334	1.08607e-06
670593	NM_014622.4	LOH11CR2A	11	hsa-miR-222	X	0.485181	0.000265959	1.25652e-06
670735	NM_133486.1	MBNL3	X	hsa-miR-28	3	0.474548	0.00686777	2.298e-06
670735	NM_133486.1	MBNL3	X	hsa-miR-625	14	-0.406928	0.00952305	6.88634e-05
670762	NM_000880.2	IL7	8	hsa-miR-181a	1	0.482722	0.000186244	1.44739e-06
670762	NM_000880.2	IL7	8	hsa-miR-181a	9	0.482722	0.000186244	1.44739e-06
670762	NM_000880.2	IL7	8	hsa-miR-181b	1	0.454362	0.000543374	6.84749e-06
670762	NM_000880.2	IL7	8	hsa-miR-181b	9	0.454362	0.000543374	6.84749e-06
670762	NM_000880.2	IL7	8	hsa-miR-181c	19	0.424632	0.00179651	3.0287e-05
670762	NM_000880.2	IL7	8	hsa-miR-18b	X	0.415862	0.00157349	4.57578e-05
670762	NM_000880.2	IL7	8	hsa-miR-192	11	0.426846	0.0047815	2.72412e-05
670762	NM_000880.2	IL7	8	hsa-miR-20b	X	0.47719	0.000151343	1.98164e-06
670762	NM_000880.2	IL7	8	hsa-miR-213	1	0.528368	4.25e-05	8.67787e-08
670762	NM_000880.2	IL7	8	hsa-miR-215	1	0.430104	0.00972054	2.32756e-05
670762	NM_000880.2	IL7	8	hsa-miR-363	X	0.468082	0.00019573	3.285e-06
730017	NM_003594.3	TTF2	1	hsa-miR-10a	17	-0.390476	0.00424219	0.000141914
730017	NM_003594.3	TTF2	1	hsa-miR-18b	X	-0.487377	9.45e-05	1.10641e-06
730017	NM_003594.3	TTF2	1	hsa-miR-20b	X	-0.48683	9.76e-05	1.14212e-06
730017	NM_003594.3	TTF2	1	hsa-miR-221	X	-0.434503	0.00158627	1.87728e-05
730017	NM_003594.3	TTF2	1	hsa-miR-222	X	-0.44488	0.00123363	1.11706e-05
730017	NM_003594.3	TTF2	1	hsa-miR-363	X	-0.507898	3.2e-05	3.22511e-07
730180	NM_005085.2	NUP214	9	hsa-miR-181a	1	0.376006	0.00696788	0.000259976
730180	NM_005085.2	NUP214	9	hsa-miR-181a	9	0.376006	0.00696788	0.000259976
730180	NM_005085.2	NUP214	9	hsa-miR-181b	1	0.374682	0.00662738	0.000274401
730180	NM_005085.2	NUP214	9	hsa-miR-181b	9	0.374682	0.00662738	0.000274401
730180	NM_005085.2	NUP214	9	hsa-miR-181c	19	0.397978	0.00397648	0.000102532
730192	NM_000605.2	IFNA2	9	hsa-miR-10a	17	0.494835	0.000112518	7.13455e-07
730192	NM_000605.2	IFNA2	9	hsa-miR-181a	1	0.42198	0.00175584	3.43536e-05
730192	NM_000605.2	IFNA2	9	hsa-miR-181a	9	0.42198	0.00175584	3.43536e-05
730192	NM_000605.2	IFNA2	9	hsa-miR-181b	1	0.367076	0.0081652	0.00037256
730192	NM_000605.2	IFNA2	9	hsa-miR-181b	9	0.367076	0.0081652	0.00037256
730192	NM_000605.2	IFNA2	9	hsa-miR-181c	19	0.402588	0.0034686	8.36432e-05
730192	NM_000605.2	IFNA2	9	hsa-miR-18b	X	0.449545	0.000452823	8.79631e-06
730192	NM_000605.2	IFNA2	9	hsa-miR-20b	X	0.465131	0.000260021	3.85759e-06
730192	NM_000605.2	IFNA2	9	hsa-miR-213	1	0.406434	0.0037464	7.0414e-05
730192	NM_000605.2	IFNA2	9	hsa-miR-363	X	0.49132	6.99e-05	8.78485e-07
730255	NM_005326.4	HAGH	16	hsa-miR-339	7	-0.422782	0.00345613	3.3073e-05
730343	NM_000944.3	PPP3CA	4	hsa-miR-221	X	0.508629	0.00010231	3.08193e-07
730343	NM_000944.3	PPP3CA	4	hsa-miR-222	X	0.502031	0.00015666	4.62583e-07
730343	NM_000944.3	PPP3CA	4	hsa-miR-339	7	0.397634	0.00667394	0.00010409
730343	NM_000944.3	PPP3CA	4	hsa-miR-9	1	-0.470208	0.000878906	2.92321e-06
730343	NM_000944.3	PPP3CA	4	hsa-miR-9	5	-0.470208	0.000878906	2.92321e-06
730343	NM_000944.3	PPP3CA	4	hsa-miR-9	15	-0.470208	0.000878906	2.92321e-06
730343	NM_000944.3	PPP3CA	4	hsa-miR-9*	1	-0.41568	0.00300306	4.61458e-05
730343	NM_000944.3	PPP3CA	4	hsa-miR-9*	5	-0.41568	0.00300306	4.61458e-05
730343	NM_000944.3	PPP3CA	4	hsa-miR-9*	15	-0.41568	0.00300306	4.61458e-05
730431	XM_035299.8	ZSWIM6	5	hsa-miR-151	8	0.47396	0.00101778	2.37462e-06
730435	NM_022742.3	CCDC136	7	hsa-miR-9	1	0.414448	0.00364184	4.88537e-05
730435	NM_022742.3	CCDC136	7	hsa-miR-9	5	0.414448	0.00364184	4.88537e-05
730435	NM_022742.3	CCDC136	7	hsa-miR-9	15	0.414448	0.00364184	4.88537e-05
730435	NM_022742.3	CCDC136	7	hsa-miR-9*	1	0.418503	0.00283533	4.04594e-05
730435	NM_022742.3	CCDC136	7	hsa-miR-9*	5	0.418503	0.00283533	4.04594e-05
730435	NM_022742.3	CCDC136	7	hsa-miR-9*	15	0.418503	0.00283533	4.04594e-05
730470	NM_016061.1	YPEL5	2	hsa-miR-331	12	0.374479	0.00983846	0.000276677
730592	NM_007370.3	RFC5	12	HS_188	12	0.457286	0.00878628	5.87081e-06
730592	NM_007370.3	RFC5	12	hsa-miR-331	12	-0.386456	0.00697032	0.00016838
730592	NM_007370.3	RFC5	12	hsa-miR-33b	17	0.452657	0.00291689	7.48548e-06
730592	NM_007370.3	RFC5	12	hsa-miR-98	X	-0.408495	0.0047161	6.41525e-05
730632	NM_025113.1	C13orf18	13	hsa-miR-10a	17	-0.469367	0.00029316	3.06159e-06
730632	NM_025113.1	C13orf18	13	hsa-miR-130b	22	-0.516527	0.000611401	1.87397e-07
730632	NM_025113.1	C13orf18	13	hsa-miR-181a	1	-0.395268	0.00403928	0.00011541
730632	NM_025113.1	C13orf18	13	hsa-miR-181a	9	-0.395268	0.00403928	0.00011541
730632	NM_025113.1	C13orf18	13	hsa-miR-181b	1	-0.37357	0.00682867	0.000287083
730632	NM_025113.1	C13orf18	13	hsa-miR-181b	9	-0.37357	0.00682867	0.000287083
730632	NM_025113.1	C13orf18	13	hsa-miR-18b	X	-0.579899	7.04e-07	2.10526e-09
730632	NM_025113.1	C13orf18	13	hsa-miR-20b	X	-0.531403	1.12e-05	7.08994e-08
730632	NM_025113.1	C13orf18	13	hsa-miR-363	X	-0.511117	2.69e-05	2.63844e-07
730746	NM_152463.1	EME1	17	hsa-miR-331	12	-0.408385	0.00380208	6.44731e-05
770088	NM_032340.2	C6orf125	6	hsa-miR-625	14	0.438743	0.00509798	1.5216e-05
770095	NM_023927.1	GRAMD3	5	hsa-miR-551b	3	0.473799	0.0020363	2.39601e-06
770095	NM_023927.1	GRAMD3	5	hsa-miR-9	1	0.402957	0.00491868	8.22804e-05
770095	NM_023927.1	GRAMD3	5	hsa-miR-9	5	0.402957	0.00491868	8.22804e-05
770095	NM_023927.1	GRAMD3	5	hsa-miR-9	15	0.402957	0.00491868	8.22804e-05
770095	NM_023927.1	GRAMD3	5	hsa-miR-9*	1	0.386433	0.00632186	0.000168543
770095	NM_023927.1	GRAMD3	5	hsa-miR-9*	5	0.386433	0.00632186	0.000168543
770095	NM_023927.1	GRAMD3	5	hsa-miR-9*	15	0.386433	0.00632186	0.000168543
770215	NM_024956.3	TMEM62	15	hsa-miR-18b	X	0.36677	0.0067095	0.000377113
770215	NM_024956.3	TMEM62	15	hsa-miR-363	X	0.359458	0.00754031	0.000502325
770333	NM_006004.1	UQCRH	1	hsa-miR-20b	X	-0.355709	0.00952042	0.000580349
770333	NM_006004.1	UQCRH	1	hsa-miR-363	X	-0.366199	0.00623825	0.000385746
770338	NM_001986.2	ETV4	17	hsa-miR-181a	1	0.452684	0.000601059	7.47495e-06
770338	NM_001986.2	ETV4	17	hsa-miR-181a	9	0.452684	0.000601059	7.47495e-06
770338	NM_001986.2	ETV4	17	hsa-miR-181b	1	0.373611	0.00682867	0.000286606
770338	NM_001986.2	ETV4	17	hsa-miR-181b	9	0.373611	0.00682867	0.000286606
770338	NM_001986.2	ETV4	17	hsa-miR-181c	19	0.376478	0.00715793	0.000255005
770338	NM_001986.2	ETV4	17	hsa-miR-18b	X	0.388566	0.00368765	0.000153967
770338	NM_001986.2	ETV4	17	hsa-miR-20b	X	0.4259	0.00114319	2.85058e-05
770338	NM_001986.2	ETV4	17	hsa-miR-213	1	0.466351	0.000571808	3.61033e-06
770338	NM_001986.2	ETV4	17	hsa-miR-363	X	0.383494	0.00381514	0.000190723
770364	NM_022147.2	RTP4	3	hsa-miR-181a	1	0.41649	0.00205416	4.44423e-05
770364	NM_022147.2	RTP4	3	hsa-miR-181a	9	0.41649	0.00205416	4.44423e-05
770364	NM_022147.2	RTP4	3	hsa-miR-181b	1	0.469262	0.000319556	3.07929e-06
770364	NM_022147.2	RTP4	3	hsa-miR-181b	9	0.469262	0.000319556	3.07929e-06
770364	NM_022147.2	RTP4	3	hsa-miR-181c	19	0.403461	0.00336613	8.04522e-05
770364	NM_022147.2	RTP4	3	hsa-miR-18b	X	0.410726	0.00184713	5.79606e-05
770364	NM_022147.2	RTP4	3	hsa-miR-20b	X	0.429365	0.00100759	2.41246e-05
770364	NM_022147.2	RTP4	3	hsa-miR-213	1	0.426766	0.0021328	2.7346e-05
770364	NM_022147.2	RTP4	3	hsa-miR-34b	11	-0.441184	0.00716974	1.34655e-05
770364	NM_022147.2	RTP4	3	hsa-miR-363	X	0.447478	0.000449909	9.78297e-06
770397	NM_018130.2	SHQ1	3	hsa-miR-181a	1	-0.364704	0.00924234	0.000409215
770397	NM_018130.2	SHQ1	3	hsa-miR-181a	9	-0.364704	0.00924234	0.000409215
770397	NM_018130.2	SHQ1	3	hsa-miR-194	1	-0.436741	0.00332594	1.68084e-05
770397	NM_018130.2	SHQ1	3	hsa-miR-194	11	-0.436741	0.00332594	1.68084e-05
770397	NM_018130.2	SHQ1	3	hsa-miR-20b	X	-0.358689	0.00889987	0.000517499
770458	NM_001398.2	ECH1	19	hsa-miR-20b	X	0.36209	0.00828859	0.000453425
770484	NM_003885.2	CDK5R1	17	hsa-miR-10a	17	-0.437363	0.000922095	1.62977e-05
770484	NM_003885.2	CDK5R1	17	hsa-miR-181b	1	-0.443299	0.00083426	1.21033e-05
770484	NM_003885.2	CDK5R1	17	hsa-miR-181b	9	-0.443299	0.00083426	1.21033e-05
770484	NM_003885.2	CDK5R1	17	hsa-miR-18b	X	-0.378047	0.00490618	0.000239102
770484	NM_003885.2	CDK5R1	17	hsa-miR-213	1	-0.372273	0.00973704	0.000302554
770484	NM_003885.2	CDK5R1	17	hsa-miR-221	X	-0.438743	0.001347	1.5216e-05
770484	NM_003885.2	CDK5R1	17	hsa-miR-222	X	-0.440073	0.00141819	1.42374e-05
770484	NM_003885.2	CDK5R1	17	hsa-miR-339	7	-0.45389	0.00158973	7.01879e-06
770484	NM_003885.2	CDK5R1	17	hsa-miR-363	X	-0.389898	0.0031715	0.000145466
770577	XM_941684.2	LOC220433	13	hsa-miR-486	8	-0.420008	0.00525194	3.77019e-05
770603	NM_030797.2	FAM49A	2	hsa-miR-339	7	-0.474617	0.000886889	2.28917e-06
770603	NM_030797.2	FAM49A	2	hsa-miR-9	1	0.378699	0.00850042	0.000232767
770603	NM_030797.2	FAM49A	2	hsa-miR-9	5	0.378699	0.00850042	0.000232767
770603	NM_030797.2	FAM49A	2	hsa-miR-9	15	0.378699	0.00850042	0.000232767
770639	NM_000997.3	RPL37	5	hsa-miR-10a	17	-0.419731	0.00167705	3.81959e-05
780086	NM_006117.2	PECI	6	hsa-miR-486	8	-0.416102	0.00582119	4.52509e-05
780255	NM_005527.3	HSPA1L	6	hsa-miR-9	1	0.380906	0.00824881	0.000212454
780255	NM_005527.3	HSPA1L	6	hsa-miR-9	5	0.380906	0.00824881	0.000212454
780255	NM_005527.3	HSPA1L	6	hsa-miR-9	15	0.380906	0.00824881	0.000212454
780255	NM_005527.3	HSPA1L	6	hsa-miR-9*	1	0.417381	0.00293388	4.26363e-05
780255	NM_005527.3	HSPA1L	6	hsa-miR-9*	5	0.417381	0.00293388	4.26363e-05
780255	NM_005527.3	HSPA1L	6	hsa-miR-9*	15	0.417381	0.00293388	4.26363e-05
780358	NM_152748.2	KIAA1324L	7	hsa-miR-181c	19	-0.398933	0.00387787	9.83214e-05
780392	NM_002648.2	PIM1	6	hsa-miR-9	1	-0.460454	0.00109148	4.96123e-06
780392	NM_002648.2	PIM1	6	hsa-miR-9	5	-0.460454	0.00109148	4.96123e-06
780392	NM_002648.2	PIM1	6	hsa-miR-9	15	-0.460454	0.00109148	4.96123e-06
780392	NM_002648.2	PIM1	6	hsa-miR-9*	1	-0.475276	0.000597459	2.20637e-06
780392	NM_002648.2	PIM1	6	hsa-miR-9*	5	-0.475276	0.000597459	2.20637e-06
780392	NM_002648.2	PIM1	6	hsa-miR-9*	15	-0.475276	0.000597459	2.20637e-06
780408	NM_002908.2	REL	2	hsa-miR-192	11	-0.420343	0.0055566	3.71124e-05
780408	NM_002908.2	REL	2	hsa-miR-194	1	-0.407165	0.00750502	6.81308e-05
780408	NM_002908.2	REL	2	hsa-miR-194	11	-0.407165	0.00750502	6.81308e-05
780408	NM_002908.2	REL	2	hsa-miR-20b	X	-0.471823	0.000192416	2.67385e-06
780408	NM_002908.2	REL	2	hsa-miR-363	X	-0.398525	0.00242162	0.0001001
780458	NM_006401.2	ANP32B	9	hsa-let-7i	12	0.469222	0.00884915	3.08606e-06
780458	NM_006401.2	ANP32B	9	hsa-miR-98	X	-0.390621	0.00650956	0.000141035
780634	NM_024928.3	OBFC1	10	hsa-miR-30b	8	-0.421722	0.00732597	3.47753e-05
830064	NM_016429.2	COPZ2	17	hsa-miR-152	17	0.539666	0.000436819	4.04825e-08
830091	NM_002744.4	PRKCZ	1	hsa-miR-10a	17	-0.478454	0.000204678	1.84527e-06
830091	NM_002744.4	PRKCZ	1	hsa-miR-192	11	-0.402036	0.00857587	8.57211e-05
830091	NM_002744.4	PRKCZ	1	hsa-miR-194	1	-0.399287	0.00907297	9.68017e-05
830091	NM_002744.4	PRKCZ	1	hsa-miR-194	11	-0.399287	0.00907297	9.68017e-05
830091	NM_002744.4	PRKCZ	1	hsa-miR-20b	X	-0.402119	0.00252139	8.54056e-05
830131	NM_001099743.1	GOLSYN	8	hsa-miR-181a	1	-0.482038	0.000186405	1.50517e-06
830131	NM_001099743.1	GOLSYN	8	hsa-miR-181a	9	-0.482038	0.000186405	1.50517e-06
830131	NM_001099743.1	GOLSYN	8	hsa-miR-181b	1	-0.368961	0.00777083	0.000345609
830131	NM_001099743.1	GOLSYN	8	hsa-miR-181b	9	-0.368961	0.00777083	0.000345609
830131	NM_001099743.1	GOLSYN	8	hsa-miR-181c	19	-0.428023	0.0015976	2.57409e-05
830131	NM_001099743.1	GOLSYN	8	hsa-miR-18b	X	-0.372383	0.00573416	0.000301213
830131	NM_001099743.1	GOLSYN	8	hsa-miR-20b	X	-0.428163	0.00105004	2.55677e-05
830131	NM_001099743.1	GOLSYN	8	hsa-miR-213	1	-0.393576	0.00533461	0.000124194
830131	NM_001099743.1	GOLSYN	8	hsa-miR-363	X	-0.47051	0.000176529	2.87497e-06
830148	NM_139121.1	YY1AP1	1	hsa-miR-30a-5p	6	-0.419535	0.00754	3.8549e-05
830148	NM_139121.1	YY1AP1	1	hsa-miR-30b	8	-0.532958	0.000314047	6.38761e-08
830162	NM_016479.3	SCOTIN	3	hsa-miR-221	X	0.390489	0.0056581	0.000141835
830162	NM_016479.3	SCOTIN	3	hsa-miR-222	X	0.395483	0.00554765	0.000114336
830162	NM_016479.3	SCOTIN	3	hsa-miR-363	X	0.385815	0.00357155	0.000172999
830162	NM_016479.3	SCOTIN	3	hsa-miR-9	1	-0.453366	0.0012758	7.21368e-06
830162	NM_016479.3	SCOTIN	3	hsa-miR-9	5	-0.453366	0.0012758	7.21368e-06
830162	NM_016479.3	SCOTIN	3	hsa-miR-9	15	-0.453366	0.0012758	7.21368e-06
830162	NM_016479.3	SCOTIN	3	hsa-miR-9*	1	-0.481508	0.000463277	1.55143e-06
830162	NM_016479.3	SCOTIN	3	hsa-miR-9*	5	-0.481508	0.000463277	1.55143e-06
830162	NM_016479.3	SCOTIN	3	hsa-miR-9*	15	-0.481508	0.000463277	1.55143e-06
830164	NM_001080394.1	KIAA0146	8	hsa-miR-339	7	0.474058	0.000886889	2.36168e-06
830164	NM_001080394.1	KIAA0146	8	hsa-miR-9*	1	-0.381815	0.00709197	0.000204573
830164	NM_001080394.1	KIAA0146	8	hsa-miR-9*	5	-0.381815	0.00709197	0.000204573
830164	NM_001080394.1	KIAA0146	8	hsa-miR-9*	15	-0.381815	0.00709197	0.000204573
830164	NM_001080394.1	KIAA0146	8	hsa-miR-98	X	-0.416785	0.00395449	4.38366e-05
830324	NM_006278.1	ST3GAL4	11	hsa-miR-221	X	0.500134	0.000146203	5.19057e-07
830324	NM_006278.1	ST3GAL4	11	hsa-miR-222	X	0.530043	5.52e-05	7.76389e-08
830324	NM_006278.1	ST3GAL4	11	hsa-miR-331	12	-0.436413	0.00170733	1.70838e-05
830324	NM_006278.1	ST3GAL4	11	hsa-miR-339	7	0.492579	0.000474138	8.15609e-07
830324	NM_006278.1	ST3GAL4	11	hsa-miR-33b	17	0.424094	0.00593079	3.10737e-05
830324	NM_006278.1	ST3GAL4	11	hsa-miR-9	1	-0.536142	9.29e-05	5.15062e-08
830324	NM_006278.1	ST3GAL4	11	hsa-miR-9	5	-0.536142	9.29e-05	5.15062e-08
830324	NM_006278.1	ST3GAL4	11	hsa-miR-9	15	-0.536142	9.29e-05	5.15062e-08
830324	NM_006278.1	ST3GAL4	11	hsa-miR-9*	1	-0.539088	6.43e-05	4.21215e-08
830324	NM_006278.1	ST3GAL4	11	hsa-miR-9*	5	-0.539088	6.43e-05	4.21215e-08
830324	NM_006278.1	ST3GAL4	11	hsa-miR-9*	15	-0.539088	6.43e-05	4.21215e-08
830347	NM_001467.4	SLC37A4	11	hsa-miR-20b	X	0.377951	0.00521737	0.000240049
830382	NM_032510.3	PARD6G	18	hsa-miR-10a	17	0.40605	0.00274516	7.16416e-05
830382	NM_032510.3	PARD6G	18	hsa-miR-181a	1	0.43539	0.0011623	1.79699e-05
830382	NM_032510.3	PARD6G	18	hsa-miR-181a	9	0.43539	0.0011623	1.79699e-05
830382	NM_032510.3	PARD6G	18	hsa-miR-181b	1	0.395697	0.00371431	0.000113276
830382	NM_032510.3	PARD6G	18	hsa-miR-181b	9	0.395697	0.00371431	0.000113276
830382	NM_032510.3	PARD6G	18	hsa-miR-181c	19	0.397196	0.00405876	0.000106104
830382	NM_032510.3	PARD6G	18	hsa-miR-18b	X	0.462024	0.000275576	4.56129e-06
830382	NM_032510.3	PARD6G	18	hsa-miR-192	11	0.429703	0.00448118	2.37328e-05
830382	NM_032510.3	PARD6G	18	hsa-miR-194	1	0.427571	0.0043922	2.63076e-05
830382	NM_032510.3	PARD6G	18	hsa-miR-194	11	0.427571	0.0043922	2.63076e-05
830382	NM_032510.3	PARD6G	18	hsa-miR-20b	X	0.461336	0.000296856	4.73266e-06
830382	NM_032510.3	PARD6G	18	hsa-miR-363	X	0.488933	7.76e-05	1.01049e-06
830382	NM_032510.3	PARD6G	18	hsa-miR-618	12	0.439651	0.00928602	1.45413e-05
830437	NM_001002800.1	SMC4	3	HS_188	12	0.436312	0.00998482	1.71694e-05
830437	NM_001002800.1	SMC4	3	HS_200	12	0.484004	0.00259077	1.3447e-06
830437	NM_001002800.1	SMC4	3	hsa-miR-331	12	-0.440068	0.00162901	1.4241e-05
830437	NM_001002800.1	SMC4	3	hsa-miR-98	X	-0.471353	0.00125079	2.74427e-06
830576	NM_006638.2	RPP40	6	hsa-miR-181a	1	-0.444683	0.000824659	1.1283e-05
830576	NM_006638.2	RPP40	6	hsa-miR-181a	9	-0.444683	0.000824659	1.1283e-05
830576	NM_006638.2	RPP40	6	hsa-miR-181b	1	-0.391359	0.00418953	0.000136642
830576	NM_006638.2	RPP40	6	hsa-miR-181b	9	-0.391359	0.00418953	0.000136642
830576	NM_006638.2	RPP40	6	hsa-miR-181c	19	-0.39569	0.00428206	0.000113311
830576	NM_006638.2	RPP40	6	hsa-miR-18b	X	-0.39502	0.00306977	0.00011666
830576	NM_006638.2	RPP40	6	hsa-miR-20b	X	-0.360377	0.0086996	0.000484727
830576	NM_006638.2	RPP40	6	hsa-miR-363	X	-0.440786	0.000591713	1.37374e-05
830709	NM_006591.1	POLD3	11	hsa-miR-130a	11	0.41648	0.00749897	4.4463e-05
830725	NM_003107.2	SOX4	6	hsa-miR-181a	1	0.431669	0.00132712	2.15691e-05
830725	NM_003107.2	SOX4	6	hsa-miR-181a	9	0.431669	0.00132712	2.15691e-05
830725	NM_003107.2	SOX4	6	hsa-miR-181b	1	0.448518	0.000700633	9.27424e-06
830725	NM_003107.2	SOX4	6	hsa-miR-181b	9	0.448518	0.000700633	9.27424e-06
830725	NM_003107.2	SOX4	6	hsa-miR-181c	19	0.505145	8.26e-05	3.82307e-07
830725	NM_003107.2	SOX4	6	hsa-miR-221	X	0.55447	1.11e-05	1.42732e-08
830725	NM_003107.2	SOX4	6	hsa-miR-222	X	0.527154	5.97e-05	9.40332e-08
830762	NM_003329.2	TXN	9	hsa-miR-551b	3	0.484418	0.0014355	1.31304e-06
840021	NM_000635.2	RFX2	19	hsa-miR-10a	17	0.39558	0.00364945	0.000113855
840021	NM_000635.2	RFX2	19	hsa-miR-130b	22	0.467853	0.00207102	3.3264e-06
840021	NM_000635.2	RFX2	19	hsa-miR-181a	1	0.394511	0.00409659	0.000119266
840021	NM_000635.2	RFX2	19	hsa-miR-181a	9	0.394511	0.00409659	0.000119266
840021	NM_000635.2	RFX2	19	hsa-miR-181b	1	0.384304	0.00510862	0.000184355
840021	NM_000635.2	RFX2	19	hsa-miR-181b	9	0.384304	0.00510862	0.000184355
840021	NM_000635.2	RFX2	19	hsa-miR-18b	X	0.551928	3.82e-06	1.71329e-08
840021	NM_000635.2	RFX2	19	hsa-miR-20b	X	0.480294	0.000132362	1.66251e-06
840021	NM_000635.2	RFX2	19	hsa-miR-363	X	0.527366	1.2e-05	9.27261e-08
840064	NM_001013258.1	ZNF789	7	hsa-miR-221	X	-0.444324	0.00106807	1.14907e-05
840064	NM_001013258.1	ZNF789	7	hsa-miR-222	X	-0.400397	0.00500815	9.21766e-05
840241	NM_001097635.1	GCNT1	9	hsa-miR-192	11	-0.414466	0.00629995	4.88131e-05
840241	NM_001097635.1	GCNT1	9	hsa-miR-194	1	-0.461468	0.00150914	4.69932e-06
840241	NM_001097635.1	GCNT1	9	hsa-miR-194	11	-0.461468	0.00150914	4.69932e-06
840253	NM_016619.1	PLAC8	4	hsa-miR-181a	1	0.482279	0.000186244	1.48457e-06
840253	NM_016619.1	PLAC8	4	hsa-miR-181a	9	0.482279	0.000186244	1.48457e-06
840253	NM_016619.1	PLAC8	4	hsa-miR-181b	1	0.484117	0.000194344	1.33599e-06
840253	NM_016619.1	PLAC8	4	hsa-miR-181b	9	0.484117	0.000194344	1.33599e-06
840253	NM_016619.1	PLAC8	4	hsa-miR-181c	19	0.496055	0.000119562	6.63385e-07
840253	NM_016619.1	PLAC8	4	hsa-miR-20b	X	0.390242	0.00361877	0.000143342
840253	NM_016619.1	PLAC8	4	hsa-miR-213	1	0.415581	0.00291013	4.63581e-05
840253	NM_016619.1	PLAC8	4	hsa-miR-363	X	0.36965	0.00567642	0.000336214
840309	NM_001039673.1	YIF1B	19	hsa-miR-130b	22	0.428546	0.00558343	2.50993e-05
840356	NM_005115.3	MVP	16	hsa-miR-331	12	0.374151	0.00984691	0.000280391
840475	NM_016195.2	MPHOSPH1	10	hsa-miR-33b	17	0.438877	0.00382027	1.51146e-05
840475	NM_016195.2	MPHOSPH1	10	hsa-miR-98	X	-0.424193	0.00333476	3.09276e-05
840528	NM_004059.4	CCBL1	9	hsa-miR-213	1	-0.380513	0.00768959	0.000215947
840608	NM_006586.3	TNRC5	6	hsa-miR-130b	22	0.42229	0.00676235	3.38532e-05
840612	NM_012485.1	HMMR	5	HS_200	12	0.432681	0.00933511	2.05286e-05
840612	NM_012485.1	HMMR	5	hsa-miR-331	12	-0.42242	0.00259916	3.36454e-05
840612	NM_012485.1	HMMR	5	hsa-miR-98	X	-0.420258	0.00350733	3.72612e-05
840626	CR601260		X	hsa-miR-625	14	-0.415011	0.00799223	4.75984e-05
840730	NM_199337.1	LOC374395	11	hsa-miR-222	X	0.374446	0.00963982	0.000277049
870072	NM_006109.3	PRMT5	14	hsa-miR-34b	11	-0.440352	0.00716974	1.40398e-05
870088	NM_015665.4	AAAS	12	hsa-miR-221	X	0.407117	0.00356545	6.82786e-05
870088	NM_015665.4	AAAS	12	hsa-miR-9	1	-0.379629	0.00839153	0.000223998
870088	NM_015665.4	AAAS	12	hsa-miR-9	5	-0.379629	0.00839153	0.000223998
870088	NM_015665.4	AAAS	12	hsa-miR-9	15	-0.379629	0.00839153	0.000223998
870131	NM_182762.2	7A5	7	hsa-miR-10a	17	0.378475	0.00579079	0.000234926
870131	NM_182762.2	7A5	7	hsa-miR-18b	X	0.487361	9.45e-05	1.10744e-06
870131	NM_182762.2	7A5	7	hsa-miR-20b	X	0.433769	0.00085215	1.94625e-05
870131	NM_182762.2	7A5	7	hsa-miR-363	X	0.409679	0.00169063	6.07937e-05
870148	NM_022763.2	FNDC3B	3	hsa-miR-221	X	0.402129	0.00414039	8.53677e-05
870279	NM_014176.2	UBE2T	1	hsa-miR-10a	17	0.391299	0.00416911	0.000136994
870279	NM_014176.2	UBE2T	1	hsa-miR-130b	22	0.433889	0.00524407	1.93482e-05
870279	NM_014176.2	UBE2T	1	hsa-miR-331	12	-0.44988	0.0012071	8.64549e-06
870279	NM_014176.2	UBE2T	1	hsa-miR-486	8	0.42951	0.00426532	2.39558e-05
870338	NM_001439.2	EXTL2	1	hsa-miR-181a	1	0.432616	0.00127528	2.0594e-05
870338	NM_001439.2	EXTL2	1	hsa-miR-181a	9	0.432616	0.00127528	2.0594e-05
870338	NM_001439.2	EXTL2	1	hsa-miR-181b	1	0.489791	0.000162058	9.61015e-07
870338	NM_001439.2	EXTL2	1	hsa-miR-181b	9	0.489791	0.000162058	9.61015e-07
870338	NM_001439.2	EXTL2	1	hsa-miR-181c	19	0.461913	0.000500053	4.58854e-06
870338	NM_001439.2	EXTL2	1	hsa-miR-213	1	0.435113	0.00160298	1.82171e-05
870358	NM_013258.3	PYCARD	16	hsa-miR-181b	1	0.418481	0.00186925	4.05011e-05
870358	NM_013258.3	PYCARD	16	hsa-miR-181b	9	0.418481	0.00186925	4.05011e-05
870358	NM_013258.3	PYCARD	16	hsa-miR-30b	8	0.408361	0.00893915	6.45433e-05
870446	NM_201994.1	VAMP4	1	hsa-miR-20b	X	-0.368468	0.00692972	0.000352479
870608	NM_145697.2	NUF2	1	hsa-miR-331	12	-0.4233	0.00256012	3.22697e-05
870619	NM_199181.2	C20orf117	20	hsa-miR-129	7	-0.513376	0.00306617	2.28885e-07
870619	NM_199181.2	C20orf117	20	hsa-miR-363	X	0.358281	0.00780197	0.000525719
870619	NM_199181.2	C20orf117	20	hsa-miR-363*	X	-0.503142	0.00535129	4.32266e-07
870619	NM_199181.2	C20orf117	20	hsa-miR-365	16	0.503684	0.00241027	4.18168e-07
870619	NM_199181.2	C20orf117	20	hsa-miR-365	17	0.503684	0.00241027	4.18168e-07
870619	NM_199181.2	C20orf117	20	hsa-miR-486	8	0.478553	0.00098945	1.83497e-06
870681	NM_000943.4	PPIC	5	hsa-miR-10a	17	0.377421	0.00592595	0.000245334
870681	NM_000943.4	PPIC	5	hsa-miR-18b	X	0.36239	0.0074834	0.000448137
870681	NM_000943.4	PPIC	5	hsa-miR-20b	X	0.461962	0.000292099	4.57649e-06
940056	NM_015028.1	TNIK	3	hsa-miR-339	7	-0.405685	0.00538815	7.28269e-05
940193	NM_020897.1	HCN3	1	hsa-miR-18b	X	0.382393	0.00443223	0.000199704
940193	NM_020897.1	HCN3	1	hsa-miR-20b	X	0.373391	0.00602508	0.000289174
940220	NM_005370.4	RAB8A	19	hsa-miR-222	X	0.379316	0.00852465	0.000226915
940278	NM_001014795.1	ILK	11	hsa-miR-181a	1	0.439917	0.00100443	1.43491e-05
940278	NM_001014795.1	ILK	11	hsa-miR-181a	9	0.439917	0.00100443	1.43491e-05
940278	NM_001014795.1	ILK	11	hsa-miR-181b	1	0.526438	2.91e-05	9.85785e-08
940278	NM_001014795.1	ILK	11	hsa-miR-181b	9	0.526438	2.91e-05	9.85785e-08
940278	NM_001014795.1	ILK	11	hsa-miR-181c	19	0.395492	0.00430167	0.000114291
940278	NM_001014795.1	ILK	11	hsa-miR-213	1	0.449156	0.00102661	8.97455e-06
940278	NM_001014795.1	ILK	11	hsa-miR-221	X	0.400104	0.00436156	9.33771e-05
940278	NM_001014795.1	ILK	11	hsa-miR-222	X	0.411262	0.00359139	5.65583e-05
940278	NM_001014795.1	ILK	11	hsa-miR-339	7	0.418477	0.00379824	4.05087e-05
940278	NM_001014795.1	ILK	11	hsa-miR-363	X	0.355342	0.00835233	0.000588554
940373	NM_005713.1	COL4A3BP	5	hsa-miR-10a	17	0.445859	0.000683872	1.06273e-05
940373	NM_005713.1	COL4A3BP	5	hsa-miR-18b	X	0.494878	6.88e-05	7.11631e-07
940373	NM_005713.1	COL4A3BP	5	hsa-miR-20b	X	0.465438	0.000258541	3.79391e-06
940373	NM_005713.1	COL4A3BP	5	hsa-miR-363	X	0.456189	0.00031388	6.22077e-06
940470	NM_015462.3	NOL11	17	hsa-miR-181a	1	-0.362218	0.00992751	0.000451162
940470	NM_015462.3	NOL11	17	hsa-miR-181a	9	-0.362218	0.00992751	0.000451162
940470	NM_015462.3	NOL11	17	hsa-miR-213	1	-0.395313	0.00509783	0.000115185
940504	NM_006116.2	MAP3K7IP1	22	hsa-miR-181b	1	0.40108	0.00328619	8.94335e-05
940504	NM_006116.2	MAP3K7IP1	22	hsa-miR-181b	9	0.40108	0.00328619	8.94335e-05
940504	NM_006116.2	MAP3K7IP1	22	hsa-miR-9	1	-0.394511	0.0059765	0.000119266
940504	NM_006116.2	MAP3K7IP1	22	hsa-miR-9	5	-0.394511	0.0059765	0.000119266
940504	NM_006116.2	MAP3K7IP1	22	hsa-miR-9	15	-0.394511	0.0059765	0.000119266
940504	NM_006116.2	MAP3K7IP1	22	hsa-miR-9*	1	-0.38533	0.00646402	0.000176572
940504	NM_006116.2	MAP3K7IP1	22	hsa-miR-9*	5	-0.38533	0.00646402	0.000176572
940504	NM_006116.2	MAP3K7IP1	22	hsa-miR-9*	15	-0.38533	0.00646402	0.000176572
940632	NM_004433.3	ELF3	1	hsa-miR-10a	17	0.437774	0.000920767	1.59682e-05
940632	NM_004433.3	ELF3	1	hsa-miR-18b	X	0.360942	0.00784317	0.00047419
940632	NM_004433.3	ELF3	1	hsa-miR-20b	X	0.372362	0.00621399	0.000301468
940725	NM_032796.2	SYAP1	X	hsa-miR-18b	X	0.355213	0.00912379	0.000591463
940735	NM_001035230.1	RABGAP1L	1	hsa-miR-192	11	-0.430569	0.00448118	2.27558e-05
940735	NM_001035230.1	RABGAP1L	1	hsa-miR-20b	X	-0.375096	0.00575385	0.000269813
940735	NM_001035230.1	RABGAP1L	1	hsa-miR-339	7	-0.436654	0.00235078	1.68811e-05
940735	NM_001035230.1	RABGAP1L	1	hsa-miR-363	X	-0.411965	0.00157013	5.47669e-05
990181	NM_001003945.1	ALAD	9	hsa-miR-181a	1	0.376969	0.00680069	0.000249927
990181	NM_001003945.1	ALAD	9	hsa-miR-181a	9	0.376969	0.00680069	0.000249927
990181	NM_001003945.1	ALAD	9	hsa-miR-213	1	0.392424	0.00550728	0.000130525
990239	NM_017891.2	C1orf159	1	hsa-miR-194	1	0.413766	0.00633742	5.04157e-05
990239	NM_017891.2	C1orf159	1	hsa-miR-194	11	0.413766	0.00633742	5.04157e-05
990288	NM_020199.1	C5orf15	5	hsa-miR-130a	11	0.484284	0.00122743	1.32321e-06
990288	NM_020199.1	C5orf15	5	hsa-miR-18b	X	0.371461	0.00586164	0.000312627
990288	NM_020199.1	C5orf15	5	hsa-miR-9*	1	-0.392154	0.00562116	0.000132051
990288	NM_020199.1	C5orf15	5	hsa-miR-9*	5	-0.392154	0.00562116	0.000132051
990288	NM_020199.1	C5orf15	5	hsa-miR-9*	15	-0.392154	0.00562116	0.000132051
990288	NM_020199.1	C5orf15	5	hsa-miR-98	X	-0.440295	0.00230064	1.40799e-05
990341	BX094697		10	hsa-miR-98	X	0.391093	0.00650956	0.00013821
990440	XM_935706.1	LOC641945	7	hsa-miR-363	X	-0.360677	0.00734449	0.000479106
990528	NM_016186.2	SERPINA10	14	hsa-miR-130a	11	-0.492945	0.000925425	7.98146e-07
990546	NM_006852.2	TLK2	17	hsa-miR-20b	X	-0.361975	0.00828859	0.000455466
990546	NM_006852.2	TLK2	17	hsa-miR-363	X	-0.397613	0.00247302	0.000104186
990592	NM_033502.1	TRERF1	6	hsa-miR-363	X	-0.359491	0.00754031	0.000501683
990592	NM_033502.1	TRERF1	6	hsa-miR-9*	1	0.42066	0.00275883	3.65626e-05
990592	NM_033502.1	TRERF1	6	hsa-miR-9*	5	0.42066	0.00275883	3.65626e-05
990592	NM_033502.1	TRERF1	6	hsa-miR-9*	15	0.42066	0.00275883	3.65626e-05
990603	NM_014573.2	TMEM97	17	hsa-miR-18b	X	-0.403564	0.00232239	8.00833e-05
990603	NM_014573.2	TMEM97	17	hsa-miR-20b	X	-0.359307	0.00882376	0.000505272
990603	NM_014573.2	TMEM97	17	hsa-miR-33b	17	-0.399202	0.00916141	9.71646e-05
990603	NM_014573.2	TMEM97	17	hsa-miR-363	X	-0.409448	0.00170054	6.14359e-05
990603	NM_014573.2	TMEM97	17	hsa-miR-486	8	-0.459653	0.0017039	5.17778e-06
990647	NM_006397.2	RNASEH2A	19	hsa-miR-331	12	-0.450925	0.00117819	8.19046e-06
990669	NM_005389.1	PCMT1	6	hsa-miR-151	8	-0.465757	0.00133739	3.72879e-06
990669	NM_005389.1	PCMT1	6	hsa-miR-18b	X	0.446808	0.000512116	1.01245e-05
990669	NM_005389.1	PCMT1	6	hsa-miR-20b	X	0.408205	0.00205268	6.50011e-05
990669	NM_005389.1	PCMT1	6	hsa-miR-331	12	-0.443903	0.0014463	1.17387e-05
990669	NM_005389.1	PCMT1	6	hsa-miR-363	X	0.479721	0.00012036	1.7175e-06
990669	NM_005389.1	PCMT1	6	hsa-miR-9*	1	-0.391803	0.00568021	0.00013406
990669	NM_005389.1	PCMT1	6	hsa-miR-9*	5	-0.391803	0.00568021	0.00013406
990669	NM_005389.1	PCMT1	6	hsa-miR-9*	15	-0.391803	0.00568021	0.00013406
990687	NM_020236.3	MRPL1	4	HS_243.1	16	0.509139	0.00349315	2.98562e-07
990746	NM_030665.3	RAI1	17	hsa-miR-181a	1	0.467641	0.000327121	3.36516e-06
990746	NM_030665.3	RAI1	17	hsa-miR-181a	9	0.467641	0.000327121	3.36516e-06
990746	NM_030665.3	RAI1	17	hsa-miR-181b	1	0.421642	0.00168837	3.49071e-05
990746	NM_030665.3	RAI1	17	hsa-miR-181b	9	0.421642	0.00168837	3.49071e-05
990746	NM_030665.3	RAI1	17	hsa-miR-181c	19	0.390183	0.00508661	0.000143704
990746	NM_030665.3	RAI1	17	hsa-miR-192	11	0.420064	0.0055566	3.76027e-05
990746	NM_030665.3	RAI1	17	hsa-miR-20b	X	0.358763	0.00889987	0.000516021
990746	NM_030665.3	RAI1	17	hsa-miR-213	1	0.482963	0.000312603	1.42754e-06
990746	NM_030665.3	RAI1	17	hsa-miR-363	X	0.392787	0.0029039	0.000128498
1010068	NM_007350.3	PHLDA1	12	hsa-miR-10a	17	0.454501	0.000516278	6.7978e-06
1010114	NM_022104.3	C20orf67	20	hsa-miR-18b	X	0.413936	0.00167382	5.0022e-05
1010114	NM_022104.3	C20orf67	20	hsa-miR-20b	X	0.360731	0.00863196	0.0004781
1010114	NM_022104.3	C20orf67	20	hsa-miR-363	X	0.434777	0.000730107	1.85213e-05
1010114	NM_022104.3	C20orf67	20	hsa-miR-9*	1	-0.413136	0.00329852	5.18998e-05
1010114	NM_022104.3	C20orf67	20	hsa-miR-9*	5	-0.413136	0.00329852	5.18998e-05
1010114	NM_022104.3	C20orf67	20	hsa-miR-9*	15	-0.413136	0.00329852	5.18998e-05
1010142	AK123915		5	hsa-miR-181a	1	0.402949	0.00318051	8.23097e-05
1010142	AK123915		5	hsa-miR-181a	9	0.402949	0.00318051	8.23097e-05
1010142	AK123915		5	hsa-miR-181c	19	0.400127	0.00375215	9.32823e-05
1010142	AK123915		5	hsa-miR-213	1	0.47101	0.000464386	2.79676e-06
1010142	AK123915		5	hsa-miR-30b	8	0.459097	0.0030849	5.33328e-06
1010156	NM_024644.2	C14orf169	14	hsa-miR-18b	X	-0.373733	0.00550137	0.000285191
1010161	NM_024053.3	CENPM	22	hsa-miR-10a	17	0.408585	0.00245933	6.38912e-05
1010161	NM_024053.3	CENPM	22	hsa-miR-130b	22	0.495767	0.000943707	6.74896e-07
1010161	NM_024053.3	CENPM	22	hsa-miR-151	8	-0.448393	0.00269823	9.33404e-06
1010161	NM_024053.3	CENPM	22	hsa-miR-18b	X	0.40065	0.00254169	9.11515e-05
1010161	NM_024053.3	CENPM	22	hsa-miR-20b	X	0.406901	0.00211416	6.89473e-05
1010161	NM_024053.3	CENPM	22	hsa-miR-331	12	-0.434224	0.00180701	1.90323e-05
1010161	NM_024053.3	CENPM	22	hsa-miR-363	X	0.414445	0.00145267	4.88605e-05
1010161	NM_024053.3	CENPM	22	hsa-miR-486	8	0.464461	0.00159427	4.00008e-06
1010228	NM_018279.3	TMEM19	12	hsa-miR-20b	X	-0.416154	0.00158582	4.51417e-05
1010228	NM_018279.3	TMEM19	12	hsa-miR-363	X	-0.407678	0.00179756	6.65699e-05
1010343	NM_003141.3	TRIM21	11	hsa-miR-181b	1	0.420813	0.00173131	3.62999e-05
1010343	NM_003141.3	TRIM21	11	hsa-miR-181b	9	0.420813	0.00173131	3.62999e-05
1010343	NM_003141.3	TRIM21	11	hsa-miR-221	X	0.387293	0.00616799	0.000162519
1010343	NM_003141.3	TRIM21	11	hsa-miR-222	X	0.39811	0.00530471	0.000101941
1010343	NM_003141.3	TRIM21	11	hsa-miR-34b	11	-0.440025	0.00716974	1.42717e-05
1010762	NM_025140.1	CCDC92	12	hsa-miR-151	8	0.439618	0.00363409	1.45653e-05
1010768	BQ005416		X	HS_188	12	-0.440526	0.00983762	1.39178e-05
1030014	NM_001099668.1	HIGD1A	3	hsa-miR-9	1	0.421767	0.00312999	3.47014e-05
1030014	NM_001099668.1	HIGD1A	3	hsa-miR-9	5	0.421767	0.00312999	3.47014e-05
1030014	NM_001099668.1	HIGD1A	3	hsa-miR-9	15	0.421767	0.00312999	3.47014e-05
1030014	NM_001099668.1	HIGD1A	3	hsa-miR-9*	1	0.419534	0.00278555	3.85509e-05
1030014	NM_001099668.1	HIGD1A	3	hsa-miR-9*	5	0.419534	0.00278555	3.85509e-05
1030014	NM_001099668.1	HIGD1A	3	hsa-miR-9*	15	0.419534	0.00278555	3.85509e-05
1030040	BE672556		3	hsa-miR-9*	1	-0.378176	0.00766425	0.000237837
1030040	BE672556		3	hsa-miR-9*	5	-0.378176	0.00766425	0.000237837
1030040	BE672556		3	hsa-miR-9*	15	-0.378176	0.00766425	0.000237837
1030040	BE672556		3	hsa-miR-98	X	-0.378902	0.00876741	0.000230827
1030059	NM_005515.3	HLXB9	7	hsa-miR-10a	17	0.617418	1.53e-07	9.0872e-11
1030059	NM_005515.3	HLXB9	7	hsa-miR-130b	22	0.430135	0.00541621	2.32406e-05
1030059	NM_005515.3	HLXB9	7	hsa-miR-181a	1	0.495876	0.000113635	6.70517e-07
1030059	NM_005515.3	HLXB9	7	hsa-miR-181a	9	0.495876	0.000113635	6.70517e-07
1030059	NM_005515.3	HLXB9	7	hsa-miR-181b	1	0.427001	0.00147387	2.7039e-05
1030059	NM_005515.3	HLXB9	7	hsa-miR-181b	9	0.427001	0.00147387	2.7039e-05
1030059	NM_005515.3	HLXB9	7	hsa-miR-181c	19	0.451031	0.000701216	8.14558e-06
1030059	NM_005515.3	HLXB9	7	hsa-miR-18b	X	0.67624	5.63e-10	2.59074e-13
1030059	NM_005515.3	HLXB9	7	hsa-miR-192	11	0.557802	3.81e-05	1.12087e-08
1030059	NM_005515.3	HLXB9	7	hsa-miR-194	1	0.555719	1.99e-05	1.3041e-08
1030059	NM_005515.3	HLXB9	7	hsa-miR-194	11	0.555719	1.99e-05	1.3041e-08
1030059	NM_005515.3	HLXB9	7	hsa-miR-20b	X	0.682559	2.31e-10	1.27298e-13
1030059	NM_005515.3	HLXB9	7	hsa-miR-213	1	0.417044	0.00275236	4.33112e-05
1030059	NM_005515.3	HLXB9	7	hsa-miR-215	1	0.499735	0.00174649	5.31739e-07
1030059	NM_005515.3	HLXB9	7	hsa-miR-363	X	0.680383	3.6e-10	1.62914e-13
1030059	NM_005515.3	HLXB9	7	hsa-miR-486	8	0.455768	0.00188069	6.36021e-06
1030059	NM_005515.3	HLXB9	7	hsa-miR-618	12	0.511446	0.00156797	2.58455e-07
1030086	NM_024491.2	CEP70	3	hsa-miR-221	X	0.383122	0.00700615	0.000193714
1030189	NM_001431.1	EPB41L2	6	hsa-miR-181a	1	0.472095	0.000273589	2.63388e-06
1030189	NM_001431.1	EPB41L2	6	hsa-miR-181a	9	0.472095	0.000273589	2.63388e-06
1030189	NM_001431.1	EPB41L2	6	hsa-miR-181b	1	0.461977	0.000440647	4.57281e-06
1030189	NM_001431.1	EPB41L2	6	hsa-miR-181b	9	0.461977	0.000440647	4.57281e-06
1030189	NM_001431.1	EPB41L2	6	hsa-miR-181c	19	0.452907	0.000690024	7.38856e-06
1030189	NM_001431.1	EPB41L2	6	hsa-miR-213	1	0.457387	0.000791018	5.83954e-06
1030189	NM_001431.1	EPB41L2	6	hsa-miR-486	8	0.390081	0.00994769	0.000144332
1030368	NM_006729.3	DIAPH2	X	hsa-miR-33b	17	0.411351	0.00757173	5.63285e-05
1030398	NM_002485.4	NBN	8	hsa-miR-625	14	-0.429104	0.00608151	2.44313e-05
1030538	NM_018956.3	C9orf9	9	hsa-miR-181b	1	-0.383893	0.00514892	0.000187561
1030538	NM_018956.3	C9orf9	9	hsa-miR-181b	9	-0.383893	0.00514892	0.000187561
1030538	NM_018956.3	C9orf9	9	hsa-miR-181c	19	-0.372337	0.00787801	0.000301773
1030685	NM_000663.3	ABAT	16	hsa-miR-331	12	0.386843	0.00691954	0.000165646
1050180	NM_018270.3	C20orf20	20	hsa-miR-222	X	0.379778	0.00843955	0.000222622
1050180	NM_018270.3	C20orf20	20	hsa-miR-331	12	-0.420956	0.00273861	3.6056e-05
1050180	NM_018270.3	C20orf20	20	hsa-miR-339	7	0.435288	0.00235078	1.80606e-05
1050180	NM_018270.3	C20orf20	20	hsa-miR-33b	17	0.412958	0.00751957	5.23264e-05
1050180	NM_018270.3	C20orf20	20	hsa-miR-9	1	-0.440749	0.00179912	1.3763e-05
1050180	NM_018270.3	C20orf20	20	hsa-miR-9	5	-0.440749	0.00179912	1.3763e-05
1050180	NM_018270.3	C20orf20	20	hsa-miR-9	15	-0.440749	0.00179912	1.3763e-05
1050180	NM_018270.3	C20orf20	20	hsa-miR-9*	1	-0.465063	0.000782178	3.87183e-06
1050180	NM_018270.3	C20orf20	20	hsa-miR-9*	5	-0.465063	0.000782178	3.87183e-06
1050180	NM_018270.3	C20orf20	20	hsa-miR-9*	15	-0.465063	0.000782178	3.87183e-06
1050180	NM_018270.3	C20orf20	20	hsa-miR-98	X	-0.484534	0.000868838	1.30429e-06
1050192	XM_001128032.1	MGC87042	7	hsa-miR-10a	17	0.391102	0.00417445	0.000138157
1050192	XM_001128032.1	MGC87042	7	hsa-miR-18b	X	0.499346	5.51e-05	5.44385e-07
1050192	XM_001128032.1	MGC87042	7	hsa-miR-20b	X	0.543323	6.78e-06	3.14379e-08
1050192	XM_001128032.1	MGC87042	7	hsa-miR-363	X	0.455718	0.000319934	6.37697e-06
1050215	NM_001542.2	IGSF3	1	hsa-miR-181b	1	-0.359873	0.0099863	0.000494307
1050215	NM_001542.2	IGSF3	1	hsa-miR-181b	9	-0.359873	0.0099863	0.000494307
1050215	NM_001542.2	IGSF3	1	hsa-miR-18b	X	-0.360003	0.00802773	0.00049182
1050215	NM_001542.2	IGSF3	1	hsa-miR-222	X	-0.427552	0.00221533	2.63317e-05
1050215	NM_001542.2	IGSF3	1	hsa-miR-363	X	-0.379913	0.00423114	0.000221382
1050215	NM_001542.2	IGSF3	1	hsa-miR-9	1	0.470241	0.000878906	2.9179e-06
1050215	NM_001542.2	IGSF3	1	hsa-miR-9	5	0.470241	0.000878906	2.9179e-06
1050215	NM_001542.2	IGSF3	1	hsa-miR-9	15	0.470241	0.000878906	2.9179e-06
1050215	NM_001542.2	IGSF3	1	hsa-miR-9*	1	0.473647	0.000631865	2.41638e-06
1050215	NM_001542.2	IGSF3	1	hsa-miR-9*	5	0.473647	0.000631865	2.41638e-06
1050215	NM_001542.2	IGSF3	1	hsa-miR-9*	15	0.473647	0.000631865	2.41638e-06
1050253	NM_015439.2	CCDC28A	6	hsa-miR-151	8	0.417393	0.00741011	4.26125e-05
1050343	BX109571		8	hsa-miR-130a	11	-0.407353	0.00915038	6.75549e-05
1050370	NM_032499.3	C15orf41	15	hsa-miR-139	11	-0.437784	0.00901906	1.59603e-05
1050370	NM_032499.3	C15orf41	15	hsa-miR-30b	8	0.444427	0.00362587	1.14307e-05
1050379	NM_177989.2	ACTL6A	3	hsa-miR-331	12	-0.425498	0.00239912	2.90596e-05
1050379	NM_177989.2	ACTL6A	3	hsa-miR-98	X	-0.375461	0.00959192	0.000265827
1050414	NR_002449.1	SNORA65	9	HS_188	12	0.440271	0.00983762	1.40969e-05
1050414	NR_002449.1	SNORA65	9	HS_200	12	0.469286	0.00406846	3.07524e-06
1050450	NM_004854.3	CHST10	2	hsa-miR-10a	17	-0.457629	0.000454111	5.76525e-06
1050639	NM_174942.1	GAS2L3	12	hsa-miR-10a	17	0.358523	0.00970273	0.000520829
1050673	NM_175058.3	PLEKHA7	11	hsa-miR-181a	1	-0.38474	0.00546421	0.00018101
1050673	NM_175058.3	PLEKHA7	11	hsa-miR-181a	9	-0.38474	0.00546421	0.00018101
1050673	NM_175058.3	PLEKHA7	11	hsa-miR-181b	1	-0.384625	0.00509674	0.000181886
1050673	NM_175058.3	PLEKHA7	11	hsa-miR-181b	9	-0.384625	0.00509674	0.000181886
1050673	NM_175058.3	PLEKHA7	11	hsa-miR-213	1	-0.393165	0.00540048	0.000126419
1050692	NM_014875.1	KIF14	1	hsa-miR-331	12	-0.422403	0.00259916	3.36725e-05
1050692	NM_014875.1	KIF14	1	hsa-miR-98	X	-0.455351	0.00188413	6.50122e-06
1070050	NM_024312.3	GNPTAB	12	hsa-miR-213	1	-0.424741	0.00221467	3.01299e-05
1070050	NM_024312.3	GNPTAB	12	hsa-miR-30b	8	-0.451828	0.00346394	7.81548e-06
1070070	NM_001012978.1	NGFRAP1L1	X	hsa-miR-130a	11	-0.425205	0.00595341	2.94696e-05
1070070	NM_001012978.1	NGFRAP1L1	X	hsa-miR-221	X	-0.393132	0.00525902	0.000126599
1070070	NM_001012978.1	NGFRAP1L1	X	hsa-miR-9*	1	0.394631	0.00537544	0.000118647
1070070	NM_001012978.1	NGFRAP1L1	X	hsa-miR-9*	5	0.394631	0.00537544	0.000118647
1070070	NM_001012978.1	NGFRAP1L1	X	hsa-miR-9*	15	0.394631	0.00537544	0.000118647
1070326	NM_017923.2	MARCH1	4	hsa-miR-221	X	0.455897	0.000690791	6.31718e-06
1070326	NM_017923.2	MARCH1	4	hsa-miR-222	X	0.456404	0.000781139	6.15067e-06
1070326	NM_017923.2	MARCH1	4	hsa-miR-339	7	0.409924	0.00499273	6.01195e-05
1070326	NM_017923.2	MARCH1	4	hsa-miR-424	X	-0.485272	0.00259573	1.24993e-06
1070326	NM_017923.2	MARCH1	4	hsa-miR-551b	3	-0.47361	0.0020363	2.42136e-06
1070427	XM_936467.2	BEXL1	X	hsa-miR-103	5	-0.462716	0.0096438	4.39482e-06
1070427	XM_936467.2	BEXL1	X	hsa-miR-103	20	-0.462716	0.0096438	4.39482e-06
1070451	NM_016368.3	ISYNA1	19	hsa-miR-181a	1	0.567821	3.91e-06	5.33188e-09
1070451	NM_016368.3	ISYNA1	19	hsa-miR-181a	9	0.567821	3.91e-06	5.33188e-09
1070451	NM_016368.3	ISYNA1	19	hsa-miR-181b	1	0.525837	2.93e-05	1.02554e-07
1070451	NM_016368.3	ISYNA1	19	hsa-miR-181b	9	0.525837	2.93e-05	1.02554e-07
1070451	NM_016368.3	ISYNA1	19	hsa-miR-181c	19	0.53542	2.67e-05	5.4093e-08
1070451	NM_016368.3	ISYNA1	19	hsa-miR-20b	X	0.43507	0.000807127	1.82558e-05
1070451	NM_016368.3	ISYNA1	19	hsa-miR-213	1	0.552676	1.44e-05	1.62391e-08
1070451	NM_016368.3	ISYNA1	19	hsa-miR-30b	8	0.420693	0.00732597	3.65058e-05
1070451	NM_016368.3	ISYNA1	19	hsa-miR-363	X	0.433764	0.000757237	1.94673e-05
1070528	NM_005101.2	ISG15	1	hsa-miR-10a	17	0.45312	0.000535642	7.30692e-06
1070528	NM_005101.2	ISG15	1	hsa-miR-181b	1	0.430221	0.00136595	2.31438e-05
1070528	NM_005101.2	ISG15	1	hsa-miR-181b	9	0.430221	0.00136595	2.31438e-05
1070528	NM_005101.2	ISG15	1	hsa-miR-181c	19	0.396465	0.00417343	0.000109548
1070528	NM_005101.2	ISG15	1	hsa-miR-18b	X	0.486795	9.67e-05	1.14445e-06
1070528	NM_005101.2	ISG15	1	hsa-miR-20b	X	0.459449	0.000316266	5.23433e-06
1070528	NM_005101.2	ISG15	1	hsa-miR-339	7	0.463614	0.00124059	4.18732e-06
1070528	NM_005101.2	ISG15	1	hsa-miR-363	X	0.518593	1.88e-05	1.64187e-07
1070544	NM_001003795.2	GTF2IRD2B	7	hsa-miR-20b	X	0.407356	0.00209657	6.75457e-05
1070544	NM_001003795.2	GTF2IRD2B	7	hsa-miR-363	X	0.376408	0.00468494	0.000255737
1070603	NM_001080854.1	LOC728776	21	hsa-miR-551a	1	-0.435685	0.00797223	1.771e-05
1070743	CA944851		18	hsa-miR-181b	1	0.391713	0.00416689	0.00013458
1070743	CA944851		18	hsa-miR-181b	9	0.391713	0.00416689	0.00013458
1070743	CA944851		18	hsa-miR-181c	19	0.43474	0.00121605	1.85551e-05
1090022	NM_175931.1	CBFA2T3	16	hsa-miR-221	X	-0.374364	0.00857181	0.000277974
1090022	NM_175931.1	CBFA2T3	16	hsa-miR-222	X	-0.431734	0.00195042	2.15008e-05
1090048	NM_153611.3	CYBASC3	11	hsa-miR-10a	17	-0.425427	0.00136559	2.91585e-05
1090048	NM_153611.3	CYBASC3	11	hsa-miR-181a	1	-0.42538	0.00157713	2.92241e-05
1090048	NM_153611.3	CYBASC3	11	hsa-miR-181a	9	-0.42538	0.00157713	2.92241e-05
1090048	NM_153611.3	CYBASC3	11	hsa-miR-181b	1	-0.384971	0.0050683	0.00017926
1090048	NM_153611.3	CYBASC3	11	hsa-miR-181b	9	-0.384971	0.0050683	0.00017926
1090048	NM_153611.3	CYBASC3	11	hsa-miR-181c	19	-0.430073	0.00148617	2.33107e-05
1090048	NM_153611.3	CYBASC3	11	hsa-miR-18b	X	-0.445923	0.000526807	1.05927e-05
1090048	NM_153611.3	CYBASC3	11	hsa-miR-20b	X	-0.461032	0.000298022	4.8103e-06
1090048	NM_153611.3	CYBASC3	11	hsa-miR-213	1	-0.387246	0.00642325	0.000162843
1090048	NM_153611.3	CYBASC3	11	hsa-miR-30b	8	-0.426653	0.00693237	2.74948e-05
1090048	NM_153611.3	CYBASC3	11	hsa-miR-363	X	-0.38514	0.00364646	0.00017799
1090139	NM_016464.3	TMEM138	11	hsa-miR-10a	17	-0.410314	0.002305	5.90605e-05
1090139	NM_016464.3	TMEM138	11	hsa-miR-130b	22	-0.433395	0.00524407	1.9823e-05
1090139	NM_016464.3	TMEM138	11	hsa-miR-181a	1	-0.388667	0.00493655	0.000153307
1090139	NM_016464.3	TMEM138	11	hsa-miR-181a	9	-0.388667	0.00493655	0.000153307
1090139	NM_016464.3	TMEM138	11	hsa-miR-181b	1	-0.47127	0.000295844	2.75688e-06
1090139	NM_016464.3	TMEM138	11	hsa-miR-181b	9	-0.47127	0.000295844	2.75688e-06
1090139	NM_016464.3	TMEM138	11	hsa-miR-181c	19	-0.390331	0.00508661	0.000142797
1090139	NM_016464.3	TMEM138	11	hsa-miR-18b	X	-0.484512	0.000108204	1.30595e-06
1090139	NM_016464.3	TMEM138	11	hsa-miR-20b	X	-0.429859	0.000992916	2.3554e-05
1090139	NM_016464.3	TMEM138	11	hsa-miR-213	1	-0.394251	0.0052395	0.000120618
1090139	NM_016464.3	TMEM138	11	hsa-miR-30b	8	-0.451153	0.00346394	8.09422e-06
1090139	NM_016464.3	TMEM138	11	hsa-miR-363	X	-0.363055	0.00682582	0.000436618
1090332	NM_032830.1	CIRH1A	16	hsa-miR-181a	1	-0.40043	0.0034732	9.20422e-05
1090332	NM_032830.1	CIRH1A	16	hsa-miR-181a	9	-0.40043	0.0034732	9.20422e-05
1090332	NM_032830.1	CIRH1A	16	hsa-miR-181c	19	-0.375136	0.00733893	0.000269374
1090520	XM_929546.1	LOC646609	9	hsa-miR-339	7	-0.402705	0.00580466	8.32088e-05
1090673	NM_202003.1	FOXM1	12	hsa-miR-18b	X	0.370227	0.00609427	0.000328527
1090673	NM_202003.1	FOXM1	12	hsa-miR-34b	11	-0.45256	0.00704965	7.5234e-06
1090747	NM_002396.3	ME2	18	hsa-miR-181a	1	-0.422235	0.00175584	3.39415e-05
1090747	NM_002396.3	ME2	18	hsa-miR-181a	9	-0.422235	0.00175584	3.39415e-05
1090747	NM_002396.3	ME2	18	hsa-miR-181c	19	-0.379894	0.00667669	0.000221556
1110164	NM_002569.2	FURIN	15	hsa-miR-9	1	0.437332	0.00198967	1.63228e-05
1110164	NM_002569.2	FURIN	15	hsa-miR-9	5	0.437332	0.00198967	1.63228e-05
1110164	NM_002569.2	FURIN	15	hsa-miR-9	15	0.437332	0.00198967	1.63228e-05
1110164	NM_002569.2	FURIN	15	hsa-miR-9*	1	0.452796	0.00110297	7.43145e-06
1110164	NM_002569.2	FURIN	15	hsa-miR-9*	5	0.452796	0.00110297	7.43145e-06
1110164	NM_002569.2	FURIN	15	hsa-miR-9*	15	0.452796	0.00110297	7.43145e-06
1110279	NM_025238.3	BTBD1	15	hsa-miR-18b	X	-0.406044	0.00214402	7.1661e-05
1110279	NM_025238.3	BTBD1	15	hsa-miR-20b	X	-0.453971	0.000400913	6.98911e-06
1110279	NM_025238.3	BTBD1	15	hsa-miR-363	X	-0.373502	0.00513719	0.000287875
1110524	XM_938089.2	LOC643007	15	hsa-miR-10a	17	-0.379588	0.0056129	0.000224379
1110575	NM_006720.3	ABLIM1	10	hsa-miR-10a	17	-0.44525	0.000694822	1.09623e-05
1110575	NM_006720.3	ABLIM1	10	hsa-miR-151	8	0.43217	0.00488056	2.1048e-05
1110575	NM_006720.3	ABLIM1	10	hsa-miR-18b	X	-0.374813	0.00531224	0.000272942
1110639	DB341251		6	HS_200	12	-0.427182	0.00933511	2.68047e-05
1110687	NM_173804.3	TMEM86B	19	hsa-miR-10a	17	-0.385702	0.00472156	0.000173825
1110687	NM_173804.3	TMEM86B	19	hsa-miR-18b	X	-0.355015	0.00916619	0.000595954
1110687	NM_173804.3	TMEM86B	19	hsa-miR-33b	17	-0.443849	0.00382027	1.17709e-05
1170095	NM_006166.3	NFYB	12	hsa-miR-9*	1	-0.381494	0.00709978	0.000207325
1170095	NM_006166.3	NFYB	12	hsa-miR-9*	5	-0.381494	0.00709978	0.000207325
1170095	NM_006166.3	NFYB	12	hsa-miR-9*	15	-0.381494	0.00709978	0.000207325
1170278	XM_940851.1	FLJ16686	4	hsa-miR-181a	1	-0.441934	0.000921031	1.29668e-05
1170278	XM_940851.1	FLJ16686	4	hsa-miR-181a	9	-0.441934	0.000921031	1.29668e-05
1170278	XM_940851.1	FLJ16686	4	hsa-miR-181b	1	-0.39261	0.00404888	0.000129483
1170278	XM_940851.1	FLJ16686	4	hsa-miR-181b	9	-0.39261	0.00404888	0.000129483
1170278	XM_940851.1	FLJ16686	4	hsa-miR-18b	X	-0.379759	0.00469334	0.000222797
1170278	XM_940851.1	FLJ16686	4	hsa-miR-213	1	-0.396655	0.00498539	0.000108643
1170278	XM_940851.1	FLJ16686	4	hsa-miR-30a-5p	6	-0.480588	0.000778606	1.63494e-06
1170278	XM_940851.1	FLJ16686	4	hsa-miR-30b	8	-0.492233	0.000909545	8.32451e-07
1170278	XM_940851.1	FLJ16686	4	hsa-miR-30d	8	-0.427114	0.009689	2.68925e-05
1170278	XM_940851.1	FLJ16686	4	hsa-miR-363	X	-0.349662	0.00971755	0.000729842
1170296	NM_181573.1	RFC4	3	hsa-miR-331	12	-0.372668	0.00995442	0.000297763
1170341	NM_021603.2	FXYD2	11	hsa-miR-10a	17	0.438581	0.00090428	1.53394e-05
1170341	NM_021603.2	FXYD2	11	hsa-miR-130b	22	0.45823	0.0027331	5.58457e-06
1170341	NM_021603.2	FXYD2	11	hsa-miR-18b	X	0.422908	0.0012171	3.28759e-05
1170341	NM_021603.2	FXYD2	11	hsa-miR-363	X	0.449174	0.00042338	8.96623e-06
1170403	XM_927169.1	LOC643904	17	hsa-miR-10a	17	-0.366638	0.00798943	0.000379093
1170471	NM_004900.3	APOBEC3B	22	hsa-miR-363	X	0.354675	0.0084672	0.000603739
1170497	NM_001040023.1	SIRPA	20	hsa-miR-192	11	-0.438173	0.00389298	1.56544e-05
1170497	NM_001040023.1	SIRPA	20	hsa-miR-194	1	-0.432518	0.00380837	2.0693e-05
1170497	NM_001040023.1	SIRPA	20	hsa-miR-194	11	-0.432518	0.00380837	2.0693e-05
1170497	NM_001040023.1	SIRPA	20	hsa-miR-20b	X	-0.367867	0.00705178	0.000361024
1170554	NM_012073.3	CCT5	5	hsa-miR-331	12	-0.418106	0.00288986	4.12176e-05
1190026	NM_170726.1	ALDH4A1	1	hsa-miR-331	12	0.423243	0.00256012	3.23572e-05
1190026	NM_170726.1	ALDH4A1	1	hsa-miR-98	X	0.424679	0.00333476	3.02192e-05
1190161	NM_002794.3	PSMB2	1	hsa-miR-363	X	0.349713	0.00971755	0.000728446
1190181	NM_139315.1	TAF6	7	hsa-miR-181b	1	0.370179	0.00758141	0.00032916
1190181	NM_139315.1	TAF6	7	hsa-miR-181b	9	0.370179	0.00758141	0.00032916
1190204	NM_152562.2	CDCA2	8	hsa-miR-331	12	-0.379961	0.00835732	0.000220943
1190204	NM_152562.2	CDCA2	8	hsa-miR-33b	17	0.398839	0.00916141	9.87287e-05
1190204	NM_152562.2	CDCA2	8	hsa-miR-98	X	-0.385504	0.00736874	0.000175282
1190273	NM_003672.3	CDC14A	1	hsa-miR-181b	1	0.382617	0.00533813	0.000197845
1190273	NM_003672.3	CDC14A	1	hsa-miR-181b	9	0.382617	0.00533813	0.000197845
1190349	NM_002759.1	EIF2AK2	2	hsa-miR-98	X	-0.383907	0.00762129	0.000187451
1190441	NM_174921.1	C4orf34	4	hsa-miR-98	X	-0.390147	0.00652574	0.000143925
1190497	AB074172		5	hsa-miR-10a	17	0.411516	0.00222303	5.59049e-05
1190497	AB074172		5	hsa-miR-181a	1	0.637485	3.42e-08	1.41694e-11
1190497	AB074172		5	hsa-miR-181a	9	0.637485	3.42e-08	1.41694e-11
1190497	AB074172		5	hsa-miR-181b	1	0.631266	1.21e-07	2.55691e-11
1190497	AB074172		5	hsa-miR-181b	9	0.631266	1.21e-07	2.55691e-11
1190497	AB074172		5	hsa-miR-181c	19	0.611537	5.88e-07	1.52848e-10
1190497	AB074172		5	hsa-miR-18b	X	0.404108	0.00228193	7.81607e-05
1190497	AB074172		5	hsa-miR-192	11	0.471906	0.00142832	2.66159e-06
1190497	AB074172		5	hsa-miR-194	1	0.413314	0.00635344	5.14764e-05
1190497	AB074172		5	hsa-miR-194	11	0.413314	0.00635344	5.14764e-05
1190497	AB074172		5	hsa-miR-20b	X	0.454183	0.000399011	6.91199e-06
1190497	AB074172		5	hsa-miR-213	1	0.540394	2.48e-05	3.85044e-08
1190497	AB074172		5	hsa-miR-30a-5p	6	0.50911	0.000409515	2.99102e-07
1190497	AB074172		5	hsa-miR-30d	8	0.437429	0.00833741	1.62444e-05
1190497	AB074172		5	hsa-miR-363	X	0.503198	4.18e-05	4.30788e-07
1190707	NM_033046.2	RTKN	2	hsa-miR-10a	17	0.550595	8.83e-06	1.88432e-08
1190707	NM_033046.2	RTKN	2	hsa-miR-130a	11	0.471986	0.00167187	2.64983e-06
1190707	NM_033046.2	RTKN	2	hsa-miR-18b	X	0.598617	2.11e-07	4.61752e-10
1190707	NM_033046.2	RTKN	2	hsa-miR-20b	X	0.606681	1.21e-07	2.32946e-10
1190707	NM_033046.2	RTKN	2	hsa-miR-363	X	0.542998	5.57e-06	3.21563e-08
1230040	NM_001017977.1	IQWD1	1	hsa-miR-181a	1	0.40946	0.00263623	6.14024e-05
1230040	NM_001017977.1	IQWD1	1	hsa-miR-181a	9	0.40946	0.00263623	6.14024e-05
1230040	NM_001017977.1	IQWD1	1	hsa-miR-194	1	0.433061	0.00377726	2.01502e-05
1230040	NM_001017977.1	IQWD1	1	hsa-miR-194	11	0.433061	0.00377726	2.01502e-05
1230093	NM_000208.2	INSR	19	hsa-miR-9	1	-0.42207	0.00312999	3.42076e-05
1230093	NM_000208.2	INSR	19	hsa-miR-9	5	-0.42207	0.00312999	3.42076e-05
1230093	NM_000208.2	INSR	19	hsa-miR-9	15	-0.42207	0.00312999	3.42076e-05
1230093	NM_000208.2	INSR	19	hsa-miR-9*	1	-0.401727	0.00437009	8.6905e-05
1230093	NM_000208.2	INSR	19	hsa-miR-9*	5	-0.401727	0.00437009	8.6905e-05
1230093	NM_000208.2	INSR	19	hsa-miR-9*	15	-0.401727	0.00437009	8.6905e-05
1230273	NM_020807.1	ZNF319	16	hsa-miR-10a	17	-0.358983	0.00962783	0.000511649
1230402	NM_002158.3	FOXN2	2	hsa-miR-33b	17	0.39392	0.00986467	0.00012236
1230402	NM_002158.3	FOXN2	2	hsa-miR-9	1	-0.430668	0.00237531	2.26466e-05
1230402	NM_002158.3	FOXN2	2	hsa-miR-9	5	-0.430668	0.00237531	2.26466e-05
1230402	NM_002158.3	FOXN2	2	hsa-miR-9	15	-0.430668	0.00237531	2.26466e-05
1230402	NM_002158.3	FOXN2	2	hsa-miR-9*	1	-0.416062	0.00300306	4.5335e-05
1230402	NM_002158.3	FOXN2	2	hsa-miR-9*	5	-0.416062	0.00300306	4.5335e-05
1230402	NM_002158.3	FOXN2	2	hsa-miR-9*	15	-0.416062	0.00300306	4.5335e-05
1230402	NM_002158.3	FOXN2	2	hsa-miR-98	X	-0.385009	0.00745151	0.000178973
1230463	NM_015134.2	M-RIP	17	hsa-miR-181b	1	0.406974	0.00271531	6.87207e-05
1230463	NM_015134.2	M-RIP	17	hsa-miR-181b	9	0.406974	0.00271531	6.87207e-05
1230463	NM_015134.2	M-RIP	17	hsa-miR-18b	X	0.389093	0.00368429	0.00015055
1230463	NM_015134.2	M-RIP	17	hsa-miR-363	X	0.355391	0.00835233	0.000587453
1230468	NM_138414.1	CCDC101	16	hsa-miR-9*	1	-0.370076	0.00963338	0.000330523
1230468	NM_138414.1	CCDC101	16	hsa-miR-9*	5	-0.370076	0.00963338	0.000330523
1230468	NM_138414.1	CCDC101	16	hsa-miR-9*	15	-0.370076	0.00963338	0.000330523
1230615	NM_001235.2	SERPINH1	11	hsa-miR-130a	11	0.424999	0.00595341	2.97611e-05
1230615	NM_001235.2	SERPINH1	11	hsa-miR-18b	X	0.437428	0.000713787	1.62452e-05
1230615	NM_001235.2	SERPINH1	11	hsa-miR-20b	X	0.448775	0.000490832	9.1524e-06
1230615	NM_001235.2	SERPINH1	11	hsa-miR-363	X	0.415704	0.00140723	4.60945e-05
1230632	NM_001066.2	TNFRSF1B	1	hsa-miR-181a	1	-0.394305	0.00410751	0.000120336
1230632	NM_001066.2	TNFRSF1B	1	hsa-miR-181a	9	-0.394305	0.00410751	0.000120336
1230632	NM_001066.2	TNFRSF1B	1	hsa-miR-181b	1	-0.447432	0.000723469	9.80607e-06
1230632	NM_001066.2	TNFRSF1B	1	hsa-miR-181b	9	-0.447432	0.000723469	9.80607e-06
1230632	NM_001066.2	TNFRSF1B	1	hsa-miR-181c	19	-0.421562	0.00199026	3.50393e-05
1230632	NM_001066.2	TNFRSF1B	1	hsa-miR-213	1	-0.410418	0.00342152	5.8781e-05
1240091	NM_025164.3	KIAA0999	11	hsa-miR-18b	X	-0.411401	0.00181228	5.61998e-05
1240091	NM_025164.3	KIAA0999	11	hsa-miR-20b	X	-0.405527	0.0022233	7.33457e-05
1240091	NM_025164.3	KIAA0999	11	hsa-miR-339	7	-0.470123	0.00101419	2.93692e-06
1240091	NM_025164.3	KIAA0999	11	hsa-miR-363	X	-0.484874	9.49e-05	1.27898e-06
1240091	NM_025164.3	KIAA0999	11	hsa-miR-9*	1	0.383971	0.00665728	0.000186949
1240091	NM_025164.3	KIAA0999	11	hsa-miR-9*	5	0.383971	0.00665728	0.000186949
1240091	NM_025164.3	KIAA0999	11	hsa-miR-9*	15	0.383971	0.00665728	0.000186949
1240291	NM_001001582.1	PDE9A	21	hsa-miR-181a	1	0.39959	0.00356256	9.55182e-05
1240291	NM_001001582.1	PDE9A	21	hsa-miR-181a	9	0.39959	0.00356256	9.55182e-05
1240291	NM_001001582.1	PDE9A	21	hsa-miR-181b	1	0.388025	0.00463184	0.000157549
1240291	NM_001001582.1	PDE9A	21	hsa-miR-181b	9	0.388025	0.00463184	0.000157549
1240291	NM_001001582.1	PDE9A	21	hsa-miR-181c	19	0.422624	0.00193974	3.33217e-05
1240504	NM_147686.1	TRAF3IP2	6	hsa-miR-339	7	0.409134	0.00503169	6.23189e-05
1240615	NM_001006658.1	CR2	1	hsa-miR-181a	1	0.393071	0.00428646	0.000126933
1240615	NM_001006658.1	CR2	1	hsa-miR-181a	9	0.393071	0.00428646	0.000126933
1240615	NM_001006658.1	CR2	1	hsa-miR-181b	1	0.449308	0.000683631	8.9045e-06
1240615	NM_001006658.1	CR2	1	hsa-miR-181b	9	0.449308	0.000683631	8.9045e-06
1240615	NM_001006658.1	CR2	1	hsa-miR-181c	19	0.459542	0.000548471	5.20848e-06
1240615	NM_001006658.1	CR2	1	hsa-miR-213	1	0.432684	0.00174635	2.05256e-05
1240754	NM_016817.2	OAS2	12	hsa-miR-181b	1	0.406597	0.00275035	6.98988e-05
1240754	NM_016817.2	OAS2	12	hsa-miR-181b	9	0.406597	0.00275035	6.98988e-05
1240754	NM_016817.2	OAS2	12	hsa-miR-181c	19	0.367046	0.00924823	0.000373004
1240754	NM_016817.2	OAS2	12	hsa-miR-18b	X	0.412382	0.0017701	5.37294e-05
1240754	NM_016817.2	OAS2	12	hsa-miR-20b	X	0.371853	0.0062816	0.000307726
1240754	NM_016817.2	OAS2	12	hsa-miR-339	7	0.398731	0.00658934	9.91985e-05
1240754	NM_016817.2	OAS2	12	hsa-miR-363	X	0.43631	0.000694381	1.71711e-05
1260053	NM_001221.2	CAMK2D	4	hsa-miR-221	X	0.522501	6.65e-05	1.27546e-07
1260053	NM_001221.2	CAMK2D	4	hsa-miR-222	X	0.501432	0.000157233	4.79753e-07
1260100	NM_005928.1	MFGE8	15	hsa-miR-10a	17	0.453447	0.000531182	7.18323e-06
1260100	NM_005928.1	MFGE8	15	hsa-miR-126*	9	0.503428	0.00216779	4.24772e-07
1260100	NM_005928.1	MFGE8	15	hsa-miR-181a	1	0.629081	6.06e-08	3.13639e-11
1260100	NM_005928.1	MFGE8	15	hsa-miR-181a	9	0.629081	6.06e-08	3.13639e-11
1260100	NM_005928.1	MFGE8	15	hsa-miR-181b	1	0.563669	6.25e-06	7.27615e-09
1260100	NM_005928.1	MFGE8	15	hsa-miR-181b	9	0.563669	6.25e-06	7.27615e-09
1260100	NM_005928.1	MFGE8	15	hsa-miR-181c	19	0.605084	5.88e-07	2.67156e-10
1260100	NM_005928.1	MFGE8	15	hsa-miR-18b	X	0.373042	0.00562035	0.000293291
1260100	NM_005928.1	MFGE8	15	hsa-miR-194	1	0.401386	0.00878961	8.82293e-05
1260100	NM_005928.1	MFGE8	15	hsa-miR-194	11	0.401386	0.00878961	8.82293e-05
1260100	NM_005928.1	MFGE8	15	hsa-miR-20b	X	0.395484	0.00308396	0.000114331
1260100	NM_005928.1	MFGE8	15	hsa-miR-213	1	0.499286	0.000175776	5.46361e-07
1260100	NM_005928.1	MFGE8	15	hsa-miR-30a-5p	6	0.553601	7.57e-05	1.51953e-08
1260100	NM_005928.1	MFGE8	15	hsa-miR-30b	8	0.423533	0.00732597	3.19144e-05
1260100	NM_005928.1	MFGE8	15	hsa-miR-363	X	0.38677	0.00348496	0.000166159
1260228	NM_021105.1	PLSCR1	3	hsa-miR-10a	17	0.403558	0.0029354	8.01048e-05
1260228	NM_021105.1	PLSCR1	3	hsa-miR-181a	1	0.365084	0.00922789	0.000403129
1260228	NM_021105.1	PLSCR1	3	hsa-miR-181a	9	0.365084	0.00922789	0.000403129
1260228	NM_021105.1	PLSCR1	3	hsa-miR-181b	1	0.454949	0.000531388	6.63994e-06
1260228	NM_021105.1	PLSCR1	3	hsa-miR-181b	9	0.454949	0.000531388	6.63994e-06
1260228	NM_021105.1	PLSCR1	3	hsa-miR-181c	19	0.389123	0.00519987	0.000150358
1260228	NM_021105.1	PLSCR1	3	hsa-miR-221	X	0.394261	0.00511717	0.000120566
1260228	NM_021105.1	PLSCR1	3	hsa-miR-222	X	0.415421	0.00310134	4.67032e-05
1260332	NM_005715.1	UST	6	hsa-miR-151	8	0.489221	0.000799526	9.93618e-07
1260427	NM_174938.3	FRMD3	9	hsa-miR-222	X	0.410275	0.00366546	5.91656e-05
1260427	NM_174938.3	FRMD3	9	hsa-miR-339	7	0.440546	0.00221623	1.39038e-05
1260470	NM_031490.2	LONP2	16	hsa-miR-181b	1	-0.37208	0.00713678	0.000304921
1260470	NM_031490.2	LONP2	16	hsa-miR-181b	9	-0.37208	0.00713678	0.000304921
1260470	NM_031490.2	LONP2	16	hsa-miR-30b	8	-0.414963	0.00822959	4.77042e-05
1260470	NM_031490.2	LONP2	16	hsa-miR-363	X	-0.355968	0.00826385	0.000574621
1260551	NM_021219.2	JAM2	21	hsa-miR-151	8	0.485714	0.000799526	1.21841e-06
1260551	NM_021219.2	JAM2	21	hsa-miR-192	11	-0.476631	0.00130316	2.04494e-06
1260551	NM_021219.2	JAM2	21	hsa-miR-194	1	-0.467667	0.00130505	3.36038e-06
1260551	NM_021219.2	JAM2	21	hsa-miR-194	11	-0.467667	0.00130505	3.36038e-06
1260551	NM_021219.2	JAM2	21	hsa-miR-363	X	-0.375501	0.0048434	0.000265394
1260682	NM_002138.3	HNRPD	4	hsa-miR-551a	1	-0.449844	0.00657576	8.66158e-06
1260731	NM_198468.2	C6orf167	6	hsa-miR-331	12	-0.374092	0.00984691	0.000281064
1260768	NM_001032292.1	ZNF174	16	hsa-miR-486	8	0.390476	0.00992472	0.000141914
1300072	NM_015194.1	MYO1D	17	hsa-miR-181a	1	-0.377957	0.00662364	0.000239989
1300072	NM_015194.1	MYO1D	17	hsa-miR-181a	9	-0.377957	0.00662364	0.000239989
1300072	NM_015194.1	MYO1D	17	hsa-miR-181b	1	-0.369899	0.00764832	0.000332876
1300072	NM_015194.1	MYO1D	17	hsa-miR-181b	9	-0.369899	0.00764832	0.000332876
1300072	NM_015194.1	MYO1D	17	hsa-miR-221	X	-0.42172	0.00237698	3.47786e-05
1300072	NM_015194.1	MYO1D	17	hsa-miR-222	X	-0.453992	0.000854592	6.98144e-06
1300095	NM_000129.3	F13A1	6	hsa-miR-10a	17	0.463209	0.000360773	4.27973e-06
1300095	NM_000129.3	F13A1	6	hsa-miR-181b	1	0.367495	0.00808422	0.000366408
1300095	NM_000129.3	F13A1	6	hsa-miR-181b	9	0.367495	0.00808422	0.000366408
1300095	NM_000129.3	F13A1	6	hsa-miR-18b	X	0.380763	0.00461376	0.000213719
1300095	NM_000129.3	F13A1	6	hsa-miR-192	11	0.427628	0.0047815	2.62355e-05
1300095	NM_000129.3	F13A1	6	hsa-miR-20b	X	0.38196	0.00467758	0.000203341
1300095	NM_000129.3	F13A1	6	hsa-miR-363	X	0.44663	0.000465027	1.02171e-05
1300095	NM_000129.3	F13A1	6	hsa-miR-486	8	0.416949	0.00569697	4.35033e-05
1300112	NM_145061.3	C13orf3	13	hsa-miR-331	12	-0.435829	0.00173911	1.75845e-05
1300112	NM_145061.3	C13orf3	13	hsa-miR-9	1	-0.424334	0.00303141	3.07205e-05
1300112	NM_145061.3	C13orf3	13	hsa-miR-9	5	-0.424334	0.00303141	3.07205e-05
1300112	NM_145061.3	C13orf3	13	hsa-miR-9	15	-0.424334	0.00303141	3.07205e-05
1300112	NM_145061.3	C13orf3	13	hsa-miR-9*	1	-0.410255	0.00354234	5.92196e-05
1300112	NM_145061.3	C13orf3	13	hsa-miR-9*	5	-0.410255	0.00354234	5.92196e-05
1300112	NM_145061.3	C13orf3	13	hsa-miR-9*	15	-0.410255	0.00354234	5.92196e-05
1300129	NM_005713.1	COL4A3BP	5	hsa-miR-10a	17	0.488595	0.000145218	1.03063e-06
1300129	NM_005713.1	COL4A3BP	5	hsa-miR-130a	11	0.407647	0.00915038	6.66633e-05
1300129	NM_005713.1	COL4A3BP	5	hsa-miR-18b	X	0.386328	0.00391389	0.000169293
1300129	NM_005713.1	COL4A3BP	5	hsa-miR-20b	X	0.356755	0.00931776	0.000557534
1300129	NM_005713.1	COL4A3BP	5	hsa-miR-486	8	0.434679	0.00355413	1.86109e-05
1300139	NM_015885.2	PCF11	11	hsa-miR-9	1	-0.413361	0.00378047	5.13651e-05
1300139	NM_015885.2	PCF11	11	hsa-miR-9	5	-0.413361	0.00378047	5.13651e-05
1300139	NM_015885.2	PCF11	11	hsa-miR-9	15	-0.413361	0.00378047	5.13651e-05
1300139	NM_015885.2	PCF11	11	hsa-miR-9*	1	-0.441412	0.0015941	1.3312e-05
1300139	NM_015885.2	PCF11	11	hsa-miR-9*	5	-0.441412	0.0015941	1.3312e-05
1300139	NM_015885.2	PCF11	11	hsa-miR-9*	15	-0.441412	0.0015941	1.3312e-05
1300139	NM_015885.2	PCF11	11	hsa-miR-98	X	-0.429692	0.00306917	2.37455e-05
1300170	NM_001669.2	ARSD	X	hsa-miR-181a	1	0.475511	0.000244597	2.17754e-06
1300170	NM_001669.2	ARSD	X	hsa-miR-181a	9	0.475511	0.000244597	2.17754e-06
1300170	NM_001669.2	ARSD	X	hsa-miR-181b	1	0.526594	2.91e-05	9.75707e-08
1300170	NM_001669.2	ARSD	X	hsa-miR-181b	9	0.526594	2.91e-05	9.75707e-08
1300170	NM_001669.2	ARSD	X	hsa-miR-181c	19	0.5162	5.27e-05	1.91345e-07
1300170	NM_001669.2	ARSD	X	hsa-miR-213	1	0.488321	0.000250722	1.04723e-06
1300170	NM_001669.2	ARSD	X	hsa-miR-221	X	0.447732	0.000934977	9.65636e-06
1300170	NM_001669.2	ARSD	X	hsa-miR-222	X	0.473295	0.000417268	2.46417e-06
1300170	NM_001669.2	ARSD	X	hsa-miR-30a-5p	6	0.411246	0.00849258	5.65997e-05
1300170	NM_001669.2	ARSD	X	hsa-miR-30d	8	0.462907	0.00550668	4.34989e-06
1300170	NM_001669.2	ARSD	X	hsa-miR-551b	3	-0.450084	0.00425118	8.55484e-06
1300204	NM_003447.2	ZNF165	6	hsa-miR-192	11	-0.400044	0.0085998	9.36247e-05
1300246	NM_001031685.2	TP53BP2	1	hsa-miR-181a	1	0.365215	0.00922429	0.00040105
1300246	NM_001031685.2	TP53BP2	1	hsa-miR-181a	9	0.365215	0.00922429	0.00040105
1300246	NM_001031685.2	TP53BP2	1	hsa-miR-213	1	0.39202	0.00555817	0.000132815
1300441	NM_000179.1	MSH6	2	hsa-miR-331	12	-0.544601	0.000136524	2.87586e-08
1300441	NM_000179.1	MSH6	2	hsa-miR-33b	17	0.417525	0.00663674	4.2351e-05
1300441	NM_000179.1	MSH6	2	hsa-miR-98	X	-0.472399	0.00125079	2.58987e-06
1300445	NM_016229.3	CYB5R2	11	hsa-miR-181a	1	-0.418045	0.0019573	4.13352e-05
1300445	NM_016229.3	CYB5R2	11	hsa-miR-181a	9	-0.418045	0.0019573	4.13352e-05
1300445	NM_016229.3	CYB5R2	11	hsa-miR-181b	1	-0.428425	0.00141858	2.52464e-05
1300445	NM_016229.3	CYB5R2	11	hsa-miR-181b	9	-0.428425	0.00141858	2.52464e-05
1300445	NM_016229.3	CYB5R2	11	hsa-miR-181c	19	-0.40756	0.00305968	6.6926e-05
1300445	NM_016229.3	CYB5R2	11	hsa-miR-213	1	-0.387699	0.00637646	0.000159745
1300603	NM_016293.2	BIN2	12	hsa-miR-625	14	0.43388	0.0057248	1.93567e-05
1300670	NM_014575.2	SCHIP1	3	hsa-miR-10a	17	0.432374	0.00108439	2.08392e-05
1300670	NM_014575.2	SCHIP1	3	hsa-miR-181a	1	0.408176	0.00271411	6.50865e-05
1300670	NM_014575.2	SCHIP1	3	hsa-miR-181a	9	0.408176	0.00271411	6.50865e-05
1300670	NM_014575.2	SCHIP1	3	hsa-miR-181b	1	0.442929	0.000843871	1.23319e-05
1300670	NM_014575.2	SCHIP1	3	hsa-miR-181b	9	0.442929	0.000843871	1.23319e-05
1300670	NM_014575.2	SCHIP1	3	hsa-miR-181c	19	0.451047	0.000701216	8.13883e-06
1300670	NM_014575.2	SCHIP1	3	hsa-miR-18b	X	0.421805	0.00126091	3.46391e-05
1300670	NM_014575.2	SCHIP1	3	hsa-miR-20b	X	0.399518	0.0027225	9.58218e-05
1300670	NM_014575.2	SCHIP1	3	hsa-miR-213	1	0.417703	0.0027025	4.20007e-05
1300670	NM_014575.2	SCHIP1	3	hsa-miR-363	X	0.389034	0.0032269	0.000150929
1300743	NM_198057.2	TSC22D3	X	hsa-miR-10a	17	0.420778	0.00162177	3.63598e-05
1300743	NM_198057.2	TSC22D3	X	hsa-miR-18b	X	0.379448	0.00473123	0.000225681
1300743	NM_198057.2	TSC22D3	X	hsa-miR-192	11	0.409093	0.00736006	6.24351e-05
1300743	NM_198057.2	TSC22D3	X	hsa-miR-194	1	0.403553	0.00826587	8.01226e-05
1300743	NM_198057.2	TSC22D3	X	hsa-miR-194	11	0.403553	0.00826587	8.01226e-05
1300743	NM_198057.2	TSC22D3	X	hsa-miR-215	1	0.454578	0.0056801	6.77042e-06
1300743	NM_198057.2	TSC22D3	X	hsa-miR-363	X	0.381981	0.00395141	0.000203164
1300743	NM_198057.2	TSC22D3	X	hsa-miR-486	8	0.389581	0.00999874	0.000147449
1300768	NM_006066.2	AKR1A1	1	hsa-miR-485-5p	14	0.495582	0.00732216	6.82389e-07
1300768	NM_006066.2	AKR1A1	1	hsa-miR-98	X	0.40008	0.00558693	9.34761e-05
1340017	NM_020798.1	USP35	11	hsa-miR-9	1	0.44148	0.00178603	1.32666e-05
1340017	NM_020798.1	USP35	11	hsa-miR-9	5	0.44148	0.00178603	1.32666e-05
1340017	NM_020798.1	USP35	11	hsa-miR-9	15	0.44148	0.00178603	1.32666e-05
1340017	NM_020798.1	USP35	11	hsa-miR-9*	1	0.470436	0.000644366	2.88672e-06
1340017	NM_020798.1	USP35	11	hsa-miR-9*	5	0.470436	0.000644366	2.88672e-06
1340017	NM_020798.1	USP35	11	hsa-miR-9*	15	0.470436	0.000644366	2.88672e-06
1340086	NM_001020820.1	MYADM	19	hsa-miR-181b	1	0.400282	0.00332664	9.2646e-05
1340086	NM_001020820.1	MYADM	19	hsa-miR-181b	9	0.400282	0.00332664	9.2646e-05
1340086	NM_001020820.1	MYADM	19	hsa-miR-18b	X	0.376763	0.00508778	0.000252046
1340086	NM_001020820.1	MYADM	19	hsa-miR-221	X	0.374709	0.00857181	0.0002741
1340086	NM_001020820.1	MYADM	19	hsa-miR-222	X	0.386041	0.00716456	0.000171357
1340086	NM_001020820.1	MYADM	19	hsa-miR-339	7	0.417604	0.00383266	4.21952e-05
1340121	NM_013975.2	LIG3	17	hsa-miR-9*	1	-0.377674	0.00776944	0.000242798
1340121	NM_013975.2	LIG3	17	hsa-miR-9*	5	-0.377674	0.00776944	0.000242798
1340121	NM_013975.2	LIG3	17	hsa-miR-9*	15	-0.377674	0.00776944	0.000242798
1340128	NM_198576.2	AGRN	1	hsa-miR-363	X	0.388565	0.00328408	0.000153974
1340154	XM_294581.3	LOC347292	9	hsa-miR-10a	17	-0.457464	0.000454111	5.8158e-06
1340167	NM_004725.2	BUB3	10	hsa-miR-181a	1	-0.458479	0.000479619	5.51128e-06
1340167	NM_004725.2	BUB3	10	hsa-miR-181a	9	-0.458479	0.000479619	5.51128e-06
1340167	NM_004725.2	BUB3	10	hsa-miR-181b	1	-0.376756	0.00628191	0.000252118
1340167	NM_004725.2	BUB3	10	hsa-miR-181b	9	-0.376756	0.00628191	0.000252118
1340167	NM_004725.2	BUB3	10	hsa-miR-181c	19	-0.376996	0.00715793	0.00024965
1340167	NM_004725.2	BUB3	10	hsa-miR-18b	X	-0.378639	0.00483347	0.000233344
1340167	NM_004725.2	BUB3	10	hsa-miR-20b	X	-0.374	0.00593255	0.000282116
1340167	NM_004725.2	BUB3	10	hsa-miR-213	1	-0.456885	0.000792839	5.99653e-06
1340167	NM_004725.2	BUB3	10	hsa-miR-221	X	-0.385781	0.00645259	0.000173247
1340167	NM_004725.2	BUB3	10	hsa-miR-222	X	-0.415559	0.00310134	4.64054e-05
1340167	NM_004725.2	BUB3	10	hsa-miR-363	X	-0.411169	0.00162313	5.67993e-05
1340255	NM_003621.1	PPFIBP2	11	hsa-miR-181b	1	-0.362267	0.0093869	0.000450298
1340255	NM_003621.1	PPFIBP2	11	hsa-miR-181b	9	-0.362267	0.0093869	0.000450298
1340255	NM_003621.1	PPFIBP2	11	hsa-miR-213	1	-0.407474	0.00365966	6.71866e-05
1340274	NM_016309.2	LCMT1	16	hsa-miR-221	X	-0.385229	0.00654051	0.000177324
1340376	XM_926558.1	LOC642453	17	hsa-miR-10a	17	-0.466601	0.000313873	3.56153e-06
1340376	XM_926558.1	LOC642453	17	hsa-miR-18b	X	-0.378738	0.00483347	0.000232393
1340376	XM_926558.1	LOC642453	17	hsa-miR-363	X	-0.353506	0.00870877	0.000631219
1340376	XM_926558.1	LOC642453	17	hsa-miR-486	8	-0.405622	0.00725653	7.30334e-05
1340441	NM_003472.3	DEK	6	hsa-miR-98	X	-0.493826	0.000728924	7.57549e-07
1340577	NM_203390.2	RBM12B	8	hsa-miR-98	X	-0.440393	0.00230064	1.40109e-05
1340609	NM_031934.3	RAB34	17	hsa-miR-222	X	0.37855	0.00869003	0.000234201
1340619	NM_015414.3	RPL36	19	hsa-miR-181a	1	-0.395425	0.0040265	0.000114625
1340619	NM_015414.3	RPL36	19	hsa-miR-181a	9	-0.395425	0.0040265	0.000114625
1340619	NM_015414.3	RPL36	19	hsa-miR-181b	1	-0.434006	0.00117964	1.92373e-05
1340619	NM_015414.3	RPL36	19	hsa-miR-181b	9	-0.434006	0.00117964	1.92373e-05
1340619	NM_015414.3	RPL36	19	hsa-miR-181c	19	-0.409346	0.00287198	6.17214e-05
1340619	NM_015414.3	RPL36	19	hsa-miR-213	1	-0.383163	0.00730351	0.000193383
1340619	NM_015414.3	RPL36	19	hsa-miR-221	X	-0.387188	0.00616799	0.000163244
1340619	NM_015414.3	RPL36	19	hsa-miR-222	X	-0.3813	0.00816735	0.000209004
1340747	XM_927957.1	LOC644865	5	hsa-miR-10a	17	0.382936	0.00508998	0.000195227
1340747	XM_927957.1	LOC644865	5	hsa-miR-18b	X	0.378491	0.00484005	0.000234771
1400019	BF663883		2	hsa-miR-339	7	0.385955	0.00871899	0.00017198
1400019	BF663883		2	hsa-miR-34b	11	-0.460884	0.00541292	4.84853e-06
1400019	BF663883		2	hsa-miR-363	X	0.382689	0.00387916	0.000197252
1400019	BF663883		2	hsa-miR-424	X	-0.488509	0.00258129	1.03581e-06
1400019	BF663883		2	hsa-miR-9	1	-0.430114	0.00241198	2.32643e-05
1400019	BF663883		2	hsa-miR-9	5	-0.430114	0.00241198	2.32643e-05
1400019	BF663883		2	hsa-miR-9	15	-0.430114	0.00241198	2.32643e-05
1400019	BF663883		2	hsa-miR-9*	1	-0.461136	0.000857582	4.78361e-06
1400019	BF663883		2	hsa-miR-9*	5	-0.461136	0.000857582	4.78361e-06
1400019	BF663883		2	hsa-miR-9*	15	-0.461136	0.000857582	4.78361e-06
1400025	NM_005624.2	CCL25	19	hsa-miR-221	X	0.489005	0.000217516	1.00624e-06
1400025	NM_005624.2	CCL25	19	hsa-miR-222	X	0.467887	0.000502372	3.32022e-06
1400025	NM_005624.2	CCL25	19	hsa-miR-339	7	0.41111	0.00477537	5.69527e-05
1400025	NM_005624.2	CCL25	19	hsa-miR-9	1	-0.442048	0.00176196	1.28925e-05
1400025	NM_005624.2	CCL25	19	hsa-miR-9	5	-0.442048	0.00176196	1.28925e-05
1400025	NM_005624.2	CCL25	19	hsa-miR-9	15	-0.442048	0.00176196	1.28925e-05
1400025	NM_005624.2	CCL25	19	hsa-miR-9*	1	-0.415663	0.00300306	4.61822e-05
1400025	NM_005624.2	CCL25	19	hsa-miR-9*	5	-0.415663	0.00300306	4.61822e-05
1400025	NM_005624.2	CCL25	19	hsa-miR-9*	15	-0.415663	0.00300306	4.61822e-05
1400079	NM_020731.3	AHRR	5	hsa-miR-181a	1	-0.390008	0.00474096	0.000144783
1400079	NM_020731.3	AHRR	5	hsa-miR-181a	9	-0.390008	0.00474096	0.000144783
1400243	NM_001012994.1	SNX30	9	hsa-miR-33b	17	0.392748	0.00994821	0.000128715
1400278	CD639781		1	hsa-miR-10a	17	-0.442614	0.000765389	1.25297e-05
1400278	CD639781		1	hsa-miR-151	8	0.484282	0.000799526	1.32336e-06
1400278	CD639781		1	hsa-miR-18b	X	-0.470239	0.000201729	2.91822e-06
1400278	CD639781		1	hsa-miR-20b	X	-0.362871	0.0082014	0.000439778
1400278	CD639781		1	hsa-miR-30a-5p	6	-0.409204	0.00915401	6.2121e-05
1400278	CD639781		1	hsa-miR-363	X	-0.398533	0.00242162	0.000100065
1400324	NM_005591.3	MRE11A	11	hsa-miR-30d	8	-0.430788	0.00884563	2.25148e-05
1400482	NM_019886.2	CHST7	X	hsa-miR-193a	17	-0.527677	0.00102834	9.08398e-08
1400598	NM_001079880.1	PRKD2	19	hsa-miR-221	X	0.374986	0.00857181	0.000271026
1400685	NM_017915.2	C12orf48	12	HS_188	12	0.436933	0.00998482	1.66492e-05
1400685	NM_017915.2	C12orf48	12	HS_287	16	0.474838	0.00828077	2.26108e-06
1410121	NM_022068.1	FAM38B	18	hsa-miR-10a	17	-0.436276	0.000953921	1.72e-05
1410121	NM_022068.1	FAM38B	18	hsa-miR-130b	22	-0.430291	0.00541621	2.30653e-05
1410121	NM_022068.1	FAM38B	18	hsa-miR-138	3	0.456992	0.00469663	5.96274e-06
1410121	NM_022068.1	FAM38B	18	hsa-miR-138	16	0.456992	0.00469663	5.96274e-06
1410121	NM_022068.1	FAM38B	18	hsa-miR-18b	X	-0.44622	0.00052469	1.04334e-05
1410121	NM_022068.1	FAM38B	18	hsa-miR-20b	X	-0.364509	0.00780266	0.000412372
1410121	NM_022068.1	FAM38B	18	hsa-miR-222	X	-0.417691	0.0029244	4.20242e-05
1410121	NM_022068.1	FAM38B	18	hsa-miR-34b	11	0.433076	0.00924299	2.01354e-05
1410121	NM_022068.1	FAM38B	18	hsa-miR-363	X	-0.446704	0.000465027	1.01785e-05
1410189	NM_000610.3	CD44	11	hsa-miR-18b	X	-0.359756	0.00807472	0.000496556
1410189	NM_000610.3	CD44	11	hsa-miR-20b	X	-0.358722	0.00889987	0.000516839
1410189	NM_000610.3	CD44	11	hsa-miR-363	X	-0.439905	0.000609508	1.43577e-05
1410215	NM_012106.3	ARL2BP	16	HS_219	15	0.498345	0.00651478	5.78251e-07
1410215	NM_012106.3	ARL2BP	16	hsa-miR-9	1	0.432822	0.00232773	2.03875e-05
1410215	NM_012106.3	ARL2BP	16	hsa-miR-9	5	0.432822	0.00232773	2.03875e-05
1410215	NM_012106.3	ARL2BP	16	hsa-miR-9	15	0.432822	0.00232773	2.03875e-05
1410215	NM_012106.3	ARL2BP	16	hsa-miR-9*	1	0.426901	0.00234579	2.71693e-05
1410215	NM_012106.3	ARL2BP	16	hsa-miR-9*	5	0.426901	0.00234579	2.71693e-05
1410215	NM_012106.3	ARL2BP	16	hsa-miR-9*	15	0.426901	0.00234579	2.71693e-05
1410288	NM_006044.2	HDAC6	X	hsa-miR-10a	17	0.367709	0.0077143	0.000363302
1410288	NM_006044.2	HDAC6	X	hsa-miR-18b	X	0.462512	0.000270331	4.44329e-06
1410288	NM_006044.2	HDAC6	X	hsa-miR-20b	X	0.432898	0.000885043	2.03117e-05
1410288	NM_006044.2	HDAC6	X	hsa-miR-363	X	0.463161	0.000236795	4.29081e-06
1410307	NM_024330.1	SLC27A3	1	hsa-miR-10a	17	0.393951	0.00382932	0.000122195
1410307	NM_024330.1	SLC27A3	1	hsa-miR-18b	X	0.448806	0.000467635	9.13781e-06
1410307	NM_024330.1	SLC27A3	1	hsa-miR-20b	X	0.380562	0.00482968	0.000215508
1410307	NM_024330.1	SLC27A3	1	hsa-miR-339	7	0.396763	0.00675125	0.000108132
1410307	NM_024330.1	SLC27A3	1	hsa-miR-363	X	0.441187	0.00058481	1.34635e-05
1410326	NM_016066.3	GLRX2	1	hsa-miR-181b	1	-0.369216	0.0077431	0.000342104
1410326	NM_016066.3	GLRX2	1	hsa-miR-181b	9	-0.369216	0.0077431	0.000342104
1410326	NM_016066.3	GLRX2	1	hsa-miR-181c	19	-0.394653	0.00437366	0.000118534
1410347	NM_002745.4	MAPK1	22	hsa-miR-339	7	0.38122	0.00942569	0.0002097
1410347	NM_002745.4	MAPK1	22	hsa-miR-551b	3	-0.457311	0.00356095	5.86306e-06
1410600	NM_006123.2	IDS	X	hsa-miR-103	5	0.493185	0.00786228	7.86887e-07
1410600	NM_006123.2	IDS	X	hsa-miR-103	20	0.493185	0.00786228	7.86887e-07
1410600	NM_006123.2	IDS	X	hsa-miR-138	3	-0.434273	0.00830835	1.89864e-05
1410600	NM_006123.2	IDS	X	hsa-miR-138	16	-0.434273	0.00830835	1.89864e-05
1410647	NM_018641.3	CHST12	7	hsa-miR-18b	X	0.384303	0.0041554	0.000184363
1410647	NM_018641.3	CHST12	7	hsa-miR-221	X	0.416509	0.00276626	4.44031e-05
1410647	NM_018641.3	CHST12	7	hsa-miR-222	X	0.420893	0.00273109	3.61633e-05
1410707	NM_001379.1	DNMT1	19	hsa-miR-331	12	-0.503303	0.000245303	4.28032e-07
1410707	NM_001379.1	DNMT1	19	hsa-miR-98	X	-0.428499	0.00315739	2.51564e-05
1430161	NM_003874.1	CD84	1	hsa-miR-221	X	-0.480222	0.000292768	1.66932e-06
1430161	NM_003874.1	CD84	1	hsa-miR-222	X	-0.478901	0.00033736	1.7992e-06
1430161	NM_003874.1	CD84	1	hsa-miR-98	X	0.394139	0.00624783	0.000121205
1430168	NM_006612.4	KIF1C	17	hsa-miR-33b	17	-0.39879	0.00916141	9.89416e-05
1430168	NM_006612.4	KIF1C	17	hsa-miR-98	X	0.519139	0.000228806	1.58525e-07
1430196	NM_004013.1	DMD	X	hsa-miR-192	11	0.418714	0.00567906	4.00618e-05
1430196	NM_004013.1	DMD	X	hsa-miR-194	1	0.396365	0.00971602	0.000110027
1430196	NM_004013.1	DMD	X	hsa-miR-194	11	0.396365	0.00971602	0.000110027
1430196	NM_004013.1	DMD	X	hsa-miR-486	8	0.448064	0.00216863	9.49319e-06
1430392	NM_015327.1	SMG5	1	hsa-miR-181a	1	0.389753	0.00475175	0.00014637
1430392	NM_015327.1	SMG5	1	hsa-miR-181a	9	0.389753	0.00475175	0.00014637
1430392	NM_015327.1	SMG5	1	hsa-miR-20b	X	0.381606	0.00472307	0.000206361
1430451	NM_004629.1	FANCG	9	hsa-miR-331	12	-0.419464	0.00277596	3.86777e-05
1430451	NM_004629.1	FANCG	9	hsa-miR-9*	1	-0.389865	0.00592728	0.000145671
1430451	NM_004629.1	FANCG	9	hsa-miR-9*	5	-0.389865	0.00592728	0.000145671
1430451	NM_004629.1	FANCG	9	hsa-miR-9*	15	-0.389865	0.00592728	0.000145671
1430538	NM_002661.2	PLCG2	16	hsa-miR-181a	1	-0.55159	7.46e-06	1.7552e-08
1430538	NM_002661.2	PLCG2	16	hsa-miR-181a	9	-0.55159	7.46e-06	1.7552e-08
1430538	NM_002661.2	PLCG2	16	hsa-miR-181b	1	-0.521937	3.57e-05	1.32306e-07
1430538	NM_002661.2	PLCG2	16	hsa-miR-181b	9	-0.521937	3.57e-05	1.32306e-07
1430538	NM_002661.2	PLCG2	16	hsa-miR-181c	19	-0.554335	1.23e-05	1.44128e-08
1430538	NM_002661.2	PLCG2	16	hsa-miR-18b	X	-0.352909	0.00975253	0.00064569
1430538	NM_002661.2	PLCG2	16	hsa-miR-20b	X	-0.418024	0.00148223	4.13758e-05
[truncated: 7,454 more rows]
