# Supplementary material for: Genome-Wide Transcriptional Profiling Reveals MicroRNA-Correlated Genes and Biological Processes in Human Lymphoblastoid Cell Lines
Source: PLoS One. 2009 Jun 11;4(6):e5878. doi: 10.1371/journal.pone.0005878 (PMC2691578; doi:10.1371/journal.pone.0005878)
Supplement: Table S3 — Excel spreadsheet listing gene ontology analysis of miRNA-correlated genes. (0.06 MB XLS) [file pone.0005878.s003.xls]

## Sheet: miRNA-correlated pathways
miRNAs	GO CATEGORY	TOTAL GENES	CHANGED GENES	ENRICHMENT	LOG10(p)	FALSE DISCOVERY RATE
miR-33b	GO:0007067_mitosis	146	12	6.33351	-6.45726	0
miR-33b	GO:0000279_M_phase	176	13	5.69176	-6.41891	0
miR-33b	GO:0000087_M_phase_of_mitotic_cell_cycle	148	12	6.24792	-6.39288	0
miR-33b	GO:0007049_cell_cycle	574	23	3.08768	-6.07914	0
miR-33b	GO:0022403_cell_cycle_phase	214	13	4.68107	-5.45641	0
miR-33b	GO:0051301_cell_division	163	11	5.20021	-5.11542	0.000333
miR-33b	GO:0000278_mitotic_cell_cycle	201	12	4.60046	-4.99148	0.000571
miR-33b	GO:0022402_cell_cycle_process	489	19	2.99406	-4.85915	0.00075
miR-33b	GO:0007088_regulation_of_mitosis	44	6	10.5079	-4.70875	0.001
miR-33b	GO:0005524_ATP_binding	803	24	2.30309	-4.15145	0.0074
miR-221	GO:0007165_signal_transduction	1430	70	1.61016	-5.02681	0.004
miR-221	GO:0007154_cell_communication	1553	74	1.56735	-4.91189	0.0045
miR-181c	GO:0016020_membrane	2494	131	1.46161	-6.8706	0
miR-181c	GO:0044425_membrane_part	1977	102	1.43566	-4.66476	0.01
miR-222	GO:0007165_signal_transduction	1430	71	1.70777	-6.15066	0
miR-222	GO:0007154_cell_communication	1553	75	1.66111	-6.05914	0.0005
miR-222	GO:0007166_cell_surface_receptor_linked_signal_transduction	469	31	2.27351	-4.94063	0.004333
All miRNAs	GO:0051301_cell_division	163	64	1.79522	-6.54992	0
All miRNAs	GO:0000278_mitotic_cell_cycle	201	75	1.70605	-6.50736	0
All miRNAs	GO:0022403_cell_cycle_phase	214	75	1.60241	-5.30483	0.001
All miRNAs	GO:0007049_cell_cycle	574	169	1.34617	-5.26085	0.00075
All miRNAs	GO:0022402_cell_cycle_process	489	147	1.37447	-5.15642	0.0006
All miRNAs	GO:0006260_DNA_replication	142	53	1.70653	-4.7765	0.001
All miRNAs	GO:0051325_interphase	58	27	2.12844	-4.60894	0.002286
All miRNAs	GO:0007154_cell_communication	1553	398	1.17176	-4.48936	0.00275
All miRNAs	GO:0051329_interphase_of_mitotic_cell_cycle	57	26	2.08556	-4.2702	0.004
All miRNAs	GO:0007165_signal_transduction	1430	366	1.17023	-4.05465	0.0045
All miRNAs	GO:0050896_response_to_stimulus	1024	270	1.20556	-3.92255	0.008182
All miRs without miRs-331,-33b,-98	GO:0007154_cell_communication	1553	364	1.21329	-5.62008	0
All miRs without miRs-331,-33b,-98	GO:0007165_signal_transduction	1430	337	1.21991	-5.39834	0
miR-98	GO:0000278_mitotic_cell_cycle	201	23	4.53429	-9.07302	0
miR-98	GO:0007049_cell_cycle	574	40	2.76138	-8.78813	0
miR-98	GO:0007059_chromosome_segregation	40	11	10.8971	-8.62887	0
miR-98	GO:0022403_cell_cycle_phase	214	23	4.25884	-8.53323	0
miR-98	GO:0007067_mitosis	146	19	5.15677	-8.49308	0
miR-98	GO:0000087_M_phase_of_mitotic_cell_cycle	148	19	5.08709	-8.39226	0
miR-98	GO:0000279_M_phase	176	20	4.50292	-7.87999	0
miR-98	GO:0022402_cell_cycle_process	489	34	2.75516	-7.42248	0
miR-98	GO:0006260_DNA_replication	142	17	4.74393	-7.09491	0
miR-98	GO:0007088_regulation_of_mitosis	44	10	9.00585	-7.0213	0
miR-98	GO:0051301_cell_division	163	18	4.37585	-6.93891	0
miR-98	GO:0006259_DNA_metabolic_process	489	33	2.67413	-6.89428	0
miR-98	GO:0000070_mitotic_sister_chromatid_segregation	17	6	13.9856	-5.63352	0
miR-98	GO:0000819_sister_chromatid_segregation	18	6	13.2086	-5.46657	0.000143
miR-98	GO:0051726_regulation_of_cell_cycle	365	24	2.60553	-4.88502	0.000333
miR-98	GO:0000074_regulation_of_progression_through_cell_cycle	361	23	2.52463	-4.47779	0.000562
miR-98	GO:0007051_spindle_organization_and_biogenesis	18	5	11.0071	-4.19819	0.001722
miR-98	GO:0051656_establishment_of_organelle_localization	18	5	11.0071	-4.19819	0.001722
miR-98	GO:0007017_microtubule-based_process	114	11	3.82354	-3.88686	0.003
miR-98	GO:0008283_cell_proliferation	369	22	2.36251	-3.87207	0.0029
miR-98	GO:0051640_organelle_localization	21	5	9.4347	-3.84923	0.002905
miR-98	GO:0045840_positive_regulation_of_mitosis	5	3	23.7754	-3.8177	0.0035
miR-98	GO:0050000_chromosome_localization	5	3	23.7754	-3.8177	0.0035
miR-98	GO:0051303_establishment_of_chromosome_localization	5	3	23.7754	-3.8177	0.0035
miR-98	GO:0006139_nucleobase__nucleoside__nucleotide_and_nucleic_acid_metabolic_process	2129	75	1.39593	-3.44331	0.00968
miR-331	GO:0006260_DNA_replication	142	34	8.67606	-22.5773	0
miR-331	GO:0006259_DNA_metabolic_process	489	56	4.14964	-20.6317	0
miR-331	GO:0007049_cell_cycle	574	58	3.66141	-18.7131	0
miR-331	GO:0022402_cell_cycle_process	489	49	3.63094	-15.417	0
miR-331	GO:0022403_cell_cycle_phase	214	31	5.24904	-13.9323	0
miR-331	GO:0000278_mitotic_cell_cycle	201	30	5.40825	-13.8404	0
miR-331	GO:0000279_M_phase	176	27	5.55882	-12.761	0
miR-331	GO:0007067_mitosis	146	23	5.7083	-11.1489	0
miR-331	GO:0000087_M_phase_of_mitotic_cell_cycle	148	23	5.63116	-11.0223	0
miR-331	GO:0006974_response_to_DNA_damage_stimulus	227	28	4.46955	-10.837	0
miR-331	GO:0051301_cell_division	163	23	5.11296	-10.1376	0
miR-331	GO:0009719_response_to_endogenous_stimulus	243	28	4.17526	-10.1207	0
miR-331	GO:0006281_DNA_repair	192	24	4.52941	-9.44139	0
miR-331	GO:0006261_DNA-dependent_DNA_replication	73	15	7.44561	-9.07671	0
miR-331	GO:0000074_regulation_of_progression_through_cell_cycle	361	32	3.21199	-8.56326	0
miR-331	GO:0051726_regulation_of_cell_cycle	365	32	3.17679	-8.4439	0
miR-331	GO:0007059_chromosome_segregation	40	11	9.96471	-8.21699	0
miR-331	GO:0000075_cell_cycle_checkpoint	41	11	9.72166	-8.09179	0
miR-331	GO:0006270_DNA_replication_initiation	24	8	12.0784	-6.8357	0
miR-331	GO:0000070_mitotic_sister_chromatid_segregation	17	7	14.9204	-6.77517	0
miR-331	GO:0000819_sister_chromatid_segregation	18	7	14.0915	-6.57149	0
miR-331	GO:0006139_nucleobase__nucleoside__nucleotide_and_nucleic_acid_metabolic_process	2129	91	1.54881	-6.33506	0
miR-331	GO:0007088_regulation_of_mitosis	44	9	7.41176	-5.62758	0
miR-331	GO:0007093_mitotic_checkpoint	17	6	12.7889	-5.40698	0.000417
miR-331	GO:0007051_spindle_organization_and_biogenesis	18	6	12.0784	-5.24091	0.0008
miR-331	GO:0000226_microtubule_cytoskeleton_organization_and_biogenesis	51	9	6.39446	-5.06745	0.000769
miR-331	GO:0007017_microtubule-based_process	114	13	4.13209	-4.87268	0.000741
miR-331	GO:0051276_chromosome_organization_and_biogenesis	248	20	2.9222	-4.84614	0.000714
miR-331	GO:0006950_response_to_stress	521	31	2.15604	-4.49777	0.001034
miR-331	GO:0030261_chromosome_condensation	15	5	12.0784	-4.43902	0.001
miR-331	GO:0043283_biopolymer_metabolic_process	2835	105	1.34205	-4.34734	0.000968
miR-331	GO:0048015_phosphoinositide-mediated_signaling	37	7	6.85533	-4.25482	0.000938
miR-331	GO:0006996_organelle_organization_and_biogenesis	674	36	1.93542	-4.163	0.000909
miR-331	GO:0007001_chromosome_organization_and_biogenesis_(sensu_Eukaryota)	238	18	2.74048	-4.0413	0.000882
miR-331	GO:0051329_interphase_of_mitotic_cell_cycle	57	8	5.08566	-3.82298	0.003143
miR-331	GO:0007076_mitotic_chromosome_condensation	11	4	13.1765	-3.79793	0.003333
miR-331	GO:0051325_interphase	58	8	4.99797	-3.76875	0.003514
miR-331	GO:0007126_meiosis	33	6	6.58824	-3.61512	0.005128
miR-331	GO:0051327_M_phase_of_meiotic_cell_cycle	33	6	6.58824	-3.61512	0.005128
miR-331	GO:0051321_meiotic_cell_cycle	34	6	6.39446	-3.54076	0.00575
miR-331	GO:0006310_DNA_recombination	65	8	4.45973	-3.41978	0.007317
miR-331	GO:0007010_cytoskeleton_organization_and_biogenesis	267	18	2.44283	-3.41594	0.007381

## Sheet: negatively correlated pathways
miRNAs	GO CATEGORY	TOTAL GENES	UNDEREXPRESSED GENES	ENRICHMENT	LOG10(p)	FALSE DISCOVERY RATE
miR-213	GO:0006044_N-acetylglucosamine_metabolic_process	16	4	21.443	-4.55273	0.009
miR-213	GO:0006041_glucosamine_metabolic_process	17	4	20.1817	-4.44007	0.006
miR-213	GO:0006040_amino_sugar_metabolic_process	19	4	18.0573	-4.23597	0.007
all miRNAs	GO:0006260_DNA_replication	142	47	2.66678	-10.1708	0
all miRNAs	GO:0000278_mitotic_cell_cycle	201	57	2.28484	-9.21812	0
all miRNAs	GO:0022403_cell_cycle_phase	214	58	2.18369	-8.54753	0
all miRNAs	GO:0006259_DNA_metabolic_process	489	105	1.73005	-8.46989	0
all miRNAs	GO:0007049_cell_cycle	574	116	1.62826	-7.71091	0
all miRNAs	GO:0022402_cell_cycle_process	489	99	1.63119	-6.64987	0
all miRNAs	GO:0006974_response_to_DNA_damage_stimulus	227	55	1.95216	-6.33887	0
all miRNAs	GO:0006281_DNA_repair	192	48	2.01427	-6.02054	0
all miRNAs	GO:0009719_response_to_endogenous_stimulus	243	56	1.85677	-5.69612	0
all miRNAs	GO:0051325_interphase	58	21	2.91722	-5.57401	0
all miRNAs	GO:0000279_M_phase	176	44	2.01427	-5.56596	0
all miRNAs	GO:0000075_cell_cycle_checkpoint	41	17	3.34074	-5.55656	0
all miRNAs	GO:0051301_cell_division	163	41	2.02663	-5.29694	0
all miRNAs	GO:0051329_interphase_of_mitotic_cell_cycle	57	20	2.82704	-5.09614	0
all miRNAs	GO:0007059_chromosome_segregation	40	16	3.22283	-5.02131	0
all miRNAs	GO:0006261_DNA-dependent_DNA_replication	73	23	2.53853	-4.87317	0
all miRNAs	GO:0000087_M_phase_of_mitotic_cell_cycle	148	37	2.01427	-4.77271	0.000118
all miRNAs	GO:0007067_mitosis	146	36	1.98668	-4.51984	0.000611
all miRNAs	GO:0007088_regulation_of_mitosis	44	16	2.92984	-4.40946	0.001105
all miRNAs	GO:0000082_G1_S_transition_of_mitotic_cell_cycle	24	11	3.69283	-4.2658	0.001238
all miRNAs	GO:0006270_DNA_replication_initiation	24	11	3.69283	-4.2658	0.001238
all miRNAs	GO:0006310_DNA_recombination	65	19	2.35514	-3.64313	0.006864
miR-98	GO:0007049_cell_cycle	574	38	4.11546	-14.221	0
miR-98	GO:0000278_mitotic_cell_cycle	201	22	6.80414	-12.3032	0
miR-98	GO:0022403_cell_cycle_phase	214	22	6.39081	-11.7434	0
miR-98	GO:0006259_DNA_metabolic_process	489	32	4.06807	-11.6536	0
miR-98	GO:0022402_cell_cycle_process	489	32	4.06807	-11.6536	0
miR-98	GO:0007067_mitosis	146	18	7.6642	-10.96	0
miR-98	GO:0000087_M_phase_of_mitotic_cell_cycle	148	18	7.56062	-10.8583	0
miR-98	GO:0000279_M_phase	176	19	6.71101	-10.5235	0
miR-98	GO:0006260_DNA_replication	142	17	7.44231	-10.155	0
miR-98	GO:0007059_chromosome_segregation	40	10	15.5413	-9.36363	0
miR-98	GO:0051301_cell_division	163	17	6.48348	-9.19842	0
miR-98	GO:0006139_nucleobase__nucleoside__nucleotide_and_nucleic_acid_metabolic_process	2129	63	1.83955	-8.04374	0
miR-98	GO:0007088_regulation_of_mitosis	44	9	12.7156	-7.63983	0
miR-98	GO:0051726_regulation_of_cell_cycle	365	22	3.74694	-7.2757	0
miR-98	GO:0043283_biopolymer_metabolic_process	2835	73	1.60072	-7.07711	0
miR-98	GO:0000070_mitotic_sister_chromatid_segregation	17	6	21.9406	-6.7912	0
miR-98	GO:0000074_regulation_of_progression_through_cell_cycle	361	21	3.61626	-6.68756	0
miR-98	GO:0000819_sister_chromatid_segregation	18	6	20.7217	-6.6208	0
miR-98	GO:0043170_macromolecule_metabolic_process	3667	82	1.39011	-5.42319	0.000263
miR-98	GO:0008283_cell_proliferation	369	19	3.20092	-5.27753	0.00025
miR-98	GO:0007051_spindle_organization_and_biogenesis	18	5	17.2681	-5.14724	0.000273
miR-98	GO:0051656_establishment_of_organelle_localization	18	5	17.2681	-5.14724	0.000273
miR-98	GO:0007017_microtubule-based_process	114	10	5.45308	-4.8897	0.000565
miR-98	GO:0006974_response_to_DNA_damage_stimulus	227	14	3.83397	-4.84635	0.000542
miR-98	GO:0051640_organelle_localization	21	5	14.8012	-4.7883	0.00052
miR-98	GO:0006261_DNA-dependent_DNA_replication	73	8	6.81262	-4.70874	0.000538
miR-98	GO:0009719_response_to_endogenous_stimulus	243	14	3.58153	-4.51336	0.000667
miR-98	GO:0051276_chromosome_organization_and_biogenesis	248	14	3.50932	-4.41522	0.000714
miR-98	GO:0045840_positive_regulation_of_mitosis	5	3	37.2991	-4.40275	0.000742
miR-98	GO:0050000_chromosome_localization	5	3	37.2991	-4.40275	0.000742
miR-98	GO:0051303_establishment_of_chromosome_localization	5	3	37.2991	-4.40275	0.000742
miR-98	GO:0009987_cellular_process	5915	107	1.12454	-4.32308	0.000906
miR-98	GO:0006281_DNA_repair	192	12	3.88532	-4.27026	0.000909
miR-98	GO:0044238_primary_metabolic_process	4171	86	1.28175	-4.13092	0.001088
miR-98	GO:0030261_chromosome_condensation	15	4	16.5774	-4.12234	0.001371
miR-98	GO:0007093_mitotic_checkpoint	17	4	14.6271	-3.89169	0.002083
miR-98	GO:0000226_microtubule_cytoskeleton_organization_and_biogenesis	51	6	7.31355	-3.82125	0.002243
miR-98	GO:0050794_regulation_of_cellular_process	2205	54	1.52241	-3.81589	0.002237
miR-98	GO:0000910_cytokinesis	18	4	13.8145	-3.78794	0.002282
miR-98	GO:0007001_chromosome_organization_and_biogenesis_(sensu_Eukaryota)	238	12	3.13438	-3.38928	0.004675
miR-98	GO:0007052_mitotic_spindle_organization_and_biogenesis	10	3	18.6495	-3.34913	0.005463
miR-98	GO:0000075_cell_cycle_checkpoint	41	5	7.58111	-3.33328	0.005571
miR-98	GO:0006270_DNA_replication_initiation	24	4	10.3609	-3.27959	0.005791
miR-98	GO:0007076_mitotic_chromosome_condensation	11	3	16.9541	-3.21593	0.006244
miR-98	GO:0045787_positive_regulation_of_progression_through_cell_cycle	11	3	16.9541	-3.21593	0.006244
miR-98	GO:0050789_regulation_of_biological_process	2333	54	1.43888	-3.12624	0.007087
miR-98	GO:0044237_cellular_metabolic_process	4173	83	1.23645	-3.07394	0.008191
miR-98	GO:0006996_organelle_organization_and_biogenesis	674	22	2.02913	-3.04386	0.008354
miR-331	GO:0006260_DNA_replication	142	34	11.5887	-27.0359	0
miR-331	GO:0007049_cell_cycle	574	58	4.89059	-26.0973	0
miR-331	GO:0006259_DNA_metabolic_process	489	54	5.34478	-25.9614	0
miR-331	GO:0022402_cell_cycle_process	489	49	4.8499	-21.3651	0
miR-331	GO:0022403_cell_cycle_phase	214	31	7.01121	-17.6938	0
miR-331	GO:0000278_mitotic_cell_cycle	201	30	7.22388	-17.4846	0
miR-331	GO:0000279_M_phase	176	27	7.425	-16.0174	0
miR-331	GO:0006974_response_to_DNA_damage_stimulus	227	28	5.97004	-14.0925	0
miR-331	GO:0007067_mitosis	146	23	7.62466	-13.8933	0
miR-331	GO:0000087_M_phase_of_mitotic_cell_cycle	148	23	7.52162	-13.7608	0
miR-331	GO:0009719_response_to_endogenous_stimulus	243	28	5.57695	-13.3277	0
miR-331	GO:0051301_cell_division	163	23	6.82945	-12.8314	0
miR-331	GO:0006281_DNA_repair	192	24	6.05	-12.1971	0
miR-331	GO:0000074_regulation_of_progression_through_cell_cycle	361	32	4.29031	-12.0317	0
miR-331	GO:0051726_regulation_of_cell_cycle	365	32	4.24329	-11.9	0
miR-331	GO:0006261_DNA-dependent_DNA_replication	73	15	9.9452	-10.8822	0
miR-331	GO:0006139_nucleobase__nucleoside__nucleotide_and_nucleic_acid_metabolic_process	2129	81	1.84143	-10.2036	0
miR-331	GO:0007059_chromosome_segregation	40	11	13.31	-9.56299	0
miR-331	GO:0000075_cell_cycle_checkpoint	41	11	12.9854	-9.43499	0
miR-331	GO:0006270_DNA_replication_initiation	24	8	16.1333	-7.82029	0
miR-331	GO:0000070_mitotic_sister_chromatid_segregation	17	7	19.9294	-7.64514	0
miR-331	GO:0000819_sister_chromatid_segregation	18	7	18.8222	-7.43878	0
miR-331	GO:0043283_biopolymer_metabolic_process	2835	90	1.53651	-7.2719	0
miR-331	GO:0006950_response_to_stress	521	30	2.78695	-6.75991	0
miR-331	GO:0007088_regulation_of_mitosis	44	9	9.9	-6.69163	0
miR-331	GO:0007017_microtubule-based_process	114	13	5.5193	-6.28378	0
miR-331	GO:0007093_mitotic_checkpoint	17	6	17.0824	-6.14433	0
miR-331	GO:0000226_microtubule_cytoskeleton_organization_and_biogenesis	51	9	8.54118	-6.11235	0
miR-331	GO:0007051_spindle_organization_and_biogenesis	18	6	16.1333	-5.97565	0
miR-331	GO:0051276_chromosome_organization_and_biogenesis	248	18	3.5129	-5.53383	0
miR-331	GO:0043170_macromolecule_metabolic_process	3667	102	1.34628	-5.48096	0
miR-331	GO:0006996_organelle_organization_and_biogenesis	674	32	2.29792	-5.32896	0
miR-331	GO:0009987_cellular_process	5915	137	1.12101	-5.12064	0
miR-331	GO:0030261_chromosome_condensation	15	5	16.1333	-5.05003	0.000294
miR-331	GO:0044238_primary_metabolic_process	4171	110	1.27643	-4.97361	0.000286
miR-331	GO:0051329_interphase_of_mitotic_cell_cycle	57	8	6.79298	-4.71856	0.000278
miR-331	GO:0051325_interphase	58	8	6.67586	-4.66166	0.00027
miR-331	GO:0044237_cellular_metabolic_process	4173	109	1.26422	-4.59546	0.000263
miR-331	GO:0007001_chromosome_organization_and_biogenesis_(sensu_Eukaryota)	238	16	3.25378	-4.54769	0.000256
miR-331	GO:0007126_meiosis	33	6	8.8	-4.3109	0.000244
miR-331	GO:0051327_M_phase_of_meiotic_cell_cycle	33	6	8.8	-4.3109	0.000244
miR-331	GO:0006310_DNA_recombination	65	8	5.95692	-4.29403	0.000238
miR-331	GO:0007076_mitotic_chromosome_condensation	11	4	17.6	-4.28841	0.000233
miR-331	GO:0051321_meiotic_cell_cycle	34	6	8.54118	-4.23396	0.000227
miR-331	GO:0048015_phosphoinositide-mediated_signaling	37	6	7.84865	-4.0184	0.000222
miR-331	GO:0007010_cytoskeleton_organization_and_biogenesis	267	16	2.90037	-3.94641	0.000435
miR-331	GO:0008152_metabolic_process	4509	112	1.20222	-3.55103	0.000851
miR-331	GO:0000910_cytokinesis	18	4	10.7556	-3.37016	0.0012
miR-331	GO:0031570_DNA_integrity_checkpoint	18	4	10.7556	-3.37016	0.0012
miR-331	GO:0051656_establishment_of_organelle_localization	18	4	10.7556	-3.37016	0.0012
miR-331	GO:0000079_regulation_of_cyclin-dependent_protein_kinase_activity	34	5	7.11765	-3.2204	0.001961
miR-331	GO:0051052_regulation_of_DNA_metabolic_process	35	5	6.91429	-3.16065	0.002692
miR-331	GO:0051640_organelle_localization	21	4	9.21905	-3.09973	0.003585
miR-331	GO:0006268_DNA_unwinding_during_replication	10	3	14.52	-3.03087	0.004386
miR-331	GO:0007052_mitotic_spindle_organization_and_biogenesis	10	3	14.52	-3.03087	0.004386
miR-331	GO:0032392_DNA_geometric_change	10	3	14.52	-3.03087	0.004386
miR-331	GO:0032508_DNA_duplex_unwinding	10	3	14.52	-3.03087	0.004386
miR-331	GO:0006284_base-excision_repair	22	4	8.8	-3.01954	0.004655

## Sheet: positively correlated pathways
miRNAs	GO CATEGORY	TOTAL GENES	OVEREXPRESSED GENES	ENRICHMENT	LOG10(p)	FALSE DISCOVERY RATE
miR-33b	GO:0000279_M_phase	176	12	8.03543	-7.66519	0
miR-33b	GO:0007049_cell_cycle	574	20	4.10637	-7.54078	0
miR-33b	GO:0007067_mitosis	146	11	8.87933	-7.49937	0
miR-33b	GO:0000087_M_phase_of_mitotic_cell_cycle	148	11	8.75934	-7.43779	0
miR-33b	GO:0051301_cell_division	163	11	7.95327	-7.00412	0
miR-33b	GO:0022403_cell_cycle_phase	214	12	6.60858	-6.72466	0
miR-33b	GO:0000278_mitotic_cell_cycle	201	11	6.44966	-6.08351	0
miR-33b	GO:0005524_ATP_binding	803	21	3.08208	-5.80663	0
miR-33b	GO:0007088_regulation_of_mitosis	44	6	16.0709	-5.78679	0
miR-33b	GO:0022402_cell_cycle_process	489	16	3.85613	-5.65625	0
miR-33b	GO:0030554_adenyl_nucleotide_binding	855	21	2.89463	-5.36611	9.1e-05
miR-33b	GO:0004674_protein_serine_threonine_kinase_activity	268	10	4.3975	-4.11065	0.00575
miR-33b	GO:0000166_nucleotide_binding	1216	23	2.22913	-4.00869	0.006231
miR-33b	GO:0017076_purine_nucleotide_binding	1054	21	2.34811	-3.97547	0.006071
miR-33b	GO:0044427_chromosomal_part	176	8	5.35695	-3.95506	0.0062
miR-33b	GO:0005634_nucleus	2606	37	1.67328	-3.82544	0.007875
miR-33b	GO:0006260_DNA_replication	142	7	5.80965	-3.73055	0.008647
miR-33b	GO:0000074_regulation_of_progression_through_cell_cycle	361	11	3.59109	-3.69473	0.008889
miR-33b	GO:0051726_regulation_of_cell_cycle	365	11	3.55173	-3.65297	0.008737
miR-181c	GO:0016020_membrane	2494	90	1.53829	-6.05586	0.001
miR-181c	GO:0030054_cell_junction	54	9	7.10461	-5.42036	0.0025
miR-181c	GO:0005886_plasma_membrane	759	38	2.13419	-5.33664	0.001667
miR-181c	GO:0007154_cell_communication	1553	62	1.70181	-5.25554	0.00125
miR-181c	GO:0044459_plasma_membrane_part	596	31	2.21721	-4.71326	0.0038
miR-363	GO:0007154_cell_communication	1553	87	1.52448	-5.11609	0.003
miR-222	GO:0007154_cell_communication	1553	53	1.95973	-7.06991	0
miR-222	GO:0007165_signal_transduction	1430	50	2.00782	-6.92406	0
miR-222	GO:0007166_cell_surface_receptor_linked_signal_transduction	469	24	2.93853	-5.90576	0.000333
miR-222	GO:0002376_immune_system_process	401	21	3.00723	-5.34845	0.0005
miR-222	GO:0006955_immune_response	307	16	2.99277	-4.1281	0.0058
all miRNAs	GO:0007154_cell_communication	1553	273	1.31039	-7.24696	0
all miRNAs	GO:0002376_immune_system_process	401	89	1.65446	-6.33542	0
all miRNAs	GO:0006955_immune_response	307	71	1.72397	-5.82719	0
all miRNAs	GO:0007165_signal_transduction	1430	246	1.28236	-5.6236	0
all miRNAs	GO:0051301_cell_division	163	44	2.01222	-5.6138	0
all miRNAs	GO:0032501_multicellular_organismal_process	1143	198	1.2913	-4.66926	0.001167
All miRs without miRs-331,-33b,-98	GO:0007154_cell_communication	1553	251	1.35707	-8.1643	0
All miRs without miRs-331,-33b,-98	GO:0007165_signal_transduction	1430	229	1.34462	-6.97868	0
All miRs without miRs-331,-33b,-98	GO:0002376_immune_system_process	401	81	1.69606	-6.2004	0
All miRs without miRs-331,-33b,-98	GO:0032501_multicellular_organismal_process	1143	182	1.33698	-5.26981	0.0005
All miRs without miRs-331,-33b,-98	GO:0006955_immune_response	307	63	1.72307	-5.15548	0.0004
All miRs without miRs-331,-33b,-98	GO:0051301_cell_division	163	38	1.95747	-4.5594	0.002333
All miRs without miRs-331,-33b,-98	GO:0051239_regulation_of_multicellular_organismal_process	100	26	2.1831	-4.12276	0.008143
